# Supplementary material for: Relative Burden of Large CNVs on a Range of Neurodevelopmental Phenotypes
Source: PubMed Central journal article supplement (PMC3213131; doi:10.1371/journal.pgen.1002334), 2011-11-10

**Figure S3. Diagnostic yield of different microarray reports from literature.**  
 Data is shown for sample sizes >50. Data obtained from Table 2 of Miller et al., AJHG.

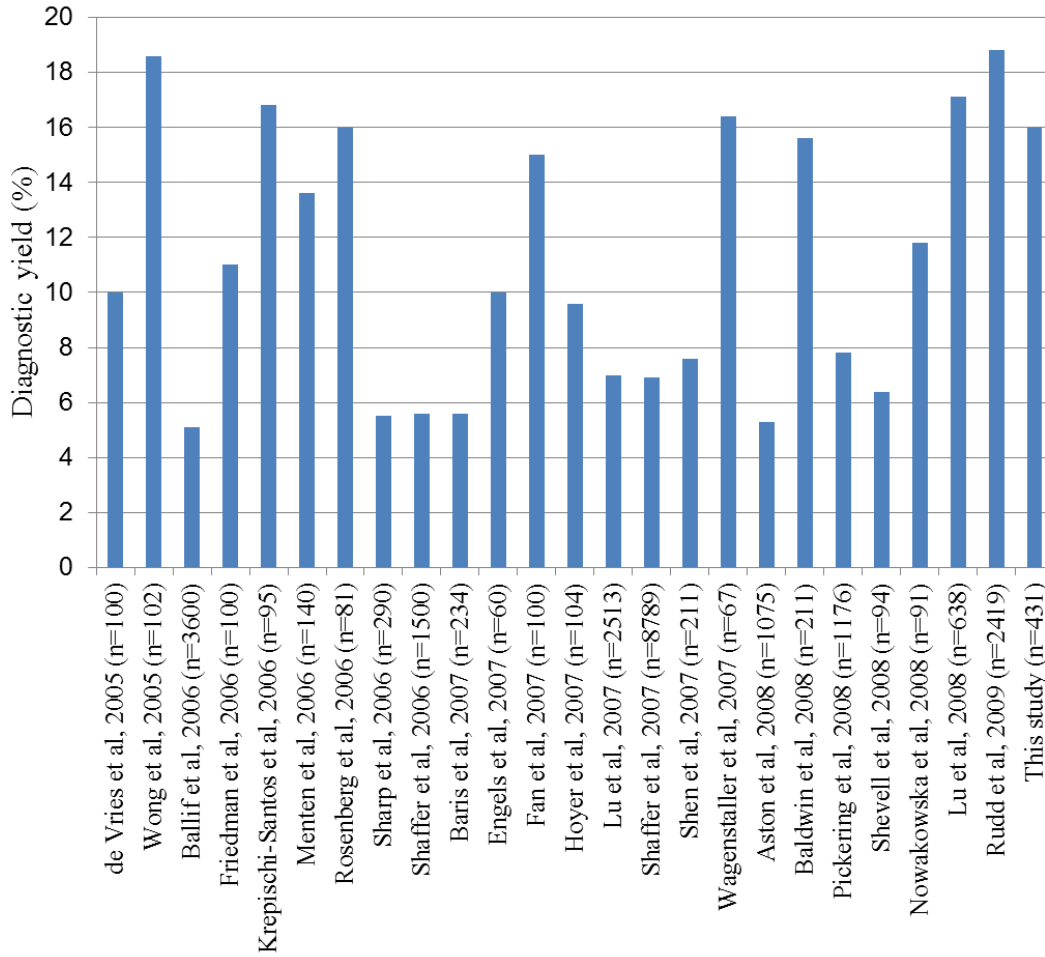

Supplement: pgen.1002334.s007.pdf [file pgen.1002334.s007.pdf]
