# Supplementary material for: Relative Burden of Large CNVs on a Range of Neurodevelopmental Phenotypes
Source: PubMed Central journal article supplement (PMC3213131; doi:10.1371/journal.pgen.1002334), 2011-11-10
Supplement: pgen.1002334.s008.pdf [file pgen.1002334.s008.pdf]

**Table S1. Chromosomal regions and probes targeted in the hotspot chip.**

| Chr   | Start     | End       | Size       | Number of probes | Probe spacing | Comments             |
|-------|-----------|-----------|------------|------------------|---------------|----------------------|
| chr1  | 39747785  | 40014937  | 267,152    | 101              | 2650          | 1q34.2               |
| chr1  | 47159990  | 47395404  | 235,414    | 89               | 2650          | 1p33                 |
| chr1  | 108580322 | 108727851 | 147,529    | 56               | 2650          | 1p13.3               |
| chr1  | 143500000 | 144800000 | 1,300,000  | 491              | 2650          | 1q21.1*              |
| chr1  | 144900000 | 146437500 | 1,537,500  | 580              | 2650          | 1q21.1*              |
| chr1  | 246650862 | 246900804 | 249,942    | 94               | 2650          | 1q44                 |
| chr2  | 86978679  | 89300000  | 2,321,321  | 876              | 2650          | 2p11.2               |
| chr2  | 94700000  | 97580877  | 2,880,877  | 1087             | 2650          | 2q11.1q11.2          |
| chr2  | 100063483 | 112904765 | 12,841,282 | 1000             | 12841         | 2q11.2q13            |
| chr2  | 109800000 | 110900000 | 1,100,000  | 415              | 2650          | 2q11.2q13            |
| chr2  | 130535282 | 131800847 | 1,265,565  | 478              | 2650          | 2q21.3               |
| chr2  | 232901972 | 233023193 | 121,221    | 46               | 2650          | 2q37.1*              |
| chr3  | 10065027  | 11908728  | 1,843,701  | 696              | 2650          | 3p25.3               |
| chr3  | 125158409 | 131242152 | 6,083,743  | 1000             | 6084          | 3q21.1q21.3          |
| chr3  | 196864663 | 198868245 | 2,003,582  | 756              | 2650          | 3q29*                |
| chr4  | 3963456   | 9357304   | 5,393,848  | 1000             | 5394          | 4p16.2p16.1*         |
| chr4  | 69713236  | 69923750  | 210,514    | 79               | 2650          | 4q13.2               |
| chr4  | 70056451  | 70332530  | 276,079    | 104              | 2650          | 4q13.2               |
| chr4  | 75501328  | 75712285  | 210,957    | 80               | 2650          | 4q13.3               |
| chr4  | 119740794 | 120580940 | 840,146    | 317              | 2650          | 4q26                 |
| chr5  | 288806    | 1647139   | 1,358,333  | 513              | 2650          | 5p15.33              |
| chr5  | 21540354  | 29492181  | 7,951,827  | 1000             | 7952          | 5p14.3p14.1          |
| chr5  | 68886201  | 70696072  | 1,809,871  | 683              | 2650          | 5q13.2               |
| chr5  | 98754229  | 99738292  | 984,063    | 371              | 2650          | 5q21.1               |
| chr5  | 175417851 | 177414855 | 1,997,004  | 754              | 2650          | 5q35.2q35.3 (Sotos)* |
| chr6  | 167499260 | 167726129 | 226,869    | 86               | 2650          | 6q27                 |
| chr7  | 29659104  | 35197599  | 5,538,495  | 1000             | 5538          | 7p15.1p14.3          |
| chr7  | 35951456  | 45755807  | 9,804,351  | 1000             | 9804          | 7p14.2p13            |
| chr7  | 45798959  | 56428389  | 10,629,430 | 1000             | 10629         | 7p13p11.2            |
| chr7  | 64160709  | 64898405  | 737,696    | 278              | 2650          | 7q11.21              |
| chr7  | 66122765  | 71909367  | 5,786,602  | 1000             | 5787          | 7q11.22              |
| chr7  | 72004121  | 76529725  | 4,525,604  | 1000             | 4526          | 7q11.23 (Williams)*  |
| chr7  | 149217715 | 153493015 | 4,275,300  | 1000             | 4275          | 7q36.1q36.2          |
| chr8  | 2167584   | 2331389   | 163,805    | 62               | 2650          | 8p23.3p23.2          |
| chr8  | 6933974   | 12586975  | 5,653,001  | 1000             | 5653          | 8p23.1*              |
| chr8  | 145259368 | 145429821 | 170,453    | 64               | 2650          | 8q24.3*              |
| chr9  | 33372122  | 47107499  | 13,735,377 | 1000             | 13735         | 9p13.3p13.2          |
| chr9  | 66194476  | 70221504  | 4,027,028  | 1000             | 4027          | 9q12q13              |
| chr9  | 85632604  | 87600000  | 1,967,396  | 742              | 2650          | 9q21.32q21.33        |
| chr9  | 89717505  | 89944931  | 227,426    | 86               | 2650          | 9q22.1               |
| chr9  | 96108889  | 98751432  | 2,642,543  | 997              | 2650          | 9q22.32              |
| chr10 | 27600000  | 28308559  | 708,559    | 267              | 2650          | 10p12.1              |
| chr10 | 45491749  | 51585709  | 6,093,960  | 1000             | 6094          | 10q11.22             |
| chr10 | 81129803  | 89119394  | 7,989,591  | 1000             | 7990          | 10q23.1*             |
| chr11 | 48578987  | 51500000  | 2,921,013  | 1000             | 2921          | 11p11.2              |
| chr11 | 54440000  | 55418071  | 978,071    | 369              | 2650          | 11q11                |
| chr11 | 67312280  | 71193473  | 3,881,193  | 1000             | 3881          | 11q13.2q13.4         |

|       |           |           |           |      |      |                          |
|-------|-----------|-----------|-----------|------|------|--------------------------|
| chr12 | 9327470   | 9492133   | 164,663   | 62   | 2650 | 12p13.31                 |
| chr12 | 34012279  | 37041888  | 3,029,609 | 1000 | 3030 | 12p11.1q12               |
| chr13 | 18878590  | 24453912  | 5,575,322 | 1000 | 5575 | 13q12.11q12.12           |
| chr15 | 19600000  | 20900000  | 1,300,000 | 491  | 2650 | 15q11.2 (BP1-BP2)*       |
| chr15 | 20900000  | 26700000  | 5,800,000 | 1000 | 5800 | 15q11.2q13.1 (BP2-BP3)*  |
| chr15 | 26700000  | 30687000  | 3,987,000 | 1000 | 3987 | 15q13.1q13.3 (BP3-BP5)*  |
| chr15 | 70698860  | 73384192  | 2,685,332 | 1000 | 2685 | 15q24.1q24.2*            |
| chr15 | 73760175  | 75985592  | 2,225,417 | 840  | 2650 | 15q24.2q24.3*            |
| chr15 | 80416103  | 83597521  | 3,181,418 | 1000 | 3181 | 15q25.2*                 |
| chr16 | 11926087  | 21500000  | 9,573,913 | 1000 | 9574 | 16p13.11p13.3*           |
| chr16 | 21500000  | 28800000  | 7,300,000 | 1000 | 7300 | 16p12.1p11.2*            |
| chr16 | 28800000  | 30254369  | 1,454,369 | 549  | 2650 | 16p11.2*                 |
| chr16 | 31868654  | 33678258  | 1,809,604 | 683  | 2650 | 16p11.2                  |
| chr16 | 68534999  | 73147662  | 4,612,663 | 1000 | 4613 | 16q22.1q22.3             |
| chr17 | 2900904   | 3103469   | 202,565   | 76   | 2650 | 17p13.3 (Miller-Dieker)* |
| chr17 | 14014753  | 15750000  | 1,735,247 | 655  | 2650 | 17p12 (CMT1A/HNPP)*      |
| chr17 | 15750000  | 18500000  | 2,750,000 | 1000 | 2750 | 17p11.2p12 (SMS)*        |
| chr17 | 18500000  | 20750885  | 2,250,885 | 849  | 2650 | 17p11.2                  |
| chr17 | 21390699  | 21863694  | 472,995   | 178  | 2650 | GAP                      |
| chr17 | 31430104  | 33585562  | 2,155,458 | 813  | 2650 | 17q12 (RCAD)*            |
| chr17 | 33604213  | 43026435  | 9,422,222 | 1000 | 9422 | 17q21*                   |
| chr17 | 55005023  | 57730605  | 2,725,582 | 1000 | 2726 | 17q23.1q23.2             |
| chr18 | 10594201  | 12221380  | 1,627,179 | 614  | 2650 | 18p11.2p11.21            |
| chr19 | 22351817  | 22654242  | 302,425   | 114  | 2650 | 19p12                    |
| chr19 | 41455484  | 42488459  | 1,032,975 | 390  | 2650 | 19q13.12                 |
| chr19 | 53098555  | 55333144  | 2,234,589 | 843  | 2650 | 19q13.32q13.33           |
| chr20 | 45887205  | 46571012  | 683,807   | 258  | 2650 | 20p13                    |
| chr22 | 15385667  | 23387607  | 8,001,940 | 1000 | 8002 | 22q11.2q11.23*           |
| chr22 | 45200000  | 49500000  | 4,300,000 | 1000 | 4300 | 22q13*                   |
| chrX  | 36896326  | 37339751  | 443,425   | 167  | 2650 | Xp12.1                   |
| chrX  | 48035332  | 52772103  | 4,736,771 | 1000 | 4737 | Xp11.23p11.22            |
| chrX  | 57617021  | 57972819  | 355,798   | 134  | 2650 | Xp11.1                   |
| chrX  | 148421847 | 148866679 | 444,832   | 168  | 2650 | Xq28                     |
| chrX  | 152024335 | 152216219 | 191,884   | 72   | 2650 | Xq28                     |
| chrX  | 154219195 | 154387405 | 168,210   | 63   | 2650 | Xq28                     |
| chrY  | 6167831   | 10362225  | 4,194,394 | 1000 | 4194 | Yp11.2                   |
| chrY  | 22077505  | 23217056  | 1,139,551 | 430  | 2650 | Yq11.23                  |
| chrY  | 23566258  | 26800000  | 3,233,742 | 1000 | 3234 | Yq11.23q11.2             |

\*Regions associated with known genomic disorders.
