# Supplementary material for: Relative Burden of Large CNVs on a Range of Neurodevelopmental Phenotypes
Source: PubMed Central journal article supplement (PMC3213131; doi:10.1371/journal.pgen.1002334), 2011-11-10
Supplement: pgen.1002334.s009.pdf [file pgen.1002334.s009.pdf]

**Table S2. Confirmation of CNVs arrays using custom high density arrays.**

| Hotspot v1 calls |           |           |        |          | Validation using Agilent high density array |           |           |        |          |        |             |
|------------------|-----------|-----------|--------|----------|---------------------------------------------|-----------|-----------|--------|----------|--------|-------------|
| chrA             | startA    | endA      | idA    | size     | chrB                                        | startB    | endB      | idB    | size     | SD (%) | Comments    |
| chr1             | 76466419  | 77200494  | T03399 | 734075   | chr1                                        | 76471119  | 77195570  | T03399 | 724451   | 0      | non-hotspot |
| chr1             | 147781430 | 147965026 | T02597 | 183596   | chr1                                        | 147781430 | 147965026 | T02597 | 183596   | 100    | hotspot     |
| chr1             | 246776970 | 246861620 | T01613 | 84650    | chr1                                        | 246776969 | 246877223 | T01613 | 100254   | 49     | hotspot     |
| chr1             | 246776970 | 246861620 | T03401 | 84650    | chr1                                        | 246776969 | 246973708 | T03401 | 196739   | 49     | hotspot     |
| chr1             | 246806247 | 246861620 | T02457 | 55373    | chr1                                        | 246806246 | 246948893 | T02457 | 142647   | 22     | hotspot     |
| chr10            | 46200173  | 46840225  | T03249 | 640052   | chr10                                       | 46372252  | 46558714  | T03249 | 186462   | 71     | hotspot     |
| chr10            | 46391938  | 46557601  | T02539 | 165663   | chr10                                       | 46382449  | 46557600  | T02539 | 175151   | 1      | hotspot     |
| chr10            | 46391938  | 46560520  | T02237 | 168582   | chr10                                       | 46263774  | 46587337  | T02237 | 323563   | 1      | hotspot     |
| chr10            | 46391938  | 46560520  | T02237 | 168582   | chr10                                       | 46391937  | 46560519  | T02237 | 168582   | 1      | hotspot     |
| chr10            | 47006156  | 47209096  | T01613 | 202940   | chr10                                       | 47007445  | 47030359  | T01613 | 22914    | 85     | hotspot     |
| chr10            | 47006156  | 47209096  | T03401 | 202940   | chr10                                       | 47007445  | 47207546  | T03401 | 200101   | 85     | hotspot     |
| chr10            | 47007446  | 47243285  | T01402 | 235839   | chr10                                       | 47220214  | 47220825  | T01402 | 611      | 87     | hotspot     |
| chr10            | 47007446  | 47243285  | T01402 | 235839   | chr10                                       | 47007445  | 47207546  | T01402 | 200101   | 87     | hotspot     |
| chr10            | 47058972  | 47173905  | T02511 | 114933   | chr10                                       | 47006155  | 47209095  | T02511 | 202940   | 74     | hotspot     |
| chr10            | 56612672  | 57015738  | T02560 | 403066   | chr10                                       | 56609630  | 57074555  | T02560 | 464925   | 0      | non-hotspot |
| chr10            | 128662416 | 129042087 | T01402 | 379671   | chr10                                       | 128656721 | 129054633 | T01402 | 397912   | 0      | non-hotspot |
| chr11            | 22232079  | 25091772  | T01613 | 2859693  | chr11                                       | 22250980  | 24986578  | T01613 | 2735598  | 0      | non-hotspot |
| chr11            | 55097313  | 55209463  | T02457 | 112150   | chr11                                       | 55110761  | 55209462  | T02457 | 98701    | 0      | hotspot     |
| chr11            | 55097313  | 55209463  | T03262 | 112150   | chr11                                       | 55123517  | 55209462  | T03262 | 85945    | 0      | hotspot     |
| chr11            | 55110762  | 55209463  | T02237 | 98701    | chr11                                       | 55110761  | 55209462  | T02237 | 98701    | 0      | hotspot     |
| chr11            | 55110762  | 55209463  | T02237 | 98701    | chr11                                       | 55123780  | 55209462  | T02237 | 85682    | 0      | hotspot     |
| chr11            | 55110762  | 55209463  | T03187 | 98701    | chr11                                       | 55110762  | 55209463  | T03187 | 98701    | 0      | hotspot     |
| chr11            | 55123518  | 55209463  | T01613 | 85945    | chr11                                       | 55123780  | 55209462  | T01613 | 85682    | 0      | hotspot     |
| chr11            | 55123518  | 55209463  | T02257 | 85945    | chr11                                       | 55123780  | 55209462  | T02257 | 85682    | 0      | hotspot     |
| chr11            | 55123518  | 55209463  | T03401 | 85945    | chr11                                       | 55123780  | 55209462  | T03401 | 85682    | 0      | hotspot     |
| chr11            | 55123518  | 55209463  | T03413 | 85945    | chr11                                       | 55123517  | 55209462  | T03413 | 85945    | 0      | hotspot     |
| chr11            | 55123518  | 55209463  | T03413 | 85945    | chr11                                       | 55123780  | 55216262  | T03413 | 92482    | 0      | hotspot     |
| chr11            | 55123518  | 55209463  | T03448 | 85945    | chr11                                       | 55123780  | 55209462  | T03448 | 85682    | 0      | hotspot     |
| chr11            | 55123518  | 55209463  | T072   | 85945    | chr11                                       | 55123780  | 55209462  | T072   | 85682    | 0      | hotspot     |
| chr11            | 55123518  | 55209463  | T02539 | 85945    | chr11                                       | 55123518  | 55209463  | T02539 | 85945    | 0      | hotspot     |
| chr11            | 55123518  | 55221807  | T02511 | 98289    | chr11                                       | 55110761  | 55209462  | T02511 | 98701    | 0      | hotspot     |
| chr11            | 84087102  | 84240239  | T03099 | 153137   | chr11                                       | 84090999  | 84247764  | T03099 | 156765   | 0      | non-hotspot |
| chr11            | 121813520 | 134447248 | T02597 | 12633728 | chr11                                       | 121809317 | 134424866 | T02597 | 12615549 | 2      | non-hotspot |
| chr13            | 48532965  | 48903297  | T02522 | 370332   | chr13                                       | 48532965  | 48903297  | T02522 | 370332   | 0      | non-hotspot |
| chr13            | 95576502  | 96051348  | T02175 | 474846   | chr13                                       | 95576501  | 96017618  | T02175 | 441117   | 0      | non-hotspot |
| chr13            | 112719313 | 113055112 | T02237 | 335799   | chr13                                       | 112766967 | 112767804 | T02237 | 837      | 0      | non-hotspot |
| chr15            | 18469959  | 19657464  | T02597 | 1187505  | chr15                                       | 18571399  | 18863527  | T02597 | 292128   | 94     | hotspot     |

|       |          |           |        |          |       |          |          |        |         |     |             |
|-------|----------|-----------|--------|----------|-------|----------|----------|--------|---------|-----|-------------|
| chr15 | 18469959 | 19657464  | T02597 | 1187505  | chr15 | 19080050 | 19465053 | T02597 | 385003  | 94  | hotspot     |
| chr15 | 18748445 | 19657464  | T03249 | 909019   | chr15 | 18748445 | 19657464 | T03249 | 909019  | 92  | hotspot     |
| chr15 | 19080051 | 19465054  | T02457 | 385003   | chr15 | 19080050 | 19465053 | T02457 | 385003  | 82  | hotspot     |
| chr15 | 19080051 | 19465054  | T02511 | 385003   | chr15 | 19080050 | 19465053 | T02511 | 385003  | 82  | hotspot     |
| chr15 | 19080051 | 19465054  | T02539 | 385003   | chr15 | 19107458 | 19465053 | T02539 | 357595  | 82  | hotspot     |
| chr15 | 19080051 | 19465054  | T03262 | 385003   | chr15 | 19080050 | 19465053 | T03262 | 385003  | 82  | hotspot     |
| chr15 | 19080051 | 19465054  | T03401 | 385003   | chr15 | 19107458 | 19465053 | T03401 | 357595  | 82  | hotspot     |
| chr15 | 19080051 | 19465054  | T03448 | 385003   | chr15 | 19107458 | 19465053 | T03448 | 357595  | 82  | hotspot     |
| chr15 | 19763549 | 20084406  | T02597 | 320857   | chr15 | 19774581 | 20080161 | T02597 | 305580  | 91  | hotspot     |
| chr15 | 19774582 | 19869177  | T02511 | 94595    | chr15 | 19774581 | 19835414 | T02511 | 60833   | 100 | hotspot     |
| chr15 | 19774582 | 19922897  | T02257 | 148315   | chr15 | 19792418 | 19916386 | T02257 | 123968  | 100 | hotspot     |
| chr15 | 19774582 | 20076090  | T01164 | 301508   | chr15 | 19774581 | 20076089 | T01164 | 301508  | 90  | hotspot     |
| chr15 | 19774582 | 20076090  | T01164 | 301508   | chr15 | 19792418 | 19997318 | T01164 | 204900  | 90  | hotspot     |
| chr15 | 19774582 | 20076090  | T01164 | 301508   | chr15 | 20055171 | 20082157 | T01164 | 26986   | 90  | hotspot     |
| chr15 | 19774582 | 20080162  | T02457 | 305580   | chr15 | 19774581 | 20080161 | T02457 | 305580  | 91  | hotspot     |
| chr15 | 19774582 | 20080162  | T02539 | 305580   | chr15 | 19792418 | 20082432 | T02539 | 290014  | 91  | hotspot     |
| chr15 | 19774582 | 20080162  | T03448 | 305580   | chr15 | 19792418 | 20073872 | T03448 | 281454  | 91  | hotspot     |
| chr15 | 19886399 | 20061404  | T02511 | 175005   | chr15 | 19926975 | 20061403 | T02511 | 134428  | 84  | hotspot     |
| chr15 | 19886399 | 20080162  | T03401 | 193763   | chr15 | 19792418 | 20070064 | T03401 | 277646  | 85  | hotspot     |
| chr15 | 19926976 | 19988453  | T02237 | 61477    | chr15 | 19792418 | 20094023 | T02237 | 301605  | 72  | hotspot     |
| chr15 | 19926976 | 19988453  | T02237 | 61477    | chr15 | 19884597 | 20076089 | T02237 | 191492  | 72  | hotspot     |
| chr15 | 26994610 | 30522495  | T01879 | 3527885  | chr15 | 26998905 | 27639098 | T01879 | 640193  | 33  | hotspot     |
| chr15 | 26994610 | 30522495  | T01879 | 3527885  | chr15 | 26996853 | 28152233 | T01879 | 1155380 | 33  | hotspot     |
| chr15 | 26994610 | 30522495  | T01879 | 3527885  | chr15 | 27942907 | 28031823 | T01879 | 88916   | 33  | hotspot     |
| chr15 | 26994610 | 30522495  | T01879 | 3527885  | chr15 | 27648502 | 27652671 | T01879 | 4169    | 33  | hotspot     |
| chr15 | 26994610 | 30522495  | T01879 | 3527885  | chr15 | 27668682 | 27890970 | T01879 | 222288  | 33  | hotspot     |
| chr15 | 26994610 | 30522495  | T01879 | 3527885  | chr15 | 28425524 | 28461374 | T01879 | 35850   | 33  | hotspot     |
| chr15 | 26994610 | 30522495  | T01879 | 3527885  | chr15 | 28064905 | 28295240 | T01879 | 230335  | 33  | hotspot     |
| chr15 | 26994610 | 30522495  | T01879 | 3527885  | chr15 | 28315441 | 28518068 | T01879 | 202627  | 33  | hotspot     |
| chr15 | 26994610 | 30522495  | T01879 | 3527885  | chr15 | 28703438 | 30225536 | T01879 | 1522098 | 33  | hotspot     |
| chr15 | 26994610 | 30522495  | T01879 | 3527885  | chr15 | 28754787 | 29287087 | T01879 | 532300  | 33  | hotspot     |
| chr15 | 26994610 | 30522495  | T01879 | 3527885  | chr15 | 29310191 | 29360403 | T01879 | 50212   | 33  | hotspot     |
| chr15 | 26994610 | 30522495  | T01879 | 3527885  | chr15 | 29380916 | 29485266 | T01879 | 104350  | 33  | hotspot     |
| chr15 | 26994610 | 30522495  | T01879 | 3527885  | chr15 | 29960686 | 30381701 | T01879 | 421015  | 33  | hotspot     |
| chr15 | 26994610 | 30522495  | T01879 | 3527885  | chr15 | 29510391 | 29523381 | T01879 | 12990   | 33  | hotspot     |
| chr15 | 26994610 | 30522495  | T01879 | 3527885  | chr15 | 29574652 | 29945959 | T01879 | 371307  | 33  | hotspot     |
| chr15 | 26994610 | 30522495  | T01879 | 3527885  | chr15 | 30348746 | 30390543 | T01879 | 41797   | 33  | hotspot     |
| chr15 | 26994610 | 30522495  | T01879 | 3527885  | chr15 | 30400384 | 30505772 | T01879 | 105388  | 33  | hotspot     |
| chr15 | 80767738 | 100147041 | T02522 | 19379303 | chr15 | 81029877 | 81039845 | T02522 | 9968    | 5   | non-hotspot |
| chr15 | 80767738 | 100147041 | T02522 | 19379303 | chr15 | 81011780 | 81019879 | T02522 | 8099    | 5   | non-hotspot |

|       |           |           |        |          |       |           |           |        |         |    |                    |
|-------|-----------|-----------|--------|----------|-------|-----------|-----------|--------|---------|----|--------------------|
| chr15 | 80767738  | 100147041 | T02522 | 19379303 | chr15 | 83444383  | 83450742  | T02522 | 6359    | 5  | non-hotspot        |
| chr15 | 80767738  | 100147041 | T02522 | 19379303 | chr15 | 81125842  | 81129261  | T02522 | 3419    | 5  | non-hotspot        |
| chr15 | 80767738  | 100147041 | T02522 | 19379303 | chr15 | 81472226  | 81474343  | T02522 | 2117    | 5  | non-hotspot        |
| chr15 | 80767738  | 100147041 | T02522 | 19379303 | chr15 | 81392480  | 81410164  | T02522 | 17684   | 5  | non-hotspot        |
| chr15 | 80767738  | 100147041 | T02522 | 19379303 | chr15 | 81416166  | 81420168  | T02522 | 4002    | 5  | non-hotspot        |
| chr15 | 80767738  | 100147041 | T02522 | 19379303 | chr15 | 82116141  | 82120064  | T02522 | 3923    | 5  | non-hotspot        |
| chr15 | 80767738  | 100147041 | T02522 | 19379303 | chr15 | 81575659  | 81578551  | T02522 | 2892    | 5  | non-hotspot        |
| chr15 | 80767738  | 100147041 | T02522 | 19379303 | chr15 | 81669530  | 81672359  | T02522 | 2829    | 5  | non-hotspot        |
| chr15 | 80767738  | 100147041 | T02522 | 19379303 | chr15 | 81990994  | 81994086  | T02522 | 3092    | 5  | non-hotspot        |
| chr15 | 80767738  | 100147041 | T02522 | 19379303 | chr15 | 82579682  | 82582077  | T02522 | 2395    | 5  | non-hotspot        |
| chr15 | 80767738  | 100147041 | T02522 | 19379303 | chr15 | 83013827  | 83018237  | T02522 | 4410    | 5  | non-hotspot        |
| chr15 | 80767738  | 100147041 | T02522 | 19379303 | chr15 | 83640941  | 83643184  | T02522 | 2243    | 5  | non-hotspot        |
| chr15 | 80767738  | 100147041 | T02522 | 19379303 | chr15 | 87107799  | 87145348  | T02522 | 37549   | 5  | non-hotspot        |
| chr15 | 80767738  | 100147041 | T02522 | 19379303 | chr15 | 86881518  | 86881875  | T02522 | 357     | 5  | non-hotspot        |
| chr16 | 14936606  | 16426815  | T03401 | 1490209  | chr16 | 14956439  | 15196795  | T03401 | 240356  | 45 | hotspot            |
| chr16 | 14936606  | 16426815  | T03401 | 1490209  | chr16 | 15213052  | 15224264  | T03401 | 11212   | 45 | hotspot            |
| chr16 | 14936606  | 16426815  | T03401 | 1490209  | chr16 | 15320723  | 16308653  | T03401 | 987930  | 45 | hotspot            |
| chr16 | 14936606  | 16426815  | T03401 | 1490209  | chr16 | 16368337  | 16432169  | T03401 | 63832   | 45 | hotspot            |
| chr16 | 14956201  | 15313894  | T03401 | 357693   | chr16 | 14956439  | 15196795  | T03401 | 240356  | 88 | hotspot            |
| chr16 | 14956201  | 15313894  | T03401 | 357693   | chr16 | 15213052  | 15224264  | T03401 | 11212   | 88 | hotspot            |
| chr16 | 15386338  | 16177142  | T03401 | 790804   | chr16 | 15320723  | 16308653  | T03401 | 987930  | 4  | hotspot            |
| chr16 | 22538122  | 22622184  | T01879 | 84062    | chr16 | 22465067  | 22618053  | T01879 | 152986  | 0  | hotspot            |
| chr16 | 22538122  | 22622184  | T01879 | 84062    | chr16 | 22538121  | 22611974  | T01879 | 73853   | 0  | hotspot            |
| chr16 | 29554938  | 30104150  | T02257 | 549212   | chr16 | 29559250  | 30107017  | T02257 | 547767  | 0  | hotspot            |
| chr16 | 29560614  | 29619541  | T02257 | 58927    | chr16 | 29559250  | 30107017  | T02257 | 547767  | 0  | hotspot            |
| chr16 | 29698146  | 30101408  | T02257 | 403262   | chr16 | 29559250  | 30107017  | T02257 | 547767  | 0  | hotspot            |
| chr17 | 34089604  | 34566438  | T072   | 476834   | chr17 | 34107261  | 34553178  | T072   | 445917  | 6  | hotspot            |
| chr17 | 34112649  | 34553179  | T072   | 440530   | chr17 | 34107261  | 34553178  | T072   | 445917  | 6  | hotspot            |
| chr17 | 41781685  | 42145162  | T01402 | 363477   | chr17 | 41781685  | 42145162  | T01402 | 363477  | 98 | hotspot            |
| chr18 | 50965716  | 52820402  | T01164 | 1854686  | chr18 | 50968251  | 51875891  | T01164 | 907640  | 0  | non-hotspot        |
| chr18 | 50965716  | 52820402  | T01164 | 1854686  | chr18 | 50965715  | 52991818  | T01164 | 2026103 | 0  | non-hotspot        |
| chr18 | 50965716  | 52820402  | T01164 | 1854686  | chr18 | 51876959  | 52835234  | T01164 | 958275  | 0  | non-hotspot        |
| chr19 | 60032498  | 61147051  | T03262 | 1114553  | chr19 | 60032497  | 61214380  | T03262 | 1181883 | 6  | non-hotspot        |
| chr2  | 89093011  | 89400666  | T02560 | 307655   | chr2  | 89093010  | 89405605  | T02560 | 312595  | 93 | hotspot            |
| chr2  | 89571966  | 89921719  | T02560 | 349753   | chr2  | 89571965  | 89900508  | T02560 | 328543  | 92 | hotspot            |
| chr2  | 188179827 | 188853079 | T02522 | 673252   | chr2  | 188179827 | 188853079 | T02522 | 673252  | 0  | non-hotspot        |
| chr2  | 242392773 | 242736154 | T01879 | 343381   | chr2  | 242499630 | 242704103 | T01879 | 204473  | 30 | hotspot-associated |
| chr2  | 242392773 | 242736154 | T01879 | 343381   | chr2  | 242526867 | 242736153 | T01879 | 209286  | 30 | hotspot-associated |
| chr22 | 17011430  | 17292686  | T02597 | 281256   | chr22 | 17011430  | 17292686  | T02597 | 281256  | 96 | hotspot            |
| chr22 | 18471415  | 18748557  | T01893 | 277142   | chr22 | 17274543  | 18748556  | T01893 | 1474013 | 48 | hotspot            |

|       |           |           |        |         |       |           |           |        |         |     |                    |
|-------|-----------|-----------|--------|---------|-------|-----------|-----------|--------|---------|-----|--------------------|
| chr22 | 19797358  | 20100802  | T03249 | 303444  | chr22 | 19838221  | 19943293  | T03249 | 105072  | 100 | hotspot-associated |
| chr3  | 50846910  | 58424157  | T03448 | 7577247 | chr3  | 50929636  | 51281103  | T03448 | 351467  | 0   | non-hotspot        |
| chr3  | 50846910  | 58424157  | T03448 | 7577247 | chr3  | 52546856  | 52782978  | T03448 | 236122  | 0   | non-hotspot        |
| chr3  | 50846910  | 58424157  | T03448 | 7577247 | chr3  | 52871729  | 53026639  | T03448 | 154910  | 0   | non-hotspot        |
| chr3  | 50846910  | 58424157  | T03448 | 7577247 | chr3  | 53297489  | 57397354  | T03448 | 4099865 | 0   | non-hotspot        |
| chr3  | 62489009  | 63295392  | T03445 | 806383  | chr3  | 62486882  | 63317886  | T03445 | 831004  | 0   | non-hotspot        |
| chr3  | 62489781  | 63320060  | T03445 | 832020  | chr3  | 62486882  | 63317886  | T03445 | 831004  | 1   | hotspot-associated |
| chr3  | 127000260 | 131353408 | T02237 | 4353148 | chr3  | 128948483 | 128994675 | T02237 | 46192   | 10  | hotspot-associated |
| chr3  | 127000260 | 131353408 | T02237 | 4353148 | chr3  | 130143643 | 130167164 | T02237 | 23521   | 10  | hotspot-associated |
| chr3  | 127000260 | 131353408 | T02237 | 4353148 | chr3  | 130697089 | 130705883 | T02237 | 8794    | 10  | hotspot-associated |
| chr3  | 127000260 | 131353408 | T02237 | 4353148 | chr3  | 131273933 | 131289308 | T02237 | 15375   | 10  | hotspot-associated |
| chr3  | 163645814 | 164487738 | T02539 | 841924  | chr3  | 163666597 | 163990861 | T02539 | 324264  | 0   | non-hotspot        |
| chr3  | 163645814 | 164487738 | T02539 | 841924  | chr3  | 164100819 | 164636767 | T02539 | 535948  | 0   | non-hotspot        |
| chr3  | 163645815 | 164649782 | T02539 | 1003967 | chr3  | 163666597 | 163990861 | T02539 | 324264  | 0   | non-hotspot        |
| chr3  | 163645815 | 164649782 | T02539 | 1003967 | chr3  | 164100819 | 164636767 | T02539 | 535948  | 0   | non-hotspot        |
| chr3  | 163679745 | 164557737 | T02457 | 877992  | chr3  | 163679744 | 164487737 | T02457 | 807993  | 0   | non-hotspot        |
| chr3  | 180461081 | 180763350 | T03401 | 302269  | chr3  | 180468733 | 180628891 | T03401 | 160158  | 2   | hotspot-associated |
| chr3  | 196881289 | 196950899 | T03401 | 69610   | chr3  | 196910403 | 196961676 | T03401 | 51273   | 45  | hotspot            |
| chr3  | 196906336 | 196958628 | T03445 | 52292   | chr3  | 196882266 | 197001549 | T03445 | 119283  | 13  | hotspot            |
| chr3  | 197188186 | 198861094 | T03249 | 1672908 | chr3  | 197231467 | 197352530 | T03249 | 121063  | 5   | hotspot-associated |
| chr3  | 197188186 | 198861094 | T03249 | 1672908 | chr3  | 197442329 | 197843020 | T03249 | 400691  | 5   | hotspot-associated |
| chr3  | 197188186 | 198861094 | T03249 | 1672908 | chr3  | 198246793 | 198534763 | T03249 | 287970  | 5   | hotspot-associated |
| chr3  | 197188186 | 198861094 | T03249 | 1672908 | chr3  | 197862429 | 197869846 | T03249 | 7417    | 5   | hotspot-associated |
| chr3  | 197188186 | 198861094 | T03249 | 1672908 | chr3  | 197877081 | 198111628 | T03249 | 234547  | 5   | hotspot-associated |
| chr3  | 197188186 | 198861094 | T03249 | 1672908 | chr3  | 198132998 | 198158201 | T03249 | 25203   | 5   | hotspot-associated |
| chr3  | 197188186 | 198861094 | T03249 | 1672908 | chr3  | 198167857 | 198177065 | T03249 | 9208    | 5   | hotspot-associated |
| chr3  | 197188186 | 198861094 | T03249 | 1672908 | chr3  | 198639865 | 198650589 | T03249 | 10724   | 5   | hotspot-associated |
| chr3  | 197188186 | 198861094 | T03249 | 1672908 | chr3  | 198690562 | 198694242 | T03249 | 3680    | 5   | hotspot-associated |
| chr3  | 197188186 | 198861094 | T03249 | 1672908 | chr3  | 198789801 | 198799183 | T03249 | 9382    | 5   | hotspot-associated |
| chr4  | 70072160  | 70285818  | T01402 | 213658  | chr4  | 70062193  | 70088108  | T01402 | 25915   | 98  | hotspot-associated |
| chr4  | 70072160  | 70285818  | T01402 | 213658  | chr4  | 70160392  | 70264770  | T01402 | 104378  | 98  | hotspot-associated |
| chr4  | 70142222  | 70261760  | T02539 | 119538  | chr4  | 70190808  | 70264770  | T02539 | 73962   | 97  | hotspot-associated |
| chr4  | 70152740  | 70268157  | T02511 | 115417  | chr4  | 70153463  | 70261759  | T02511 | 108296  | 97  | hotspot-associated |
| chr4  | 70162889  | 70261760  | T03401 | 98871   | chr4  | 70177280  | 70264770  | T03401 | 87490   | 96  | hotspot-associated |

|      |           |           |        |         |      |           |           |        |         |     |                    |
|------|-----------|-----------|--------|---------|------|-----------|-----------|--------|---------|-----|--------------------|
| chr4 | 70162889  | 70261760  | T03445 | 98871   | chr4 | 70160392  | 70264770  | T03445 | 104378  | 96  | hotspot-associated |
| chr4 | 70165722  | 70261760  | T02237 | 96038   | chr4 | 70160392  | 70264770  | T02237 | 104378  | 96  | hotspot-associated |
| chr4 | 70165722  | 70261760  | T02237 | 96038   | chr4 | 70184221  | 70260690  | T02237 | 76469   | 96  | hotspot-associated |
| chr5 | 714831    | 849094    | T02237 | 134263  | chr5 | 734090    | 866073    | T02237 | 131983  | 86  | hotspot-associated |
| chr5 | 714831    | 849094    | T02237 | 134263  | chr5 | 719383    | 849093    | T02237 | 129710  | 86  | hotspot-associated |
| chr5 | 717373    | 849094    | T02539 | 131721  | chr5 | 734090    | 901677    | T02539 | 167587  | 88  | hotspot-associated |
| chr5 | 717373    | 874583    | T02257 | 157210  | chr5 | 734090    | 901677    | T02257 | 167587  | 88  | hotspot-associated |
| chr5 | 719384    | 814246    | T03448 | 94862   | chr5 | 714830    | 748527    | T03448 | 33697   | 87  | hotspot            |
| chr5 | 730867    | 849094    | T02457 | 118227  | chr5 | 745887    | 849093    | T02457 | 103206  | 98  | hotspot-associated |
| chr5 | 1051432   | 1391721   | T02237 |         |      |           |           |        |         | NA  | not validated      |
| chr5 | 68876515  | 70650796  | T02597 | 1774281 | chr5 | 70342727  | 70345397  | T02597 | 2670    | 100 | hotspot            |
| chr5 | 69087097  | 70315414  | T03249 | 1228317 | chr5 | 69087097  | 70315414  | T03249 | 1228317 | 100 | hotspot            |
| chr5 | 69087097  | 70344444  | T01402 | 1257347 | chr5 | 69108248  | 69151466  | T01402 | 43218   | 100 | hotspot            |
| chr5 | 69087097  | 70344444  | T01402 | 1257347 | chr5 | 69274221  | 69506747  | T01402 | 232526  | 100 | hotspot            |
| chr5 | 69087097  | 70344444  | T01402 | 1257347 | chr5 | 69688060  | 69700814  | T01402 | 12754   | 100 | hotspot            |
| chr5 | 69087097  | 70344444  | T01402 | 1257347 | chr5 | 69979510  | 69987295  | T01402 | 7785    | 100 | hotspot            |
| chr5 | 69087097  | 70344444  | T01402 | 1257347 | chr5 | 70161181  | 70330293  | T01402 | 169112  | 100 | hotspot            |
| chr5 | 70441720  | 70650796  | T01402 | 209076  | chr5 | 70426301  | 70507131  | T01402 | 80830   | 100 | hotspot            |
| chr5 | 156526018 | 164133824 | T03448 | 7607806 | chr5 | 156573853 | 159472988 | T03448 | 2899135 | 0   | hotspot-associated |
| chr5 | 156526018 | 164133824 | T03448 | 7607806 | chr5 | 159671194 | 164135198 | T03448 | 4464004 | 0   | hotspot-associated |
| chr7 | 75974196  | 76384959  | T02560 | 410763  | chr7 | 75891314  | 76477399  | T02560 | 586085  | 100 | hotspot            |
| chr7 | 149105718 | 149484098 | T02597 | 378380  | chr7 | 149060871 | 149548751 | T02597 | 487880  | 70  | hotspot-associated |
| chr8 | 7242905   | 7451662   | T01402 | 208757  | chr8 | 7242905   | 7451662   | T01402 | 208757  | 100 | hotspot            |
| chr8 | 7562522   | 7971704   | T01402 | 409182  | chr8 | 7562522   | 7971704   | T01402 | 409182  | 100 | hotspot            |
| chr8 | 39173157  | 39477281  | T03401 | 304124  | chr8 | 39353969  | 39504514  | T03401 | 150545  | 1   | hotspot-associated |
| chr8 | 39352427  | 39506424  | T03187 | 153997  | chr8 | 39352427  | 39506424  | T03187 | 153997  | 2   | hotspot-associated |
| chr9 | 11765283  | 12138404  | T02560 | 373121  | chr9 | 11775234  | 11868161  | T02560 | 92927   | 1   | hotspot-associated |
| chr9 | 11765283  | 12138404  | T02560 | 373121  | chr9 | 12013043  | 12149108  | T02560 | 136065  | 1   | hotspot-associated |
| chr9 | 73827781  | 79830447  | T03413 | 6002666 | chr9 | 73822864  | 79779763  | T03413 | 5956899 | 0   | non-hotspot        |
| chr9 | 73827781  | 79830447  | T03413 | 6002666 | chr9 | 73830596  | 79814193  | T03413 | 5983597 | 0   | non-hotspot        |
