# Supplementary material for: Relative Burden of Large CNVs on a Range of Neurodevelopmental Phenotypes
Source: PubMed Central journal article supplement (PMC3213131; doi:10.1371/journal.pgen.1002334), 2011-11-10
Supplement: pgen.1002334.s010.pdf [file pgen.1002334.s010.pdf]

**Table S3. Global analysis for CNVs in neurodevelopmental disorders**

|                   |            |               |                   |             | Deletions       |                      | Duplications       |                      |
|-------------------|------------|---------------|-------------------|-------------|-----------------|----------------------|--------------------|----------------------|
|                   | Total CNVs | Del/Dup ratio | Percent deletions | Median size | Total deletions | Perc gene disrupting | Total duplications | Perc gene disrupting |
| Controls          | 1,074      | 0.605         | 0.377             | 167,749     | 405             | 0.26                 | 669                | 0.37                 |
| Dyslexia          | 1,041      | 0.587         | 0.370             | 161,522     | 385             | 0.22                 | 656                | 0.42                 |
| Autism<br>No ID   | 923        | 0.482         | 0.325             | 157,556     | 300             | 0.20                 | 623                | 0.43                 |
| Autism<br>with ID | 362        | 0.692         | 0.409             | 168,582     | 148             | 0.22                 | 214                | 0.41                 |
| Autism<br>ID      | 1,285      | 0.535         | 0.349             | 167,749     | 448             | 0.21                 | 837                | 0.43                 |
| ID/MCA            | 1,306      | 0.499         | 0.333             | 225,272     | 435             | 0.27                 | 871                | 0.43                 |
| Combined<br>ID    | 380        | 0.551         | 0.355             | 305,580     | 135             | 0.36                 | 245                | 0.41                 |
| Combined<br>ID    | 1,686      | 0.511         | 0.338             | 247,603     | 570             | 0.29                 | 1,116              | 0.43                 |
