# Supplementary material for: Relative Burden of Large CNVs on a Range of Neurodevelopmental Phenotypes
Source: PubMed Central journal article supplement (PMC3213131; doi:10.1371/journal.pgen.1002334), 2011-11-10
Supplement: pgen.1002334.s011.pdf [file pgen.1002334.s011.pdf]

**Table S4A. Characteristics of dyslexia cases from UW**

| Sample code | proband | birthdate  | famid | sex | ethnicity       | comment                                                                                             | viq | wid | watt | wrat3sp | wiat2sp | wiatssp |
|-------------|---------|------------|-------|-----|-----------------|-----------------------------------------------------------------------------------------------------|-----|-----|------|---------|---------|---------|
| 852         | 1       | 12/25/1981 | 010   | M   | Caucasian       | In writing tutorial and imaging studies.                                                            | 112 | 95  | 92   | 88      | .       | 80      |
| 782         | 1       | 9/10/1982  | 012   | F   | Native American | math is very strong. In writing tutorial.                                                           | 94  | 82  | 80   | 78      | .       | 91      |
| 959         | 1       | 1/8/1983   | 025   | M   | Caucasian       | in writing tutorial. Consultation with mom re: IEP                                                  | 100 | 68  | 72   | 75      | .       | 72      |
| 836         | 1       | 4/21/1985  | 042   | M   | Caucasian       | In reading tutorial.                                                                                | 111 | 92  | 96   | 102     | .       | 91      |
| 1102        | 1       | 6/14/1982  | 047   | F   | Caucasian       | .                                                                                                   | 122 | 86  | 91   | 90      | .       | 88      |
| 1114        | 1       | 12/13/1980 | 053   | M   | Caucasian       | .                                                                                                   | 100 | 71  | 76   | 78      | .       | 74      |
| 1633        | 1       | 2/14/1982  | 073   | F   | Caucasian       | .                                                                                                   | 105 | 76  | 82   | 83      | .       | 79      |
| 957         | 1       | 1/18/1984  | 075   | F   | Caucasian       | Consulted with school for IEP - sent phonological training program.                                 | 105 | 74  | 79   | 85      | .       | 80      |
| 1163        | 1       | 2/15/1985  | 076   | M   | Caucasian       | language delay - speech therapy for articulation problems. consultation with school - tutoring 1998 | 95  | 59  | 71   | 63      | .       | 73      |
| 1149        | 1       | 11/26/1983 | 087   | M   | Caucasian       | Very high IQ (147)                                                                                  | 147 | 96  | 80   | 96      | .       | 82      |
| 1182        | 1       | 3/2/1985   | 094   | M   | Caucasian       | .                                                                                                   | 110 | 78  | 83   | 80      | .       | 84      |
| 1201        | 1       | 11/2/1985  | 096   | M   | Caucasian       | .                                                                                                   | 129 | 69  | 65   | 65      | .       | 79      |
| 1311        | 1       | 4/15/1985  | 105   | M   | Caucasian       | .                                                                                                   | 110 | 68  | 77   | 72      | .       | 80      |
| 1287        | 1       | 5/13/1986  | 106   | M   | Caucasian       | .                                                                                                   | 110 | 81  | 88   | 83      | .       | 91      |
| 1260        | 1       | 7/3/1986   | 111   | M   | Caucasian       | "Some pregnancy complications, toxemia."                                                            | 106 | 70  | 86   | 83      | .       | 91      |
| 1328        | 1       | 2/10/1981  | 114   | M   | Caucasian       | .                                                                                                   | 98  | 83  | 89   | 75      | .       | 77      |
| 1349        | 1       | 5/25/1984  | 119   | M   | Caucasian       | "Premature birth, many complications, identified early"                                             | 95  | 67  | 86   | 81      | .       | 82      |
| 1358        | 1       | 10/7/1983  | 122   | F   | Caucasian       | .                                                                                                   | 110 | 69  | 84   | 81      | .       | 81      |
| 1369        | 1       | 10/8/1982  | 126   | F   | Caucasian       | .                                                                                                   | 93  | 78  | 75   | 80      | .       | 74      |

|      |   |           |     |   |                     |   |     |     |     |     |     |    |
|------|---|-----------|-----|---|---------------------|---|-----|-----|-----|-----|-----|----|
| 1554 | 1 | 1/26/1982 | 132 | M | Caucasian           | . | 118 | 70  | 79  | 68  | .   | 65 |
| 1840 | 1 | 3/29/1987 | 139 | M | Caucasian           | . | 101 | 63  | 82  | 70  | .   | 76 |
| 2250 | 1 | 1/0/1900  | 202 | M | Caucasian           | . | 140 | 65  | 73  | 69  | 68  | .  |
| 2236 | 1 | 1/0/1900  | 204 | F | Caucasian           | . | 94  | 52  | 45  | 62  | 59  | .  |
| 2284 | 1 | 1/0/1900  | 205 | M | Caucasian           | . | 117 | 83  | 96  | 80  | 93  | .  |
| 2244 | 1 | 1/0/1900  | 207 | M | Caucasian           | . | 99  | 64  | 81  | 69  | 67  | .  |
| 2264 | 1 | 1/0/1900  | 209 | M | Caucasian           | . | 106 | 53  | 65  | 65  | 60  | .  |
| 2242 | 1 | 1/0/1900  | 210 | M | Caucasian           | . | 98  | 83  | 92  | 90  | 85  | .  |
| 2235 | 1 | 1/0/1900  | 212 | M | Caucasian           | . | 125 | 93  | 83  | 87  | 77  | .  |
| 2266 | 1 | 1/0/1900  | 214 | F | Caucasian           | . | 98  | 75  | 74  | 82  | 77  | .  |
| 2280 | 1 | 1/0/1900  | 215 | F | Caucasian           | . | 92  | 76  | 84  | 81  | 76  | .  |
| 2293 | 1 | 1/0/1900  | 216 | M | Caucasian           | . | 100 | 93  | 83  | 85  | 84  | .  |
| 2330 | 1 | 1/0/1900  | 220 | M | Asian               | . | 117 | 105 | 93  | 78  | 76  | .  |
| 2288 | 1 | 1/0/1900  | 221 | F | Caucasian           | . | 123 | 89  | 103 | 87  | 81  | .  |
| 2341 | 1 | 1/0/1900  | 223 | M | African<br>American | . | 118 | 92  | 96  | 83  | 84  | .  |
| 2335 | 1 | 1/0/1900  | 224 | M | Caucasian           | . | 104 | 94  | 95  | 93  | 82  | .  |
| 2407 | 1 | 1/0/1900  | 225 | M | Caucasian           | . | 117 | 95  | 91  | 83  | 76  | .  |
| 2328 | 1 | 1/0/1900  | 227 | M | Caucasian           | . | 117 | 66  | 79  | 73  | 65  | .  |
| 2411 | 1 | 1/0/1900  | 228 | F | Caucasian           | . | 104 | 95  | 89  | 84  | 82  | .  |
| 2394 | 1 | 1/0/1900  | 229 | M | Caucasian           | . | 115 | 89  | 83  | 81  | 78  | .  |
| 2364 | 1 | 1/0/1900  | 230 | F | Caucasian           | . | 104 | 84  | 81  | 88  | 86  | .  |
| 2315 | 1 | 1/0/1900  | 231 | M | Caucasian           | . | 119 | 93  | 94  | 87  | 96  | .  |
| 2349 | 1 | 1/0/1900  | 232 | M | Caucasian           | . | 125 | 99  | 86  | 93  | 86  | .  |
| 2342 | 1 | 1/0/1900  | 233 | M | Caucasian           | . | 111 | 76  | 67  | 82  | 76  | .  |
| 2333 | 1 | 1/0/1900  | 237 | F | Asian               | . | 101 | 88  | 88  | 81  | 80  | .  |
| 2370 | 1 | 1/0/1900  | 239 | M | Caucasian           | . | 90  | 59  | 67  | 76  | 84  | .  |
| 2397 | 1 | 1/0/1900  | 240 | M | Caucasian           | . | 128 | 82  | 87  | 88  | 78  | .  |
| 2400 | 1 | 1/0/1900  | 241 | M | Caucasian           | . | 119 | 67  | 82  | 75  | 66  | .  |
| 2382 | 1 | 1/0/1900  | 242 | F | Caucasian           | . | 105 | 91  | 83  | 87  | 86  | .  |
| 2383 | 1 | 1/0/1900  | 243 | F | Caucasian           | . | 106 | 89  | 87  | 80  | 83  | .  |
| 2391 | 1 | 1/0/1900  | 244 | M | Caucasian           | . | 104 | 69  | 67  | 75  | 75  | .  |
| 2450 | 1 | 1/0/1900  | 246 | F | Caucasian           | . | 118 | 86  | 88  | 87  | 90  | .  |
| 2446 | 1 | 1/0/1900  | 249 | F | Caucasian           | . | 142 | 132 | 127 | 104 | 105 | .  |
| 2449 | 1 | 1/0/1900  | 250 | F | Caucasian           | . | 98  | 63  | 62  | 75  | 65  | .  |
| 2556 | 1 | 1/0/1900  | 258 | M | Caucasian           | . | 99  | 96  | 100 | 100 | 92  | .  |
| 2508 | 1 | 1/0/1900  | 259 | F | Other               | . | 105 | 92  | 78  | 87  | 84  | .  |
| 2478 | 1 | 1/0/1900  | 260 | M | Caucasian           | . | 125 | 88  | 77  | 69  | 57  | .  |
| 2477 | 1 | 1/0/1900  | 261 | F | African<br>American | . | 137 | 68  | 84  | 79  | 73  | .  |
| 2522 | 1 | 1/0/1900  | 265 | M | Caucasian           | . | 105 | 85  | 84  | 90  | 83  | .  |
| 2818 | 1 | 1/0/1900  | 266 | F | Caucasian           | . | 124 | 116 | 113 | 116 | 110 | .  |

|      |   |            |     |   |                    |                                                                                 |     |     |     |     |     |    |
|------|---|------------|-----|---|--------------------|---------------------------------------------------------------------------------|-----|-----|-----|-----|-----|----|
| 2618 | 1 | 1/0/1900   | 267 | M | Caucasian          | .                                                                               | 92  | 74  | 66  | 69  | 70  | .  |
| 2545 | 1 | 1/0/1900   | 268 | M | Caucasian          | .                                                                               | 112 | 75  | 79  | 85  | 87  | .  |
| 2585 | 1 | 1/0/1900   | 270 | M | Caucasian          | .                                                                               | 90  | 63  | 49  | 69  | 69  | .  |
| 2626 | 1 | 1/0/1900   | 271 | F | Asian              | .                                                                               | 100 | 56  | 74  | 81  | 76  | .  |
| 2620 | 1 | 1/0/1900   | 272 | F | Caucasian          | .                                                                               | 111 | 96  | 96  | 90  | 90  | .  |
| 2551 | 1 | 1/0/1900   | 277 | M | Caucasian          | .                                                                               | 107 | 62  | 66  | 73  | 67  | .  |
| 2564 | 1 | 1/0/1900   | 278 | F | Caucasian          | .                                                                               | 110 | 70  | 84  | 82  | 80  | .  |
| 2568 | 1 | 1/0/1900   | 279 | M | Caucasian          | .                                                                               | 115 | 96  | 91  | 95  | 94  | .  |
| 2558 | 1 | 1/0/1900   | 280 | F | Caucasian          | .                                                                               | 105 | 88  | 98  | 93  | 94  | .  |
| 2774 | 1 | 1/0/1900   | 282 | M | Caucasian          | .                                                                               | 113 | 99  | 104 | 98  | 111 | .  |
| 2602 | 1 | 1/0/1900   | 284 | M | Caucasian          | .                                                                               | 119 | 77  | 68  | 78  | 70  | .  |
| 2609 | 1 | 1/0/1900   | 285 | M | Caucasian          | .                                                                               | 101 | 82  | 68  | 73  | 76  | .  |
| 2619 | 1 | 1/0/1900   | 286 | M | Caucasian          | .                                                                               | 100 | 88  | 73  | 77  | 73  | .  |
| 2642 | 1 | 1/0/1900   | 288 | F | Caucasian          | .                                                                               | 90  | 73  | 64  | 78  | 76  | .  |
| 2804 | 1 | 1/0/1900   | 290 | M | Caucasian          | .                                                                               | 107 | 56  | 81  | 87  | 87  | .  |
| 2760 | 1 | 1/0/1900   | 294 | M | Other              | .                                                                               | 110 | 90  | 91  | 78  | 71  | .  |
| 2830 | 1 | 1/0/1900   | 304 | M | Caucasian          | .                                                                               | 110 | 98  | 100 | 88  | 79  | .  |
| 2835 | 1 | 8/20/1984  | 307 | M | Caucasian          | .                                                                               | 104 | 96  | 94  | 88  | 91  | .  |
| 2824 | 1 | 1/0/1900   | 310 | F | Caucasian          | .                                                                               | 112 | 92  | 96  | 85  | 88  | .  |
| 2858 | 1 | 3/18/1985  | 313 | M | Caucasian          | .                                                                               | 100 | 83  | 78  | 78  | 76  | .  |
| 2893 | 1 | 4/18/1988  | 317 | M | Caucasian          | .                                                                               | 135 | 111 | 106 | 96  | 96  | .  |
| 2877 | 1 | 1/0/1900   | 318 | F | Unknown            | .                                                                               | 127 | 101 | 93  | 85  | 79  | .  |
| 2867 | 1 | 2/7/1988   | 319 | M | Caucasian          | .                                                                               | 122 | 102 | 97  | 96  | 94  | .  |
| 2888 | 1 | 11/6/1987  | 320 | F | Caucasian          | .                                                                               | 107 | 98  | 94  | 85  | 89  | .  |
| 2881 | 1 | 6/30/1988  | 321 | F | Caucasian          | .                                                                               | 119 | 96  | 93  | 96  | 92  | .  |
| 2864 | 1 | 3/21/1983  | 324 | M | Native<br>American | .                                                                               | 115 | 92  | 84  | 75  | 73  | .  |
| 2937 | 1 | 9/27/1987  | 330 | F | Caucasian          | .                                                                               | 125 | 98  | 96  | 90  | 87  | .  |
| 2944 | 1 | 4/6/1986   | 331 | M | Caucasian          | .                                                                               | 111 | 86  | 79  | 87  | 86  | .  |
| 2954 | 1 | 12/20/1986 | 334 | M | Caucasian          | .                                                                               | 95  | 94  | 78  | 85  | 80  | .  |
| 2967 | 1 | 12/28/1986 | 337 | F | Caucasian          | .                                                                               | 123 | 97  | 95  | 101 | 98  | .  |
| 3017 | 1 | 7/6/1987   | 344 | M | Caucasian          | .                                                                               | 99  | 87  | 77  | 90  | 84  | .  |
| 3015 | 1 | 6/15/1989  | 345 | F | Caucasian          | .                                                                               | 111 | 79  | 77  | 75  | 78  | .  |
| 3395 | 1 | 3/15/1989  | 353 | M | Unknown            | .                                                                               | 99  | 92  | 83  | 88  | 94  | .  |
| 3389 | 1 | 3/23/1988  | 355 | M | Unknown            | .                                                                               | 105 | 39  | 57  | 65  | 49  | .  |
| 3397 | 1 | 11/11/1992 | 357 | M | Unknown            | .                                                                               | 122 | 105 | 105 | 90  | 101 | .  |
| 874  | 1 | 5/7/1981   | 001 | M | Caucasian          | Is in reading<br>tutoring with<br>Sylvia (older<br>group). ADHD<br>Inattentive. | 115 | 91  | 96  | 93  | .   | 91 |
| 751  | 1 | 1/29/1983  | 002 | F | Caucasian          | Was in pilot<br>tutorial for                                                    | 106 | 83  | 91  | 84  | .   | 93 |

|      |   |            |     |   |                 |                                                                                                                                                          |     |     |     |     |   |     |
|------|---|------------|-----|---|-----------------|----------------------------------------------------------------------------------------------------------------------------------------------------------|-----|-----|-----|-----|---|-----|
|      |   |            |     |   |                 | reading/writing.                                                                                                                                         |     |     |     |     |   |     |
| 731  | 1 | 4/27/1983  | 003 | M | Caucasian       | math is strong. Was in pilot reading/writing tutorial.                                                                                                   | 123 | 109 | 96  | 105 | . | 105 |
| 875  | 1 | 2/19/1983  | 004 | F | Caucasian       | was in pilot reading/writing tutorial.                                                                                                                   | 119 | 107 | 105 | 113 | . | 110 |
| 641  | 1 | 5/31/1984  | 005 | F | Caucasian       | "Very poor on orthographic choice; couldn't complete. Late sentences, offered tutoring but she dropped out."                                             | 90  | 81  | 85  | 90  | . | 82  |
| 924  | 1 | 8/4/1983   | 006 | M | Native American | offered tutoring - dropped out because of transportation problems.                                                                                       | 90  | 75  | 80  | 82  | . | 86  |
| 938  | 1 | 5/16/1981  | 009 | F | Caucasian       | In reading tutorial for older students.                                                                                                                  | 117 | 96  | 89  | 85  | . | 87  |
| 865  | 1 | 4/17/1982  | 011 | M | Caucasian       | In reading and writing tutorials and brain imaging. ADHD Inattentive but no dr. diagnosis.                                                               | 111 | 74  | 80  | 81  | . | 89  |
| 854  | 1 | 12/29/1981 | 013 | M | Caucasian       | delayed in single words and sentences.                                                                                                                   | 129 | 74  | 63  | 70  | . | 68  |
| 1026 | 1 | 1/0/1900   | 014 | M | Caucasian       | family dropped from study                                                                                                                                |     |     |     |     |   |     |
| 898  | 1 | 12/4/1980  | 015 | M | Caucasian       | "mild bilateral hearing loss. 3 1/2 uneven language development. Services in physical therapy, speech services, and special education. ADHD INattentive" | 110 | 102 | 96  | 85  | . | 83  |
| 1456 | 1 | 6/19/1984  | 016 | M | Caucasian       | .                                                                                                                                                        | 125 | 88  | 90  | 90  | . | 94  |
| 762  | 1 | 2/8/1984   | 018 | M | Caucasian       | hypertonia as an infant. has had a lot of special                                                                                                        | 90  | 92  | 92  | 76  | . | 86  |

---

|      |   |            |     |   |                 |                                                                                                                                             |     |     |    |    |   |     |
|------|---|------------|-----|---|-----------------|---------------------------------------------------------------------------------------------------------------------------------------------|-----|-----|----|----|---|-----|
| 838  | 1 | 4/19/1981  | 019 | F | Caucasian       | education services.                                                                                                                         | 119 | 95  | 89 | 82 | . | 81  |
| 844  | 1 | 10/2/1982  | 021 | M | Caucasian       | was in pilot for reading/writing tutorial                                                                                                   | 110 | 78  | 81 | 87 | . | 85  |
| 1045 | 1 | 7/5/1981   | 022 | M | Caucasian       | .                                                                                                                                           | 107 | 92  | 78 | 88 | . | 79  |
| 948  | 1 | 9/1/1982   | 023 | F | Caucasian       | in writing tutorial                                                                                                                         | 128 | 82  | 89 | 81 | . | 85  |
| 886  | 1 | 9/23/1982  | 024 | F | Caucasian       | Is in the writing tutorial.                                                                                                                 | 111 | 85  | 89 | 81 | . | 87  |
| 908  | 1 | 10/24/1982 | 027 | M | Caucasian       | Was in reading tutorial; dropped out.                                                                                                       | 112 | 74  | 77 | 78 | . | 81  |
| 879  | 1 | 9/13/1983  | 029 | M | Caucasian       | In reading tutorial.                                                                                                                        |     |     |    |    |   |     |
| 794  | 1 | 5/3/1983   | 030 | M | Caucasian       | "math is strong, writing tutorial"                                                                                                          | 98  | 74  | 78 | 81 | . | 82  |
| 769  | 1 | 2/28/1985  | 032 | M | Caucasian       | In reading tutoring.                                                                                                                        | 112 | 93  | 94 | 90 | . | 91  |
| 799  | 1 | 7/1/1983   | 034 | M | Caucasian       | Was in writing tutorial but dropped out because of transportation problems.                                                                 | 125 | 107 | 96 | 97 | . | 104 |
| 824  | 1 | 10/24/1982 | 035 | M | Asian           | "In writing, tutoring and imaging studies."                                                                                                 | 105 | 63  | 71 | 72 | . | 72  |
| 876  | 1 | 10/23/1984 | 036 | M | Caucasian       | Is in reading tutorial. Genotyped at Marshfield.                                                                                            | 141 | 69  | 89 | 82 | . | 85  |
| 781  | 1 | 12/7/1982  | 037 | M | Native American | Based on tests at the UW in 8/96 and by private testing in 5/96. Private tutoring in Oregon.                                                | 115 | 79  | 82 | 78 | . | 87  |
| 793  | 1 | 4/20/1983  | 038 | F | Caucasian       | very strong in math. consulted with school.                                                                                                 | 115 | 85  | 75 | 84 | . | 90  |
| 776  | 1 | 3/9/1982   | 039 | M | Caucasian       | "ritalin no writing sample score. Offered writing tutorial - declined. Diagnosed with ADHD but on Ritalin, so questionnaire doesn't reflect | 106 | 89  | 90 | 96 | . | 92  |

---

---

|     |   |            |     |   |             |                                                                                                                                                  |     |    |    |    |   |     |
|-----|---|------------|-----|---|-------------|--------------------------------------------------------------------------------------------------------------------------------------------------|-----|----|----|----|---|-----|
| 909 | 1 | 2/2/1983   | 040 | M | Caucasian   | symptoms."<br>"Anxious by history. Receives counseling. In writing tutorial, dropped out."                                                       | 128 | 82 | 95 | 81 | . | 75  |
| 816 | 1 | 3/6/1982   | 041 | F | Caucasian   | Consulted with school via written report and conversation with mother. In reading tutorial (older group)                                         | 107 | 90 | 98 | 96 | . | 100 |
| 857 | 1 | 10/14/1982 | 043 | F | Caucasian   | received reading tutoring (older group)                                                                                                          | 100 | 82 | 88 | 87 | . | 81  |
| 889 | 1 | 4/16/1983  | 045 | M | Hispanic    | not on ritalin - change handedness to 100% right. IN reading tutoring and imaging studies. ADHD Combined                                         | 119 | 65 | 80 | 78 | . | 80  |
| 803 | 1 | 3/31/1985  | 048 | F | Caucasian   | no GORT oral reading quotient<br>Consulted with father -- offered tutoring -- didn't participate.                                                | 106 | 91 | 85 | 94 | . | 96  |
| 801 | 1 | 7/14/1981  | 049 | M | Caucasian   | lives too far away for tutoring.                                                                                                                 | 98  | 82 | 82 | 85 | . | 79  |
| 0   | 1 | 6/18/1983  | 050 | M | Caucasian   | Severely learning disabled in all domains.<br>Unclear what role ADD plays in his learning problems. Has been very resistant in writing tutorial. | 127 | 44 | 54 | 63 | . | 69  |
| 797 | 1 | 12/30/1980 | 054 | F | East Indian | Only affected in spelling at this time. Mild phonological problems. May have compensated                                                         | 107 | 97 | 95 | 90 | . | 83  |

---

|      |   |            |     |   |                 |                                                                                                                      |     |     |     |    |   |     |
|------|---|------------|-----|---|-----------------|----------------------------------------------------------------------------------------------------------------------|-----|-----|-----|----|---|-----|
| 872  | 1 | 6/24/1982  | 056 | F | Caucasian       | by this age (6th grade). Math is strong very high IQ - was in tutoring - dropped out because of scheduling problems. | 131 | 108 | 101 | 88 | . | 92  |
| 0    | 1 | 7/19/1983  | 059 | F | Caucasian       | .                                                                                                                    | 101 | 55  | 72  | 77 | . | 75  |
| 1096 | 1 | 2/8/1982   | 060 | M | Caucasian       | .                                                                                                                    | 112 | 74  | 76  | 76 | . | 72  |
| 887  | 1 | 1/22/1980  | 061 | F | Caucasian       | In reading tutorial for older students.ADHD Inattentive                                                              | 98  | 71  | 82  | 75 | . | 73  |
| 923  | 1 | 9/4/1980   | 062 | F | Caucasian       | language delay. Tutoring summer 1988. Taking Ritalin so questionnaire reflects behavior on medication.               | 99  | 67  | 65  | 78 | . | 73  |
| 893  | 1 | 4/5/1981   | 063 | M | Caucasian       | Consulted with tutor and school.                                                                                     | 98  | 67  | 66  | 83 | . | 73  |
| 894  | 1 | 6/23/1984  | 064 | M | Caucasian       | language delays - age 3                                                                                              | 112 | 82  | 88  | 91 | . | 88  |
| 899  | 1 | 4/3/1983   | 066 | M | Native American | math strong - delayed in talking in sentences. In reading and writing tutorial.                                      | 104 | 80  | 74  | 90 | . | 87  |
| 915  | 1 | 7/11/1983  | 067 | M | Asian           | In reading tutorial for older students.                                                                              | 135 | 107 | 98  | 99 | . | 105 |
| 939  | 1 | 6/9/1985   | 070 | F | Caucasian       | 2 months premature but no reported language delays.                                                                  | 98  | 61  | 70  | 82 | . | 87  |
| 922  | 1 | 6/26/1981  | 071 | M | Caucasian       | .                                                                                                                    | 92  | 93  | 92  | 83 | . | 83  |
| 1212 | 1 | 2/13/1985  | 072 | M | Caucasian       | .                                                                                                                    | 144 | 103 | 92  | 97 | . | 95  |
| 956  | 1 | 10/23/1982 | 074 | M | Caucasian       | Tutoring summer 1998.                                                                                                | 108 | 85  | 67  | 76 | . | 86  |
| 1004 | 1 | 4/30/1981  | 077 | M | Caucasian       | Eligible for tutoring in summer 1998                                                                                 | 107 | 89  | 65  | 75 | . | 76  |
| 1012 | 1 | 1/14/1983  | 078 | F | Caucasian       | Consultation with mother -- summer                                                                                   | 111 | 99  | 88  | 85 | . | 78  |

|      |   |            |     |   |                  |                                                                                                                |     |     |     |     |   |     |
|------|---|------------|-----|---|------------------|----------------------------------------------------------------------------------------------------------------|-----|-----|-----|-----|---|-----|
|      |   |            |     |   |                  | tutoring 1998.                                                                                                 |     |     |     |     |   |     |
| 1022 | 1 | 7/12/1982  | 079 | M | Caucasian        | language milestones were mildly delayed. Tutoring summer 1988 -- will drive from Bellingham. ADHD Inattentive. | 92  | 49  | 64  | 65  | . | 68  |
| 1037 | 1 | 10/8/1982  | 081 | F | Caucasian        | .                                                                                                              | 98  | 64  | 79  | 73  | . | 74  |
| 1047 | 1 | 1/0/1900   | 083 | F | Unknown          | .                                                                                                              |     |     |     |     |   |     |
| 1060 | 1 | 5/6/1986   | 084 | M | Caucasian        | Consultation with mother who gave her instructional materials. Tutoring Summer 1988.                           | 124 | 92  | 97  | 95  | . | 98  |
| 1081 | 1 | 8/16/1985  | 085 | M | Caucasian        | .                                                                                                              | 110 | 100 | 92  | 89  | . | 96  |
| 1121 | 1 | 5/22/1985  | 086 | M | Caucasian        | .                                                                                                              | 90  | 67  | 76  | 76  | . | 73  |
| 1133 | 1 | 7/4/1983   | 088 | F | Hispanic         | High IQ                                                                                                        | 126 | 107 | 99  | 92  | . | 103 |
| 1136 | 1 | 6/17/1982  | 089 | M | Caucasian        | High IQ. Diagnosed as ADHD.                                                                                    | 125 | 85  | 90  | 85  | . | 81  |
| 1161 | 1 | 12/26/1984 | 090 | M | Caucasian        | .                                                                                                              | 123 | 99  | 94  | 91  | . | 87  |
| 1173 | 1 | 1/8/1982   | 091 | M | Caucasian        | .                                                                                                              | 128 | 67  | 81  | 67  | . | 73  |
| 1169 | 1 | 1/0/1900   | 092 | M | Caucasian        | .                                                                                                              |     |     |     |     |   |     |
| 1221 | 1 | 5/9/1983   | 093 | M | Caucasian        | ADHD Inattentive                                                                                               | 112 | 103 | 95  | 92  | . | 96  |
| 1209 | 1 | 11/9/1982  | 095 | M | Caucasian        | .                                                                                                              | 106 | 95  | 108 | 104 | . | 98  |
| 1210 | 1 | 10/19/1984 | 097 | M | Caucasian        | .                                                                                                              | 133 | 106 | 87  | 82  | . | 80  |
| 1252 | 1 | 4/2/1982   | 098 | M | Caucasian        | .                                                                                                              | 93  | 63  | 70  | 72  | . | 70  |
| 1280 | 1 | 3/31/1985  | 099 | M | Caucasian        | .                                                                                                              | 118 | 69  | 74  | 61  | . | 76  |
| 1272 | 1 | 10/8/1980  | 100 | M | African American | .                                                                                                              | 90  | 68  | 80  | 69  | . | 75  |
| 1240 | 1 | 5/10/1983  | 101 | M | Caucasian        | .                                                                                                              | 117 | 88  | 88  | 90  | . | 80  |
| 1379 | 1 | 7/2/1982   | 102 | M | Caucasian        | very affected with ADHD. ADHD Combined                                                                         | 118 | 99  | 94  | 86  | . | 83  |
| 1340 | 1 | 5/24/1984  | 103 | F | Caucasian        | .                                                                                                              | 102 | 91  | 80  | 78  | . | 86  |
| 1242 | 1 | 5/22/1983  | 104 | F | Caucasian        | .                                                                                                              | 112 | 83  | 89  | 88  | . | 90  |
| 1305 | 1 | 5/19/1985  | 107 | M | Caucasian        | .                                                                                                              | 123 | 94  | 98  | 84  | . | 88  |
| 1355 | 1 | 5/18/1983  | 108 | M | Caucasian        | .                                                                                                              | 101 | 59  | 67  | 62  | . | 70  |
| 1263 | 1 | 3/20/1984  | 109 | M | Caucasian        | .                                                                                                              | 90  | 41  | 65  | 66  | . | 68  |
| 1275 | 1 | 5/18/1980  | 110 | M | Caucasian        | .                                                                                                              | 100 | 80  | 84  | 71  | . | 67  |

|      |   |            |     |   |                  |                                                                                                       |     |     |     |     |    |     |
|------|---|------------|-----|---|------------------|-------------------------------------------------------------------------------------------------------|-----|-----|-----|-----|----|-----|
| 1257 | 1 | 11/21/1982 | 112 | F | Caucasian        | .                                                                                                     | 94  | 81  | 78  | 88  | .  | 82  |
| 1284 | 1 | 4/26/1982  | 113 | F | Caucasian        | "Fine and gross motor delays, diagnosed with 'sensory integration disorder', problems since infancy." | 105 | 83  | 89  | 80  | .  | 0   |
| 1278 | 1 | 10/5/1981  | 115 | M | Caucasian        | .                                                                                                     | 101 | 58  | 95  | 75  | .  | 71  |
| 1342 | 1 | 6/5/1982   | 116 | F | African American | .                                                                                                     | 104 | 84  | 78  | 80  | .  | 75  |
| 1367 | 1 | 7/5/1980   | 117 | M | Caucasian        | .                                                                                                     | 105 | 88  | 100 | 74  | .  | 79  |
| 1335 | 1 | 3/22/1982  | 120 | F | Caucasian        | .                                                                                                     | 99  | 72  | 86  | 80  | .  | 73  |
| 1319 | 1 | 2/24/1982  | 121 | F | Native American  | ADHD Combined                                                                                         | 94  | 71  | 82  | 78  | .  | 83  |
| 1395 | 1 | 4/21/1980  | 127 | M | Hispanic         | .                                                                                                     | 100 | 81  | 78  | 67  | .  | 70  |
| 1403 | 1 | 1/31/1984  | 128 | M | Caucasian        | .                                                                                                     | 112 | 80  | 75  | 87  | .  | 85  |
| 1409 | 1 | 10/30/1982 | 129 | M | Caucasian        | .                                                                                                     | 128 | 96  | 85  | 93  | .  | 93  |
| 1411 | 1 | 7/18/1984  | 130 | M | Caucasian        | .                                                                                                     | 112 | 83  | 79  | 77  | .  | 82  |
| 1417 | 1 | 9/30/1984  | 131 | M | Caucasian        | .                                                                                                     | 98  | 48  | 68  | 79  | .  | 70  |
| 1583 | 1 | 8/9/1984   | 133 | M | Caucasian        | .                                                                                                     | 112 | 106 | 110 | 110 | .  | 118 |
| 1726 | 1 | 4/20/1982  | 134 | M | Caucasian        | .                                                                                                     | 90  | 76  | 85  | 80  | .  | 73  |
| 1759 | 1 | 6/19/1984  | 135 | M | Caucasian        | .                                                                                                     | 90  | 55  | 74  | 68  | .  | 69  |
| 1714 | 1 | 6/11/1987  | 136 | M | Caucasian        | .                                                                                                     | 135 | 96  | 100 | 106 | .  | 103 |
| 1806 | 1 | 4/4/1983   | 137 | F | Caucasian        | .                                                                                                     | 122 | 89  | 77  | 88  | .  | 86  |
| 2231 | 1 | 1/0/1900   | 201 | M | Caucasian        | .                                                                                                     | 119 | 99  | 93  | 86  | 75 | .   |
| 2232 | 1 | 1/0/1900   | 203 | M | Caucasian        | .                                                                                                     | 118 | 84  | 80  | 83  | 81 | .   |
| 2229 | 1 | 1/0/1900   | 206 | M | Caucasian        | .                                                                                                     | 94  | 73  | 82  | 75  | 74 | .   |
| 2290 | 1 | 1/0/1900   | 208 | M | Caucasian        | Only 1.7 micrograms. Need a blood sample.                                                             | 93  | 93  | 91  | 85  | 84 | .   |
|      |   |            |     |   |                  | Second sample taken with Ora Gene sputum kit 2004.                                                    |     |     |     |     |    |     |
| 2270 | 1 | 1/0/1900   | 211 | M | Caucasian        | .                                                                                                     | 110 | 84  | 87  | 75  | 71 | .   |
| 2274 | 1 | 1/0/1900   | 217 | M | Caucasian        | .                                                                                                     | 118 | 93  | 88  | 74  | 76 | .   |
| 2286 | 1 | 1/0/1900   | 218 | M | Caucasian        | .                                                                                                     | 119 | 80  | 89  | 85  | 79 | .   |
| 2300 | 1 | 1/0/1900   | 222 | M | Caucasian        | .                                                                                                     | 104 | 113 | 109 | 94  | 96 | .   |
| 2314 | 1 | 1/0/1900   | 226 | M | Caucasian        | .                                                                                                     | 98  | 57  | 72  | 75  | 71 | .   |
| 2346 | 1 | 1/0/1900   | 235 | M | Caucasian        | .                                                                                                     | 119 | 109 | 101 | 92  | 93 | .   |
| 2369 | 1 | 1/0/1900   | 238 | M | Caucasian        | .                                                                                                     | 92  | 74  | 80  | 74  | 70 | .   |
| 2398 | 1 | 1/0/1900   | 245 | M | Caucasian        | .                                                                                                     | 107 | 98  | 90  | 90  | 80 | .   |

|      |   |            |     |   |           |                    |     |     |     |     |     |   |
|------|---|------------|-----|---|-----------|--------------------|-----|-----|-----|-----|-----|---|
| 2479 | 1 | 1/0/1900   | 247 | M | Caucasian | .                  | 101 | 65  | 83  | 69  | 60  | . |
| 2418 | 1 | 1/0/1900   | 248 | M | Caucasian | .                  | 98  | 84  | 99  | 80  | 76  | . |
| 2435 | 1 | 1/0/1900   | 251 | F | Unknown   | .                  |     |     |     |     |     | . |
| 2448 | 1 | 1/0/1900   | 252 | M | Caucasian | .                  | 117 | 71  | 69  | 81  | 78  | . |
| 2510 | 1 | 1/0/1900   | 253 | M | Caucasian | .                  | 129 | 97  | 90  | 94  | 96  | . |
| 2525 | 1 | 1/0/1900   | 255 | M | Caucasian | .                  | 118 | 105 | 101 | 111 | 107 | . |
| 2484 | 1 | 1/0/1900   | 256 | M | Caucasian | .                  | 113 | 90  | 94  | 85  | 86  | . |
| 2517 | 1 | 1/0/1900   | 257 | M | Caucasian | .                  | 93  | 90  | 82  | 82  | 85  | . |
| 2513 | 1 | 1/0/1900   | 262 | M | Caucasian | .                  | 110 | 89  | 88  | 95  | 88  | . |
| 2493 | 1 | 1/0/1900   | 263 | F | Caucasian | .                  | 113 | 81  | 79  | 88  | 87  | . |
| 2532 | 1 | 1/0/1900   | 264 | F | Caucasian | .                  | 139 | 99  | 90  | 90  | 87  | . |
| 2499 | 1 | 1/0/1900   | 269 | M | Unknown   | .                  |     |     |     |     |     | . |
| 2624 | 1 | 1/0/1900   | 274 | F | Asian     | .                  | 99  | 64  | 77  | 78  | 80  | . |
| 2552 | 1 | 1/0/1900   | 275 | F | Unknown   | .                  |     |     |     |     |     | . |
| 2614 | 1 | 1/0/1900   | 276 | F | Caucasian | .                  | 99  | 89  | 97  | 94  | 87  | . |
| 2569 | 1 | 1/0/1900   | 281 | F | Caucasian | .                  | 90  | 83  | 85  | 90  | 77  | . |
| 2658 | 1 | 1/0/1900   | 283 | M | Caucasian | .                  | 131 | 115 | 100 | 92  | 102 | . |
| 2715 | 1 | 1/0/1900   | 289 | M | Caucasian | .                  | 100 | 79  | 72  | 87  | 78  | . |
| 2738 | 1 | 1/0/1900   | 291 | M | Caucasian | .                  | 119 | 83  | 100 | 77  | 89  | . |
| 2673 | 1 | 1/0/1900   | 292 | M | Unknown   | .                  | 101 | 64  | 74  | 64  | 79  | . |
| 2766 | 1 | 1/0/1900   | 293 | F | Caucasian | .                  | 105 | 94  | 89  | 88  | 93  | . |
| 2749 | 1 | 1/0/1900   | 295 | F | Other     | .                  | 100 | 109 | 103 | 83  | 77  | . |
| 2756 | 1 | 1/0/1900   | 296 | F | Caucasian | .                  | 112 | 90  | 81  | 93  | 85  | . |
| 2832 | 1 | 9/12/1985  | 297 | M | Unknown   | .                  |     |     |     |     |     | . |
| 2972 | 1 | 1/0/1900   | 298 | F | Caucasian | .                  | 111 | 96  | 95  | 88  | 88  | . |
| 2852 | 1 | 12/18/1986 | 299 | M | Caucasian | .                  | 110 | 98  | 103 | 90  | 84  | . |
| 2753 | 1 | 1/0/1900   | 300 | M | Other     | .                  | 119 | 86  | 86  | 90  | 83  | . |
| 2811 | 1 | 1/0/1900   | 301 | M | Caucasian | .                  | 112 | 91  | 90  | 90  | 85  | . |
| 2837 | 1 | 9/27/1985  | 303 | M | Caucasian | .                  | 129 | 99  | 89  | 90  | 85  | . |
| 2963 | 1 | 4/27/1987  | 305 | M | Caucasian | .                  | 142 | 114 | 108 | 109 | 92  | . |
| 2826 | 1 | 10/28/1989 | 306 | M | Caucasian | .                  | 107 | 88  | 94  | 91  | 89  | . |
| 2810 | 1 | 1/0/1900   | 308 | M | Caucasian | .                  | 105 | 78  | 79  | 77  | 68  | . |
| 2834 | 1 | 6/14/1985  | 309 | F | Caucasian | .                  | 135 | 113 | 96  | 97  | 86  | . |
| 2833 | 1 | 6/13/1987  | 314 | F | Caucasian | .                  | 125 | 91  | 90  | 88  | 85  | . |
| 2863 | 1 | 6/15/1983  | 315 | M | Caucasian | .                  | 110 | 90  | 82  | 77  | 73  | . |
| 2868 | 1 | 1/25/1988  | 316 | F | Caucasian | .                  | 118 | 96  | 91  | 88  | 99  | . |
| 2894 | 1 | 4/17/1989  | 322 | F | Caucasian | .                  | 94  | 79  | 81  | 87  | 78  | . |
| 2917 | 1 | 1/0/1900   | 323 | F | Caucasian | Mouthwash<br>only. | 112 | 99  | 85  | 93  | 100 | . |
| 2907 | 1 | 8/18/1987  | 325 | F | Unknown   | .                  | 107 | 93  | 96  | 96  | 89  | . |
| 3040 | 1 | 1/0/1900   | 327 | F | Unknown   | .                  | 122 | 92  | 94  | 96  | 96  | . |



|      |   |            |     |   |         |                                                     |     |     |     |     |     |   |
|------|---|------------|-----|---|---------|-----------------------------------------------------|-----|-----|-----|-----|-----|---|
| 3526 | 1 | 3/27/1991  | 382 | F | Unknown | .                                                   | 95  | 79  | 79  | 90  | 78  | . |
| 3536 | 1 | 9/25/1990  | 384 | M | Unknown | .                                                   | 106 | 70  | 69  | 70  | 69  | . |
| 3556 | 1 | 6/11/1993  | 385 | M | Unknown | Proband does not qualify. Use family for LLD study. |     |     |     |     |     |   |
| 3583 | 1 | 6/16/1986  | 386 | M | Unknown | .                                                   | 100 | 73  | 69  | 71  | 69  | . |
| 3606 | 1 | 3/6/1987   | 387 | M | Unknown | .                                                   | 100 | 78  | 76  | 76  | 76  | . |
| 3577 | 1 | 5/25/1992  | 389 | M | Unknown | .                                                   | 104 | 97  | 94  | 94  | 94  | . |
| 3633 | 1 | 12/13/1993 | 390 | F | Unknown | .                                                   | 117 | 62  | 70  | 70  | 65  | . |
| 3650 | 1 | 3/19/1988  | 391 | F | Unknown | .                                                   | 98  | 82  | 79  | 82  | .   | . |
| 3656 | 1 | 10/21/1989 | 392 | F | Unknown | .                                                   |     |     |     |     |     |   |
| 3632 | 1 | 4/20/1985  | 393 | M | Unknown | .                                                   | 90  | 81  | 97  | 84  | 75  | . |
| 3655 | 1 | 1/0/1900   | 394 | M | Unknown | .                                                   | 104 | 81  | 68  | 76  | 76  | . |
| 3652 | 1 | 3/19/1988  | 395 | M | Unknown | .                                                   | 95  | 64  | 72  | 68  | 68  | . |
| 3657 | 1 | 3/29/1985  | 396 | M | Unknown | .                                                   | 94  | 92  | 89  | 75  | 66  | . |
| 3653 | 1 | 12/3/1991  | 397 | M | Unknown | .                                                   | 128 | 84  | 87  | 90  | 83  | . |
| 3658 | 1 | 8/17/1989  | 398 | M | Unknown | .                                                   | 98  | 74  | 71  | 78  | 74  | . |
| 3665 | 1 | 1/18/1989  | 399 | M | Unknown | .                                                   | 104 | 81  | 90  | 73  | 66  | . |
| 3748 | 1 | 3/19/1989  | 401 | F | Unknown | .                                                   | 113 | 75  | 69  | 80  | 72  | . |
| 3718 | 1 | 8/2/1993   | 402 | M | Unknown | .                                                   | 115 | 98  | 103 | 90  | 98  | . |
| 3781 | 1 | 5/20/1990  | 403 | F | Unknown | .                                                   | 100 | 90  | 86  | 88  | 82  | . |
| 3779 | 1 | 4/21/1988  | 404 | F | Unknown | .                                                   | 111 | 93  | 95  | 78  | 90  | . |
| 3774 | 1 | 2/3/1989   | 405 | M | Unknown | .                                                   | 119 | 103 | 90  | 77  | 99  | . |
| 3775 | 1 | 1/2/1989   | 406 | M | Unknown | .                                                   | 139 | 108 | 90  | 93  | 80  | . |
| 3802 | 1 | 6/5/1989   | 407 | M | Unknown | .                                                   | 94  | 96  | 103 | 78  | 83  | . |
| 3817 | 1 | 2/23/1989  | 410 | F | Unknown | .                                                   | 141 | 103 | 89  | 100 | 105 | . |
| 3819 | 1 | 2/28/1989  | 412 | M | Unknown | .                                                   | 124 | 99  | 93  | 105 | 110 | . |

**Table S4B. Characteristics of dyslexia cases recruited from Atlanta**

| Sample code | Family ID | Phenotype           | Relationship         | Gender | Age |
|-------------|-----------|---------------------|----------------------|--------|-----|
| GFID_1      | 7         | no                  | Mother               | F      | 44  |
| GFID_101    | 19        | dyslexic            | Proband              | F      | 10  |
| GFID_102    | 19        | no                  | Father               | M      | 48  |
| GFID_103    | 19        | no                  | Mother               | F      | 48  |
| GFID_104    | 19        | difficulty spelling | Sister               | F      | 8   |
| GFID_106    | 5         | no                  | Father               | M      | 45  |
| GFID_107    | 5         | dyslexic            | Mother               | F      | 44  |
| GFID_11     | 13        | ND                  | Maternal Grandmother | F      | 72  |
| GFID_113    | 5         | dyslexic            | Proband              | F      | 11  |
| GFID_114    | 5         | dyslexic            | Brother              | M      | 7   |
| GFID_117    | 23        | dyslexic            | Father               | M      | 48  |
| GFID_118    | 23        | dyslexic            | Brother              | M      | 12  |

---

|          |    |                     |                      |   |    |
|----------|----|---------------------|----------------------|---|----|
| GFID_12  | 13 | difficulty spelling | Maternal Grandfather | M | 74 |
| GFID_120 | 23 | no                  | Brother              | M | 9  |
| GFID_126 | 20 | dyslexic            | Proband              | M | 10 |
| GFID_128 | 20 | no                  | Father               | M | 44 |
| GFID_129 | 20 | no                  | Mother               | F | 43 |
| GFID_131 | 20 | no                  | Sister               | F | 13 |
| GFID_132 | 20 | dyslexic            | Sister               | F | 16 |
| GFID_134 | 28 | dyslexic            | Proband              | M | 8  |
| GFID_135 | 28 | no                  | Father               | M | 53 |
| GFID_136 | 4  | no                  | Mother               | F | 49 |
| GFID_137 | 4  | no                  | Father               | M | 50 |
| GFID_138 | 4  | no                  | Sister               | F | 14 |
| GFID_139 | 4  | dyslexic            | Proband              | F | 11 |
| GFID_140 | 28 | no                  | Brother              | M | 6  |
| GFID_145 | 4  | difficulty spelling | Sister               | F | 18 |
| GFID_147 | 4  | no                  | Brother              | M | 16 |
| GFID_148 | 28 | dyslexic            | Mother               | F | 40 |
| GFID_149 | 28 | no                  | Brother              | M | 3  |
| GFID_15  | 12 | difficulty spelling | Paternal Grandmother | F | 68 |
| GFID_157 | 27 | difficulty spelling | Father               | M | 44 |
| GFID_158 | 27 | dyslexic            | Maternal Grandmother | F | 70 |
| GFID_16  | 12 | no                  | Paternal Grandfather | M | 68 |
| GFID_160 | 17 | no                  | Mother               | F | 43 |
| GFID_161 | 17 | no                  | Sister               | F | 13 |
| GFID_162 | 17 | no                  | Brother              | M | 6  |
| GFID_164 | 17 | dyslexic            | Brother              | M | 8  |
| GFID_17  | 26 | no                  | Paternal Grandfather | M | 76 |
| GFID_170 | 27 | dyslexic            | Mother               | F | 47 |
| GFID_171 | 27 | no                  | Paternal Grandmother | F | 79 |
| GFID_172 | 27 | no                  | Paternal Grandfather | M | 79 |
| GFID_187 | 26 | dyslexic            | Aunt                 | F | 53 |
| GFID_194 | 26 | no                  | Mother               | F | 41 |
| GFID_195 | 26 | dyslexic            | Proband              | M | 9  |
| GFID_2   | 7  | no                  | Brother              | M | 10 |
| GFID_20  | 7  | no                  | Paternal Grandfather | M | 71 |
| GFID_203 | 1  | dyslexic            | Proband              | F | 10 |
| GFID_204 | 1  | no                  | Mother               | F | 43 |
| GFID_209 | 16 | no                  | Sister               | F | 10 |
| GFID_21  | 6  | ND                  | Paternal Grandmother | F | 74 |
| GFID_210 | 16 | no                  | Father               | M | 50 |
| GFID_211 | 29 | no                  | Father               | M | 44 |
| GFID_212 | 29 | dyslexic            | Proband              | M | 11 |
| GFID_221 | 24 | no                  | Brother              | M | 11 |
| GFID_224 | 24 | dyslexic            | Proband              | M | 9  |
| GFID_230 | 29 | no                  | Mother               | F | 40 |
| GFID_238 | 9  | dyslexic            | Proband              | M | 11 |
| GFID_241 | 9  | no                  | Father               | M | 42 |
| GFID_242 | 9  | no                  | Mother               | F | 40 |
| GFID_243 | 9  | no                  | Maternal Grandmother | F | 61 |
| GFID_244 | 9  | no                  | Sister               | F | 7  |

---

|          |    |          |                      |    |    |
|----------|----|----------|----------------------|----|----|
| GFID_245 | 6  | no       | Mother               | F  | 43 |
| GFID_248 | 6  | no       | Father               | M  | 41 |
| GFID_25  | 26 | no       | Paternal Grandmother | F  | 68 |
| GFID_300 | ND | dyslexic | Proband              | ND | ND |
| GFID_301 | ND | dyslexic | proband              | ND | ND |
| GFID_302 | ND | dyslexic | proband              | ND | ND |
| GFID_303 | ND | dyslexic | proband              | ND | ND |
| GFID_304 | ND | dyslexic | proband              | ND | ND |
| GFID_305 | ND | dyslexic | proband              | ND | ND |
| GFID_306 | ND | dyslexic | proband              | ND | ND |
| GFID_307 | ND | dyslexic | proband              | ND | ND |
| GFID_308 | ND | dyslexic | proband              | ND | ND |
| GFID_309 | ND | dyslexic | proband              | ND | ND |
| GFID_310 | ND | dyslexic | proband              | ND | ND |
| GFID_311 | ND | dyslexic | proband              | ND | ND |
| GFID_312 | ND | dyslexic | proband              | ND | ND |
| GFID_313 | ND | dyslexic | proband              | ND | ND |
| GFID_314 | ND | dyslexic | proband              | ND | ND |
| GFID_315 | ND | dyslexic | proband              | ND | ND |
| GFID_316 | ND | dyslexic | proband              | ND | ND |
| GFID_317 | ND | dyslexic | proband              | ND | ND |
| GFID_318 | ND | dyslexic | proband              | ND | ND |
| GFID_319 | ND | dyslexic | proband              | ND | ND |
| GFID_320 | ND | dyslexic | proband              | ND | ND |
| GFID_321 | ND | dyslexic | proband              | ND | ND |
| GFID_322 | ND | dyslexic | proband              | ND | ND |
| GFID_323 | ND | dyslexic | proband              | ND | ND |
| GFID_324 | ND | dyslexic | proband              | ND | ND |
| GFID_325 | ND | dyslexic | proband              | ND | ND |
| GFID_329 | ND | dyslexic | proband              | ND | ND |
| GFID_330 | ND | dyslexic | proband              | ND | ND |
| GFID_334 | ND | dyslexic | proband              | ND | ND |
| GFID_335 | ND | dyslexic | proband              | ND | ND |
| GFID_336 | ND | dyslexic | proband              | ND | ND |
| GFID_337 | ND | dyslexic | proband              | ND | ND |
| GFID_34  | 29 | no       | Grandmother          | F  | 75 |
| GFID_340 | ND | dyslexic | proband              | ND | ND |
| GFID_341 | ND | dyslexic | proband              | ND | ND |
| GFID_342 | ND | dyslexic | proband              | ND | ND |
| GFID_343 | ND | dyslexic | proband              | ND | ND |
| GFID_344 | ND | dyslexic | proband              | ND | ND |
| GFID_345 | ND | dyslexic | proband              | ND | ND |
| GFID_346 | ND | dyslexic | proband              | ND | ND |
| GFID_347 | ND | dyslexic | proband              | ND | ND |
| GFID_348 | ND | dyslexic | proband              | ND | ND |
| GFID_349 | ND | dyslexic | proband              | ND | ND |
| GFID_35  | 29 | no       | Grandfather          | M  | 77 |
| GFID_350 | ND | dyslexic | proband              | ND | ND |
| GFID_351 | ND | dyslexic | proband              | ND | ND |
| GFID_352 | ND | dyslexic | proband              | ND | ND |

|          |    |          |                      |    |    |
|----------|----|----------|----------------------|----|----|
| GFID_353 | ND | dyslexic | proband              | ND | ND |
| GFID_354 | ND | dyslexic | proband              | ND | ND |
| GFID_355 | ND | dyslexic | proband              | ND | ND |
| GFID_356 | ND | dyslexic | proband              | ND | ND |
| GFID_357 | ND | dyslexic | proband              | ND | ND |
| GFID_358 | ND | dyslexic | proband              | ND | ND |
| GFID_359 | ND | dyslexic | proband              | ND | ND |
| GFID_36  | 18 | no       | Maternal Grandmother | F  | 74 |
| GFID_360 | ND | dyslexic | proband              | ND | ND |
| GFID_361 | ND | dyslexic | proband              | ND | ND |
| GFID_362 | ND | dyslexic | proband              | ND | ND |
| GFID_363 | ND | dyslexic | proband              | ND | ND |
| GFID_364 | ND | dyslexic | proband              | ND | ND |
| GFID_365 | ND | dyslexic | proband              | ND | ND |
| GFID_366 | ND | dyslexic | proband              | ND | ND |
| GFID_367 | ND | dyslexic | proband              | ND | ND |
| GFID_368 | ND | dyslexic | proband              | ND | ND |
| GFID_369 | ND | dyslexic | proband              | ND | ND |
| GFID_37  | 18 | no       | Sister               | F  | 18 |
| GFID_370 | ND | dyslexic | proband              | ND | ND |
| GFID_371 | ND | dyslexic | proband              | ND | ND |
| GFID_372 | ND | dyslexic | proband              | ND | ND |
| GFID_373 | ND | dyslexic | proband              | ND | ND |
| GFID_374 | ND | dyslexic | proband              | ND | ND |
| GFID_375 | ND | dyslexic | proband              | ND | ND |
| GFID_376 | ND | dyslexic | proband              | ND | ND |
| GFID_377 | ND | dyslexic | proband              | ND | ND |
| GFID_378 | ND | dyslexic | proband              | ND | ND |
| GFID_379 | ND | dyslexic | proband              | ND | ND |
| GFID_38  | 25 | no       | Maternal Grandfather | M  | 69 |
| GFID_380 | ND | dyslexic | proband              | ND | ND |
| GFID_381 | ND | dyslexic | proband              | ND | ND |
| GFID_382 | ND | dyslexic | proband              | ND | ND |
| GFID_383 | ND | dyslexic | proband              | ND | ND |
| GFID_384 | ND | dyslexic | proband              | ND | ND |
| GFID_385 | ND | dyslexic | proband              | ND | ND |
| GFID_386 | ND | dyslexic | proband              | ND | ND |
| GFID_387 | ND | dyslexic | proband              | ND | ND |
| GFID_388 | ND | dyslexic | proband              | ND | ND |
| GFID_389 | ND | dyslexic | proband              | ND | ND |
| GFID_39  | 25 | no       | Maternal Grandmother | F  | 67 |
| GFID_390 | ND | dyslexic | proband              | ND | ND |
| GFID_392 | ND | dyslexic | proband              | ND | ND |
| GFID_393 | ND | dyslexic | proband              | ND | ND |
| GFID_394 | ND | dyslexic | proband              | ND | ND |
| GFID_395 | ND | dyslexic | proband              | ND | ND |
| GFID_396 | ND | dyslexic | proband              | ND | ND |
| GFID_397 | ND | dyslexic | proband              | ND | ND |
| GFID_398 | ND | dyslexic | proband              | ND | ND |
| GFID_399 | ND | dyslexic | proband              | ND | ND |

|          |    |          |                      |    |    |
|----------|----|----------|----------------------|----|----|
| GFID_4   | 7  | dyslexic | Father               | M  | 44 |
| GFID_40  | 1  | no       | Maternal Grandmother | F  | 73 |
| GFID_400 | ND | dyslexic | proband              | ND | ND |
| GFID_401 | ND | dyslexic | proband              | ND | ND |
| GFID_402 | ND | dyslexic | proband              | ND | ND |
| GFID_403 | ND | dyslexic | proband              | ND | ND |
| GFID_404 | ND | dyslexic | proband              | ND | ND |
| GFID_405 | ND | dyslexic | proband              | ND | ND |
| GFID_406 | ND | dyslexic | proband              | ND | ND |
| GFID_407 | ND | dyslexic | proband              | ND | ND |
| GFID_408 | ND | dyslexic | proband              | ND | ND |
| GFID_409 | ND | dyslexic | proband              | ND | ND |
| GFID_41  | 1  | no       | Maternal Grandfather | M  | 83 |
| GFID_410 | ND | dyslexic | proband              | ND | ND |
| GFID_411 | ND | dyslexic | proband              | ND | ND |
| GFID_412 | ND | dyslexic | proband              | ND | ND |
| GFID_413 | ND | dyslexic | proband              | ND | ND |
| GFID_414 | ND | dyslexic | proband              | ND | ND |
| GFID_415 | ND | dyslexic | proband              | ND | ND |
| GFID_416 | ND | dyslexic | proband              | ND | ND |
| GFID_417 | ND | dyslexic | proband              | ND | ND |
| GFID_418 | ND | dyslexic | proband              | ND | ND |
| GFID_419 | ND | dyslexic | proband              | ND | ND |
| GFID_42  | 16 | no       | Maternal Grandmother | F  | 64 |
| GFID_420 | ND | dyslexic | proband              | ND | ND |
| GFID_421 | ND | dyslexic | proband              | ND | ND |
| GFID_422 | ND | dyslexic | proband              | ND | ND |
| GFID_423 | ND | dyslexic | proband              | ND | ND |
| GFID_424 | ND | dyslexic | proband              | ND | ND |
| GFID_425 | ND | dyslexic | proband              | ND | ND |
| GFID_426 | ND | dyslexic | proband              | ND | ND |
| GFID_427 | ND | dyslexic | proband              | ND | ND |
| GFID_428 | ND | dyslexic | proband              | ND | ND |
| GFID_429 | ND | dyslexic | proband              | ND | ND |
| GFID_43  | 16 | no       | Maternal Grandfather | M  | 66 |
| GFID_430 | ND | dyslexic | proband              | ND | ND |
| GFID_431 | ND | dyslexic | proband              | ND | ND |
| GFID_432 | ND | dyslexic | proband              | ND | ND |
| GFID_433 | ND | dyslexic | proband              | ND | ND |
| GFID_434 | ND | dyslexic | proband              | ND | ND |
| GFID_435 | ND | dyslexic | proband              | ND | ND |
| GFID_436 | ND | dyslexic | proband              | ND | ND |
| GFID_437 | ND | dyslexic | proband              | ND | ND |
| GFID_438 | ND | dyslexic | proband              | ND | ND |
| GFID_439 | ND | dyslexic | proband              | ND | ND |
| GFID_44  | 22 | no       | Paternal Grandfather | M  | 71 |
| GFID_440 | ND | dyslexic | proband              | ND | ND |
| GFID_441 | ND | dyslexic | proband              | ND | ND |
| GFID_442 | ND | dyslexic | proband              | ND | ND |
| GFID_443 | ND | dyslexic | proband              | ND | ND |

|                              |     |          |                      |    |    |
|------------------------------|-----|----------|----------------------|----|----|
| GFID_444                     | ND  | dyslexic | proband              | ND | ND |
| GFID_445                     | ND  | dyslexic | proband              | ND | ND |
| GFID_446                     | ND  | dyslexic | proband              | ND | ND |
| GFID_447                     | ND  | dyslexic | proband              | ND | ND |
| GFID_448                     | ND  | dyslexic | proband              | ND | ND |
| GFID_449                     | ND  | dyslexic | proband              | ND | ND |
| GFID_45                      | 22  | no       | Paternal Grandmother | F  | 66 |
| GFID_450                     | ND  | dyslexic | proband              | ND | ND |
| GFID_451                     | ND  | dyslexic | proband              | ND | ND |
| GFID_452                     | ND  | dyslexic | proband              | ND | ND |
| GFID_453                     | ND  | dyslexic | proband              | ND | ND |
| GFID_454                     | ND  | dyslexic | proband              | ND | ND |
| GFID_455                     | ND  | dyslexic | proband              | ND | ND |
| GFID_456                     | ND  | dyslexic | proband              | ND | ND |
| GFID_457                     | ND  | dyslexic | proband              | ND | ND |
| GFID_458                     | ND  | dyslexic | proband              | ND | ND |
| GFID_459                     | ND  | dyslexic | proband              | ND | ND |
| GFID_460                     | ND  | dyslexic | proband              | ND | ND |
| GFID_461                     | ND  | dyslexic | proband              | ND | ND |
| GFID_462                     | ND  | dyslexic | proband              | ND | ND |
| GFID_463                     | ND  | dyslexic | proband              | ND | ND |
| GFID_464                     | ND  | dyslexic | proband              | ND | ND |
| GFID_465                     | ND  | dyslexic | proband              | ND | ND |
| GFID_466                     | ND  | dyslexic | proband              | ND | ND |
| GFID_467                     | ND  | dyslexic | proband              | ND | ND |
| GFID_468                     | ND  | dyslexic | proband              | ND | ND |
| GFID_469                     | ND  | dyslexic | proband              | ND | ND |
| GFID_470                     | ND  | dyslexic | proband              | ND | ND |
| GFID_471                     | ND  | dyslexic | proband              | ND | ND |
| GFID_472                     | ND  | dyslexic | proband              | ND | ND |
| GFID_473                     | ND  | dyslexic | proband              | ND | ND |
| GFID_474                     | ND  | dyslexic | proband              | ND | ND |
| GFID_5                       | 3   | ND       | Maternal Grandfather | M  | 71 |
| GFID_68                      | 15  | dyslexic | Proband              | M  | 9  |
| GFID_69                      | 15  | no       | Mother               | F  | 41 |
| GFID_7                       | 2   | no       | Maternal Grandmother | F  | 60 |
| GFID_70                      | 15  | no       | Sister               | F  | 11 |
| GFID_71                      | 15  | no       | Father               | M  | 39 |
| GFID_92                      | 21  | ND       | Brother              | M  | 9  |
| GFID_93                      | 21  | ND       | Sister               | F  | 5  |
| GFID_95                      | 21  | dyslexic | Proband              | F  | 11 |
| GFID_96                      | 21  | no       | Mother               | F  | 42 |
| Dyslexic                     | 189 |          |                      |    |    |
| relative not dyslexic        | 38  |          |                      |    |    |
| relative difficulty spelling | 5   |          |                      |    |    |
| relative don't know          | 2   |          |                      |    |    |
| Total samples                | 234 |          |                      |    |    |
