# Supplementary material for: Relative Burden of Large CNVs on a Range of Neurodevelopmental Phenotypes
Source: PubMed Central journal article supplement (PMC3213131; doi:10.1371/journal.pgen.1002334), 2011-11-10
Supplement: pgen.1002334.s012.pdf [file pgen.1002334.s012.pdf]

**Table S5. Clinical details of cases with autism (both with and without ID)**

| <b>Sample ID</b> | <b>ID group</b> | <b>Sex</b> | <b>Age (years)</b> | <b>Age (m)</b> | <b>Ethnicity</b> | <b>ADOS score</b> | <b>Verbal IQ score</b> | <b>Non-verbal IQ score</b> | <b>Full scale IQ</b> | <b>Vineland composite score</b> |
|------------------|-----------------|------------|--------------------|----------------|------------------|-------------------|------------------------|----------------------------|----------------------|---------------------------------|
| Si31             | profound        | male       | 18                 | 10             | Caucasian        | 9                 | 19                     | 19                         | 18                   | 56                              |
| Si341            | profound        | female     | 17                 | 7              | Caucasian        | 7                 | 18                     | 26                         | 23                   | 45                              |
| Si86             | severe          | female     | 17                 | 12             |                  | 10                | 19                     | 29                         | 26                   | 53                              |
| Si176            | severe          | male       | 14                 | 10             |                  | 9                 | 20                     | 29                         | 26                   | 52                              |
| Si98             | severe          | male       | 14                 | 13             | Caucasian        | 7                 | 19                     | 32                         | 28                   | 50                              |
| Si159            | severe          | female     | 14                 | 17             |                  | 6                 | 21                     | 31                         | 28                   | 55                              |
| Si151            | severe          | female     | 8                  | 8              | Caucasian        | 7                 | 18                     | 42                         | 30                   | 50                              |
| Si260            | severe          | female     | 14                 | 8              | Hispanic         | 10                | 21                     | 34                         | 30                   | 43                              |
| Si312            | severe          | female     | 16                 | 8              | Caucasian        | 10                | 31                     | 30                         | 30                   | 63                              |
| Si344            | severe          | male       | 15                 | 10             | Caucasian        | 6                 | 28                     | 33                         | 31                   | 52                              |
| Si305            | severe          | male       | 7                  | 12             |                  | 8                 | 22                     | 40                         | 31                   | 70                              |
| Si62             | severe          | male       | 10                 | 14             | Caucasian        | 8                 | 15                     | 49                         | 32                   | 60                              |
| Si242            | severe          | male       | 15                 | 11             |                  | 7                 | 26                     | 35                         | 32                   | 57                              |
| Si254            | severe          | female     | 12                 | 17             | Caucasian        | 6                 | 27                     | 34                         | 32                   | 54                              |
| Si164            | severe          | male       | 8                  | 11             | Asian            | 9                 | 22                     | 43                         | 33                   | 59                              |
| Si306            | severe          | male       | 14                 | 14             | Caucasian        | 6                 | 26                     | 36                         | 33                   | 59                              |
| Si4              | severe          | male       | 13                 | 12             | Caucasian        | 6                 | 24                     | 39                         | 34                   | 54                              |
| Si197            | severe          | male       | 15                 | 13             | Caucasian        | 9                 | 35                     | 34                         | 34                   | 57                              |
| Si253            | severe          | male       | 12                 | 13             |                  | 6                 | 30                     | 36                         | 34                   | 64                              |
| Si282            | severe          | male       | 10                 | 9              | Caucasian        | 6                 | 24                     | 41                         | 35                   | 63                              |
| Si273            | severe          | male       | 14                 | 17             | Caucasian        | 7                 | 26                     | 39                         | 35                   | 54                              |
| Si91             | severe          | female     | 11                 | 11             | Caucasian        | 8                 | 36                     | 36                         | 36                   | 64                              |
| Si264            | severe          | male       | 8                  | 14             |                  | 7                 | 32                     | 40                         | 36                   | 51                              |
| Si48             | severe          | male       | 11                 | 12             | Caucasian        | 10                | 30                     | 45                         | 37                   | 57                              |
| Si222            | severe          | female     | 16                 | 12             |                  | 10                | 19                     | 46                         | 37                   | 45                              |
| Si14             | severe          | male       | 8                  | 14             |                  | 5                 | 31                     | 44                         | 38                   | 60                              |
| Si101            | severe          | male       | 7                  | 11             |                  | 7                 | 30                     | 48                         | 39                   | 66                              |
| Si195            | severe          | male       | 12                 | 9              |                  | 10                | 26                     | 45                         | 39                   | 58                              |
| Si64             | severe          | female     | 10                 | 6              |                  | 6                 | 47                     | 41                         | 40                   | 70                              |
| Si115            | severe          | female     | 12                 | 13             | Asian            | 7                 | 31                     | 45                         | 40                   | 61                              |
| Si166            | severe          | female     | 11                 | 17             | Caucasian        | 8                 | 30                     | 45                         | 40                   | 67                              |
| Si83             | moderate        | male       | 12                 | 12             | Caucasian        | 10                | 40                     | 41                         | 41                   | 64                              |
| Si204            | moderate        | male       | 9                  | 12             |                  | 7                 | 43                     | 44                         | 42                   | 67                              |
| Si225            | moderate        | female     | 11                 | 7              | Caucasian        | 8                 | 30                     | 49                         | 42                   | 69                              |
| Si89             | moderate        | male       | 17                 | 15             | Asian            | 10                | 32                     | 62                         | 43                   | 60                              |
| Si100            | moderate        | male       | 17                 | 13             | Caucasian        | 7                 | 33                     | 63                         | 43                   | 83                              |
| Si329            | moderate        | male       | 15                 | 13             | Caucasian        | 8                 | 27                     | 59                         | 43                   | 66                              |
| Si163            | moderate        | male       | 8                  | 15             | Caucasian        | 7                 | 47                     | 49                         | 46                   | 63                              |
| Si227            | moderate        | male       | 7                  | 17             |                  | 8                 | 38                     | 57                         | 46                   | 63                              |

|       |          |        |    |    |                  |    |    |    |    |    |
|-------|----------|--------|----|----|------------------|----|----|----|----|----|
| Si53  | moderate | male   | 12 | 9  | Caucasian        | 10 | 40 | 50 | 47 | 65 |
| Si162 | moderate | male   | 7  | 11 |                  | 7  | 38 | 56 | 47 | 64 |
| Si250 | moderate | male   | 15 | 15 | African-American | 6  | 60 | 39 | 47 | 66 |
| Si301 | moderate | male   | 6  | 12 |                  | 6  | 32 | 49 | 47 | 59 |
| Si133 | moderate | female | 12 | 6  | African-American | 9  | 39 | 59 | 48 | 67 |
| Si145 | moderate | male   | 15 | 13 | Caucasian        | 9  | 37 | 68 | 48 | 70 |
| Si323 | moderate | male   | 15 | 6  |                  | 10 | 36 | 61 | 48 | 56 |
| Si139 | moderate | male   | 12 | 13 |                  | 8  | 62 | 44 | 50 | 69 |
| Si324 | moderate | female | 16 | 11 | African-American | 10 | 28 | 72 | 51 | 59 |
| Si39  | moderate | female | 11 | 12 | Caucasian        | 10 | 46 | 62 | 52 | 63 |
| Si266 | moderate | male   | 13 | 9  | Caucasian        | 7  | 37 | 59 | 52 | 55 |
| Si66  | moderate | male   | 9  | 10 | Caucasian        | 7  | 50 | 59 | 53 | 64 |
| Si147 | moderate | male   | 11 | 10 |                  | 6  | 47 | 60 | 53 | 67 |
| Si272 | moderate | male   | 13 | 12 |                  | 10 | 34 | 71 | 53 | 64 |
| Si335 | moderate | female | 14 | 16 |                  | 8  | 47 | 66 | 53 | 61 |
| Si200 | moderate | male   | 10 | 8  | Caucasian        | 8  | 44 | 63 | 53 | 91 |
| Si201 | moderate | male   | 8  | 10 | Caucasian        | 10 | 47 | 61 | 53 | 64 |
| Si156 | moderate | female | 10 | 12 |                  | 5  | 62 | 55 | 54 | 67 |
| Si321 | moderate | male   | 8  | 9  | Caucasian        | 10 | 60 | 59 | 54 | 67 |
| Si34  | moderate | male   | 10 | 6  |                  | 10 | 63 | 55 | 55 | 74 |
| Si137 | moderate | male   | 13 | 6  | African-American | 10 | 39 | 71 | 55 | 74 |
| Si277 | moderate | male   | 14 | 16 |                  | 6  | 30 | 76 | 55 | 61 |
| Si96  | mild     | male   | 15 | 13 | Hispanic         | 9  | 58 | 55 | 56 | 58 |
| Si84  | mild     | male   | 14 | 7  | Caucasian        | 8  | 53 | 67 | 56 | 77 |
| Si298 | mild     | male   | 18 | 12 | Caucasian        | 8  | 23 | 82 | 56 | 48 |
| Si287 | mild     | male   | 9  | 8  |                  | 8  | 40 | 74 | 57 | 72 |
| Si309 | mild     | male   | 8  | 15 | Caucasian        | 9  | 51 | 65 | 57 | 65 |
| Si169 | mild     | female | 9  | 10 | Caucasian        | 10 | 65 | 60 | 57 | 57 |
| Si347 | mild     | female | 8  | 7  |                  | 7  | 75 | 55 | 58 | 72 |
| Si241 | mild     | male   | 13 | 9  |                  | 8  | 67 | 56 | 59 | 61 |
| Si229 | mild     | female | 11 | 16 | Caucasian        | 9  | 45 | 67 | 59 | 69 |
| Si245 | mild     | male   | 10 | 16 |                  | 6  | 55 | 67 | 59 | 72 |
| Si74  | mild     | male   | 13 | 8  |                  | 9  | 51 | 66 | 60 | 60 |
| Si81  | mild     | male   | 7  | 7  | Caucasian        | 8  | 38 | 73 | 61 | 70 |
| Si129 | mild     | male   | 6  | 7  | Asian            | 9  | 58 | 64 | 61 | 77 |
| Si333 | mild     | male   | 13 | 13 |                  | 7  | 51 | 67 | 61 | 65 |
| Si11  | mild     | female | 10 | 6  |                  | 7  | 67 | 65 | 62 | 77 |
| Si178 | mild     | male   | 7  | 16 | Caucasian        | 9  | 64 | 67 | 62 | 70 |
| Si230 | mild     | male   | 18 | 17 |                  |    | 70 | 60 | 63 | 75 |
| Si303 | mild     | male   | 11 | 17 | Caucasian        | 10 | 56 | 68 | 63 | 76 |

|       |       |        |    |    |                  |    |    |    |    |    |
|-------|-------|--------|----|----|------------------|----|----|----|----|----|
| Si310 | mild  | male   | 10 | 9  | Caucasian        | 9  | 61 | 70 | 63 | 66 |
| Si41  | mild  | female | 10 | 15 | Caucasian        | 10 | 83 | 54 | 64 | 70 |
| Si134 | mild  | male   | 10 | 7  |                  | 6  | 49 | 79 | 64 | 71 |
| Si171 | mild  | female | 17 | 9  |                  | 10 | 63 | 66 | 64 | 67 |
| Si251 | mild  | male   | 16 | 12 |                  | 10 | 31 | 89 | 64 | 59 |
| Si109 | mild  | male   | 8  | 8  | Caucasian        | 6  | 79 | 64 | 65 | 62 |
| Si138 | mild  | male   | 9  | 10 | Hispanic         | 9  | 59 | 74 | 65 | 69 |
| Si325 | mild  | male   | 9  | 10 | Caucasian        | 8  | 58 | 75 | 66 | 77 |
| Si36  | mild  | male   | 9  | 8  |                  | 6  | 40 | 87 | 67 | 66 |
| Si130 | mild  | male   | 11 | 9  |                  | 6  | 54 | 74 | 67 | 68 |
| Si118 | mild  | male   | 11 | 15 | African-American | 8  | 56 | 76 | 68 | 63 |
| Si238 | mild  | male   | 10 | 13 |                  | 8  | 63 | 76 | 68 | 71 |
| Si285 | mild  | male   | 12 | 8  | Caucasian        | 9  | 57 | 77 | 68 | 87 |
| Si340 | mild  | male   | 11 | 6  | Caucasian        | 10 | 51 | 85 | 68 | 73 |
| Si297 | mild  | male   | 7  | 13 | Caucasian        | 8  | 79 | 62 | 69 | 74 |
| Si261 | mild  | male   | 11 | 9  |                  | 8  | 67 | 73 | 69 | 80 |
| Si311 | mild  | male   | 7  | 13 |                  | 8  | 59 | 59 | 69 | 67 |
| Si6   | mild  | male   | 7  | 12 | Asian            | 8  | 62 | 79 | 70 | 79 |
| Si203 | no MR | male   | 7  | 9  | Asian            | 7  | 73 | 75 | 71 | 79 |
| Si52  | no MR | male   | 7  | 14 | Caucasian        | 9  | 76 | 75 | 72 | 74 |
| Si76  | no MR | male   | 12 | 7  |                  | 10 | 65 | 79 | 72 | 90 |
| Si120 | no MR | female | 7  | 6  | Caucasian        | 10 | 76 | 75 | 72 | 63 |
| Si106 | no MR | male   | 17 | 10 |                  | 9  | 52 | 88 | 73 | 74 |
| Si123 | no MR | male   | 11 | 15 | Caucasian        | 7  | 87 | 68 | 73 | 74 |
| Si47  | no MR | male   | 7  | 13 |                  | 7  | 56 | 89 | 74 | 69 |
| Si258 | no MR | male   | 12 | 10 |                  | 6  | 80 | 74 | 74 | 69 |
| Si173 | no MR | male   | 10 | 14 | Caucasian        | 7  | 67 | 82 | 74 | 75 |
| Si131 | no MR | male   | 10 | 7  | Caucasian        | 10 | 82 | 74 | 75 | 72 |
| Si140 | no MR | male   | 12 | 13 | Caucasian        | 10 | 84 | 71 | 75 | 64 |
| Si161 | no MR | female | 17 | 14 |                  | 6  | 80 | 74 | 75 | 61 |
| Si257 | no MR | male   | 17 | 8  |                  | 7  | 48 | 94 | 75 | 63 |
| Si302 | no MR | male   | 16 | 12 | Caucasian        | 9  | 71 | 82 | 75 | 47 |
| Si44  | no MR | male   | 19 | 17 | Hispanic         |    | 93 | 67 | 76 | 76 |
| Si247 | no MR | male   | 13 | 6  |                  | 6  | 46 | 93 | 76 | 57 |
| Si304 | no MR | male   | 12 | 13 | Hispanic         | 7  | 48 | 94 | 76 | 68 |
| Si7   | no MR | male   | 17 | 15 |                  |    | 88 | 73 | 77 | 67 |
| Si40  | no MR | male   | 16 | 11 |                  | 7  | 82 | 77 | 77 | 78 |
| Si141 | no MR | female | 10 | 15 |                  | 6  | 77 | 80 | 77 | 85 |
| Si232 | no MR | male   | 7  | 16 | Caucasian        | 8  | 88 | 71 | 77 | 72 |
| Si243 | no MR | male   | 12 | 8  |                  | 10 | 83 | 96 | 77 | 68 |
| Si286 | no MR | male   | 12 | 11 |                  | 8  | 48 | 91 | 77 | 73 |
| Si28  | no MR | male   | 11 | 10 | Caucasian        | 7  | 69 | 87 | 78 | 69 |

|       |       |        |    |    |           |    |     |     |    |    |
|-------|-------|--------|----|----|-----------|----|-----|-----|----|----|
| Si182 | no MR | male   | 9  | 11 | Caucasian | 8  | 60  | 92  | 78 | 62 |
| Si224 | no MR | male   | 11 | 7  | Caucasian | 10 | 69  | 88  | 78 | 77 |
| Si274 | no MR | male   | 10 | 12 |           | 4  | 75  | 83  | 78 | 88 |
| Si190 | no MR | male   | 9  | 6  | Caucasian | 7  | 96  | 72  | 78 | 75 |
| Si50  | no MR | male   | 13 | 12 |           | 10 | 78  | 81  | 79 | 60 |
| Si65  | no MR | male   | 11 | 10 |           | 7  | 96  | 74  | 79 | 81 |
| Si117 | no MR | male   | 10 | 16 | Caucasian | 9  | 86  | 78  | 79 | 81 |
| Si186 | no MR | male   | 11 | 13 | Hispanic  | 5  | 86  | 78  | 79 | 76 |
| Si192 | no MR | male   | 7  | 16 |           | 6  | 60  | 94  | 79 | 85 |
| Si216 | no MR | male   | 11 | 13 |           | 8  | 83  | 80  | 79 | 73 |
| Si21  | no MR | female | 9  | 16 | Asian     | 10 | 77  | 85  | 80 | 76 |
| Si126 | no MR | male   | 6  | 9  | Caucasian | 6  | 78  | 85  | 80 | 65 |
| Si177 | no MR | male   | 10 | 8  | Caucasian | 8  | 96  | 75  | 80 | 80 |
| Si271 | no MR | male   | 12 | 8  | Caucasian | 10 | 63  | 93  | 80 | 69 |
| Si319 | no MR | male   | 12 | 6  |           | 8  | 93  | 92  | 80 | 73 |
| Si78  | no MR | male   | 17 | 9  | Caucasian | 6  | 77  | 89  | 81 | 78 |
| Si342 | no MR | male   | 6  | 9  |           | 5  | 75  | 89  | 81 | 84 |
| Si343 | no MR | male   | 11 | 8  |           | 8  | 72  | 89  | 81 | 77 |
| Si205 | no MR | male   | 8  | 12 | Caucasian | 8  | 75  | 99  | 81 | 77 |
| Si13  | no MR | male   | 11 | 6  |           | 6  | 78  | 87  | 82 | 73 |
| Si24  | no MR | female | 14 | 14 | Caucasian | 10 | 102 | 74  | 82 | 87 |
| Si113 | no MR | female | 8  | 8  | Caucasian | 6  | 81  | 84  | 82 | 94 |
| Si280 | no MR | male   | 15 | 12 | Caucasian | 6  | 84  | 83  | 82 | 67 |
| Si5   | no MR | male   | 8  | 13 | Caucasian | 8  | 92  | 81  | 83 | 63 |
| Si79  | no MR | male   | 16 | 13 |           | 8  | 77  | 83  | 83 | 68 |
| Si127 | no MR | male   | 7  | 11 |           | 8  | 77  | 90  | 83 | 75 |
| Si318 | no MR | male   | 12 | 11 |           | 7  | 89  | 80  | 83 | 68 |
| Si2   | no MR | female | 11 | 7  |           | 8  | 95  | 81  | 84 | 79 |
| Si181 | no MR | male   | 11 | 7  | Caucasian | 10 | 75  | 92  | 84 | 70 |
| Si221 | no MR | male   | 10 | 16 | Caucasian | 6  | 76  | 91  | 84 | 92 |
| Si269 | no MR | male   | 8  | 13 |           | 7  | 89  | 85  | 84 | 70 |
| Si9   | no MR | male   | 9  | 12 |           | 4  | 64  | 100 | 85 | 78 |
| Si25  | no MR | male   | 13 | 9  |           | 7  | 90  | 84  | 85 | 61 |
| Si68  | no MR | male   | 16 | 14 |           | 6  | 80  | 90  | 85 | 82 |
| Si152 | no MR | male   | 12 | 17 | u         | 9  | 80  | 94  | 85 | 69 |
| Si281 | no MR | male   | 10 | 16 | Asian     | 6  | 89  | 84  | 85 | 69 |
| Si345 | no MR | male   | 13 | 8  |           | 9  | 86  | 87  | 85 | 73 |
| Si210 | no MR | male   | 16 | 10 | Caucasian | 8  | 95  | 87  | 85 | 69 |
| Si217 | no MR | male   | 10 | 7  | Caucasian | 7  | 82  | 90  | 85 | 86 |
| Si288 | no MR | male   | 12 | 6  | u         | 9  | 93  | 83  | 85 | 82 |
| Si346 | no MR | male   | 9  | 7  |           | 10 | 77  | 92  | 85 | 78 |
| Si56  | no MR | male   | 15 | 11 | Caucasian | 7  | 106 | 77  | 86 | 64 |
| Si111 | no MR | male   | 8  | 12 |           | 9  | 75  | 97  | 86 | 88 |

|       |       |        |    |    |                      |    |     |     |    |     |
|-------|-------|--------|----|----|----------------------|----|-----|-----|----|-----|
| Si136 | no MR | male   | 8  | 8  |                      | 6  | 75  | 95  | 86 | 77  |
| Si146 | no MR | male   | 18 | 10 | African-<br>American | 8  | 73  | 95  | 86 | 74  |
| Si214 | no MR | male   | 8  | 11 | Caucasian            | 8  | 99  | 82  | 86 | 81  |
| Si75  | no MR | male   | 10 | 6  | Caucasian            | 5  | 84  | 90  | 87 | 81  |
| Si187 | no MR | male   | 9  | 16 | Caucasian            | 8  | 74  | 105 | 87 | 76  |
| Si326 | no MR | male   | 11 | 6  |                      | 9  | 96  | 85  | 87 | 93  |
| Si3   | no MR | male   | 8  | 15 |                      | 10 | 80  | 96  | 88 | 110 |
| Si55  | no MR | male   | 18 | 9  |                      | 8  | 86  | 92  | 88 | 64  |
| Si348 | no MR | male   | 17 | 13 | Caucasian            | 10 | 50  | 104 | 88 | 67  |
| Si212 | no MR | male   | 8  | 9  |                      | 10 | 81  | 96  | 88 | 72  |
| Si276 | no MR | male   | 10 | 7  | Caucasian            | 8  | 79  | 98  | 88 | 79  |
| Si158 | no MR | male   | 11 | 15 |                      | 10 | 83  | 94  | 89 | 72  |
| Si289 | no MR | male   | 9  | 11 | ai                   | 7  | 88  | 91  | 89 | 84  |
| Si185 | no MR | male   | 11 | 15 |                      | 6  | 89  | 90  | 89 | 78  |
| Si220 | no MR | male   | 8  | 14 | Caucasian            | 8  | 95  | 89  | 89 | 74  |
| Si267 | no MR | male   | 11 | 15 |                      | 7  | 91  | 89  | 89 | 76  |
| Si249 | no MR | male   | 11 | 8  | Caucasian            | 6  | 95  | 89  | 89 | 85  |
| Si80  | no MR | male   | 6  | 6  | Caucasian            | 6  | 87  | 95  | 90 | 85  |
| Si97  | no MR | male   | 10 | 8  | Caucasian            | 10 | 87  | 93  | 90 | 75  |
| Si102 | no MR | male   | 9  | 10 |                      | 10 | 93  | 92  | 90 | 77  |
| Si119 | no MR | male   | 9  | 9  | Caucasian            | 10 | 86  | 94  | 90 | 84  |
| Si183 | no MR | male   | 13 | 7  | Asian                | 7  | 73  | 102 | 90 | 66  |
| Si168 | no MR | male   | 19 | 7  | Caucasian            |    | 104 | 84  | 90 | 65  |
| Si8   | no MR | male   | 16 | 15 |                      | 7  | 93  | 91  | 91 | 66  |
| Si49  | no MR | male   | 12 | 8  | Caucasian            | 4  | 88  | 94  | 91 | 73  |
| Si85  | no MR | male   | 13 | 14 |                      | 9  | 81  | 101 | 91 | 80  |
| Si88  | no MR | female | 7  | 6  | Caucasian            | 5  | 91  | 94  | 91 | 83  |
| Si153 | no MR | male   | 10 | 16 |                      | 10 | 74  | 103 | 91 | 75  |
| Si128 | no MR | male   | 8  | 15 |                      | 7  | 83  | 98  | 91 | 69  |
| Si315 | no MR | male   | 9  | 12 |                      | 10 | 97  | 89  | 91 | 81  |
| Si144 | no MR | male   | 10 | 13 |                      | 10 | 82  | 96  | 92 | 71  |
| Si194 | no MR | male   | 9  | 13 | Caucasian            | 10 | 104 | 87  | 92 | 70  |
| Si339 | no MR | male   | 8  | 17 | Caucasian            | 8  | 91  | 95  | 92 | 76  |
| Si337 | no MR | male   | 8  | 10 | Caucasian            | 6  | 104 | 90  | 93 | 92  |
| Si218 | no MR | male   | 11 | 15 | Caucasian            | 10 | 96  | 93  | 93 | 90  |
| Si338 | no MR | male   | 11 | 10 | Caucasian            | 9  | 82  | 101 | 93 | 80  |
| Si116 | no MR | male   | 7  | 9  | Caucasian            | 10 | 88  | 100 | 94 | 68  |
| Si184 | no MR | male   | 10 | 17 |                      | 10 | 77  | 105 | 94 | 70  |
| Si124 | no MR | male   | 14 | 7  | u                    | 6  | 77  | 105 | 94 | 67  |
| Si213 | no MR | male   | 10 | 8  | Caucasian            | 7  | 89  | 100 | 94 | 96  |
| Si252 | no MR | male   | 13 | 10 | African-<br>American | 8  | 106 | 89  | 94 | 78  |

|       |       |        |    |    |                  |    |     |     |     |     |
|-------|-------|--------|----|----|------------------|----|-----|-----|-----|-----|
| Si290 | no MR | male   | 8  | 11 | Caucasian        | 6  | 93  | 97  | 94  | 64  |
| Si291 | no MR | male   | 10 | 11 | African-American | 4  | 110 | 86  | 94  | 88  |
| Si317 | no MR | male   | 16 | 7  |                  | 8  | 98  | 94  | 95  | 93  |
| Si18  | no MR | male   | 13 | 6  | Hispanic         | 9  | 106 | 91  | 96  | 78  |
| Si19  | no MR | male   | 8  | 15 | Caucasian        | 6  | 101 | 95  | 96  | 66  |
| Si63  | no MR | male   | 11 | 13 | Caucasian        | 9  | 81  | 106 | 96  | 71  |
| Si108 | no MR | female | 8  | 10 | Caucasian        | 9  | 98  | 97  | 96  | 87  |
| Si35  | no MR | male   | 17 | 17 |                  | 8  | 96  | 98  | 97  | 66  |
| Si46  | no MR | female | 6  | 12 |                  | 10 | 94  | 100 | 97  | 86  |
| Si72  | no MR | male   | 17 | 6  |                  | 5  | 89  | 102 | 97  | 69  |
| Si73  | no MR | male   | 16 | 13 | Caucasian        | 9  | 83  | 108 | 97  | 85  |
| Si135 | no MR | male   | 13 | 7  |                  | 5  | 108 | 93  | 97  | 88  |
| Si193 | no MR | male   | 8  | 15 |                  | 8  | 84  | 106 | 97  | 86  |
| Si284 | no MR | male   | 11 | 13 | Caucasian        | 9  | 106 | 92  | 97  | 68  |
| Si236 | no MR | male   | 13 | 14 | Caucasian        | 7  | 98  | 102 | 97  | 68  |
| Si69  | no MR | male   | 6  | 11 |                  | 5  | 95  | 101 | 98  | 62  |
| Si331 | no MR | male   | 12 | 11 |                  | 8  | 86  | 104 | 98  | 73  |
| Si228 | no MR | male   | 10 | 6  | Caucasian        | 10 | 89  | 107 | 99  | 96  |
| Si334 | no MR | male   | 15 | 7  |                  | 9  | 100 | 123 | 99  | 76  |
| Si17  | no MR | male   | 9  | 10 | Caucasian        | 7  | 102 | 100 | 100 | 91  |
| Si255 | no MR | male   | 6  | 9  |                  | 5  | 99  | 101 | 100 | 88  |
| Si244 | no MR | male   | 17 | 10 | Caucasian        | 9  | 102 | 110 | 100 | 58  |
| Si10  | no MR | male   | 7  | 17 | Caucasian        | 9  | 103 | 100 | 101 | 80  |
| Si15  | no MR | male   | 14 | 8  | Caucasian        | 4  | 86  | 109 | 101 | 84  |
| Si82  | no MR | male   | 14 | 8  |                  | 4  | 104 | 100 | 101 | 81  |
| Si104 | no MR | male   | 11 | 6  | Caucasian        | 9  | 90  | 88  | 101 | 80  |
| Si350 | no MR | male   | 7  | 17 | Caucasian        | 6  | 115 | 93  | 101 | 82  |
| Si189 | no MR | female | 9  | 14 | Hispanic         | 10 | 99  | 119 | 101 | 72  |
| Si316 | no MR | female | 10 | 14 | Caucasian        | 7  | 122 | 90  | 101 | 92  |
| Si327 | no MR | male   | 8  | 17 |                  | 9  | 106 | 96  | 101 | 83  |
| Si165 | no MR | male   | 14 | 7  |                  | 8  | 98  | 127 | 102 | 76  |
| Si191 | no MR | male   | 12 | 15 |                  | 7  | 108 | 102 | 102 | 76  |
| Si237 | no MR | male   | 13 | 17 | Hispanic         | 6  | 104 | 108 | 102 | 68  |
| Si322 | no MR | male   | 12 | 9  |                  | 10 | 80  | 114 | 102 | 76  |
| Si148 | no MR | female | 6  | 16 | Caucasian        | 5  | 107 | 100 | 103 | 87  |
| Si155 | no MR | male   | 13 | 8  | Caucasian        | 8  | 120 | 93  | 103 | 80  |
| Si179 | no MR | male   | 10 | 16 | Caucasian        | 5  | 94  | 108 | 103 | 81  |
| Si292 | no MR | male   | 14 | 11 |                  | 9  | 100 | 105 | 103 | 72  |
| Si27  | no MR | male   | 17 | 14 | Caucasian        | 7  | 93  | 110 | 104 | 65  |
| Si99  | no MR | male   | 10 | 12 | Caucasian        | 4  | 100 | 107 | 104 | 94  |
| Si198 | no MR | male   | 10 | 8  | ai               | 7  | 105 | 103 | 104 | 103 |
| Si233 | no MR | male   | 10 | 16 | Asian            | 7  | 85  | 114 | 104 | 78  |

|       |       |        |    |    |           |    |     |     |     |     |
|-------|-------|--------|----|----|-----------|----|-----|-----|-----|-----|
| Si299 | no MR | male   | 9  | 7  |           | 9  | 102 | 104 | 104 | 76  |
| Si307 | no MR | male   | 15 | 13 | Caucasian | 9  | 96  | 111 | 104 | 70  |
| Si320 | no MR | male   | 9  | 11 |           | 7  | 110 | 101 | 104 | 90  |
| Si270 | no MR | male   | 12 | 12 |           | 6  | 96  | 109 | 104 | 76  |
| Si16  | no MR | male   | 11 | 6  | Caucasian | 10 | 108 | 100 | 105 | 66  |
| Si32  | no MR | male   | 7  | 8  |           | 6  | 85  | 115 | 105 | 100 |
| Si175 | no MR | female | 16 | 10 |           | 5  | 105 | 105 | 105 | 72  |
| Si174 | no MR | male   | 9  | 14 | Asian     | 7  | 104 | 104 | 105 | 82  |
| Si12  | no MR | male   | 7  | 12 |           | 8  | 99  | 108 | 106 | 87  |
| Si30  | no MR | male   | 11 | 10 | Caucasian | 8  | 113 | 102 | 106 | 71  |
| Si110 | no MR | male   | 6  | 6  | Caucasian | 6  | 97  | 111 | 106 | 88  |
| Si122 | no MR | female | 8  | 12 | Caucasian | 6  | 122 | 95  | 106 | 80  |
| Si328 | no MR | male   | 10 | 16 | Caucasian | 8  | 86  | 129 | 106 | 84  |
| Si226 | no MR | male   | 12 | 9  | Caucasian | 4  | 91  | 112 | 106 | 77  |
| Si43  | no MR | male   | 9  | 14 |           | 10 | 114 | 104 | 107 | 93  |
| Si95  | no MR | male   | 8  | 15 | Caucasian | 5  | 98  | 112 | 107 | 73  |
| Si142 | no MR | male   | 6  | 10 | Caucasian | 4  | 117 | 99  | 107 | 90  |
| Si157 | no MR | male   | 12 | 14 |           | 4  | 119 | 100 | 107 | 78  |
| Si199 | no MR | male   | 9  | 9  | Caucasian | 6  | 101 | 109 | 107 |     |
| Si58  | no MR | male   | 8  | 15 |           | 6  | 90  | 117 | 108 | 82  |
| Si336 | no MR | male   | 7  | 10 | Hispanic  | 8  | 111 | 104 | 108 | 96  |
| Si20  | no MR | male   | 12 | 14 | Caucasian | 7  | 123 | 101 | 109 | 68  |
| Si22  | no MR | male   | 6  | 15 | Caucasian | 8  | 104 | 111 | 109 | 89  |
| Si23  | no MR | male   | 9  | 17 | Caucasian | 5  | 105 | 110 | 109 | 96  |
| Si26  | no MR | male   | 8  | 7  | Caucasian | 6  | 106 | 109 | 109 | 92  |
| Si87  | no MR | male   | 15 | 16 | Caucasian | 9  | 114 | 117 | 109 | 81  |
| Si170 | no MR | male   | 18 | 17 | Caucasian |    | 128 | 97  | 109 | 77  |
| Si283 | no MR | male   | 10 | 14 | Caucasian | 9  | 99  | 125 | 109 | 89  |
| Si300 | no MR | male   | 8  | 11 |           | 5  | 114 | 103 | 109 | 86  |
| Si313 | no MR | male   | 13 | 13 | Caucasian | 8  | 108 | 108 | 109 | 75  |
| Si29  | no MR | female | 8  | 7  | Caucasian | 6  | 105 | 111 | 110 | 83  |
| Si314 | no MR | male   | 7  | 10 | Caucasian | 10 | 109 | 109 | 110 | 94  |
| Si42  | no MR | female | 6  | 15 |           | 8  | 107 | 111 | 111 | 85  |
| Si180 | no MR | male   | 19 | 7  | Caucasian |    | 129 | 100 | 111 | 73  |
| Si349 | no MR | male   | 19 | 13 |           |    | 128 | 100 | 111 | 71  |
| Si248 | no MR | male   | 9  | 8  |           | 5  | 119 | 103 | 111 | 77  |
| Si279 | no MR | male   | 19 | 14 | Caucasian |    | 128 | 101 | 111 | 64  |
| Si77  | no MR | male   | 14 | 12 |           | 6  | 114 | 109 | 112 | 74  |
| Si211 | no MR | male   | 10 | 12 | Caucasian | 7  | 108 | 115 | 112 | 91  |
| Si67  | no MR | male   | 7  | 17 | Caucasian | 6  | 123 | 104 | 113 | 100 |
| Si235 | no MR | male   | 10 | 7  | Caucasian | 9  | 99  | 119 | 113 | 95  |
| Si256 | no MR | female | 14 | 8  |           | 4  | 107 | 114 | 113 | 77  |
| Si57  | no MR | male   | 11 | 11 | Caucasian | 6  | 117 | 111 | 114 | 83  |

|       |       |        |    |    |           |    |     |     |     |     |
|-------|-------|--------|----|----|-----------|----|-----|-----|-----|-----|
| Si70  | no MR | male   | 10 | 13 | Caucasian | 8  | 118 | 111 | 114 | 83  |
| Si125 | no MR | male   | 10 | 7  | Caucasian | 8  | 117 | 111 | 114 | 89  |
| Si207 | no MR | male   | 7  | 8  |           | 7  | 113 | 111 | 114 | 91  |
| Si294 | no MR | female | 10 | 12 |           | 7  | 121 | 109 | 114 | 73  |
| Si263 | no MR | male   | 11 | 14 |           | 6  | 121 | 117 | 114 | 79  |
| Si61  | no MR | male   | 13 | 11 |           | 6  | 128 | 106 | 115 | 67  |
| Si92  | no MR | male   | 6  | 16 | Caucasian | 4  | 98  | 123 | 115 | 86  |
| Si93  | no MR | male   | 14 | 10 | Caucasian | 4  | 111 | 114 | 115 | 80  |
| Si132 | no MR | female | 16 | 11 |           |    | 117 | 113 | 115 | 72  |
| Si33  | no MR | male   | 19 | 11 |           |    | 114 | 115 | 116 | 89  |
| Si103 | no MR | male   | 8  | 8  | Caucasian | 6  | 103 | 121 | 116 | 106 |
| Si215 | no MR | male   | 11 | 12 | Hispanic  | 6  | 120 | 112 | 116 | 77  |
| Si143 | no MR | male   | 10 | 8  |           | 4  | 108 | 119 | 117 | 84  |
| Si208 | no MR | male   | 14 | 15 |           | 4  | 84  | 132 | 117 | 61  |
| Si231 | no MR | male   | 9  | 9  | Caucasian | 6  | 111 | 117 | 117 | 93  |
| Si196 | no MR | male   | 17 | 14 |           |    | 116 | 117 | 118 | 74  |
| Si275 | no MR | male   | 15 | 11 |           | 7  | 130 | 109 | 118 | 77  |
| Si206 | no MR | male   | 13 | 17 | Caucasian | 8  | 114 | 119 | 119 | 101 |
| Si246 | no MR | male   | 18 | 15 |           |    | 117 | 118 | 119 | 59  |
| Si202 | no MR | male   | 14 | 11 | Caucasian | 4  | 123 | 115 | 120 | 84  |
| Si223 | no MR | female | 19 | 8  |           |    | 121 | 125 | 120 | 59  |
| Si45  | no MR | male   | 9  | 14 |           | 7  | 95  | 131 | 121 | 86  |
| Si60  | no MR | male   | 10 | 16 | Caucasian | 6  | 107 | 125 | 121 | 76  |
| Si114 | no MR | female | 11 | 15 | Caucasian | 8  | 119 | 119 | 121 | 96  |
| Si121 | no MR | male   | 9  | 9  | Caucasian | 5  | 136 | 110 | 121 | 91  |
| Si149 | no MR | male   | 13 | 13 |           | 8  | 131 | 112 | 121 | 74  |
| Si240 | no MR | male   | 7  | 13 |           | 6  | 114 | 123 | 122 | 83  |
| Si265 | no MR | male   | 10 | 13 |           | 10 | 136 | 111 | 122 | 76  |
| Si295 | no MR | female | 19 | 15 | Hispanic  |    | 140 | 109 | 123 | 69  |
| Si51  | no MR | male   | 12 | 12 |           | 7  | 113 | 129 | 127 | 95  |
| Si71  | no MR | male   | 15 | 11 | Caucasian | 5  | 128 | 124 | 127 | 96  |
| Si160 | no MR | male   | 9  | 15 |           | 10 | 99  | 138 | 127 | 82  |
| Si1   | no MR | male   | 12 | 8  | Caucasian | 8  | 120 | 126 | 128 | 72  |
| Si37  | no MR | male   | 10 | 13 | Caucasian | 8  | 115 | 129 | 128 | 82  |
| Si239 | no MR | male   | 8  | 9  |           | 4  | 118 | 129 | 128 | 79  |
| Si209 | no MR | male   | 13 | 15 | Caucasian | 6  | 120 | 128 | 129 | 90  |
| Si219 | no MR | male   | 9  | 10 | Caucasian | 8  | 118 | 128 | 129 | 101 |
| Si293 | no MR | male   | 10 | 10 |           | 7  | 107 | 134 | 129 | 88  |
| Si38  | no MR | male   | 15 | 11 |           | 10 | 116 | 131 | 130 | 70  |
| Si105 | no MR | male   | 10 | 14 |           | 6  | 110 | 134 | 130 | 78  |
| Si107 | no MR | male   | 10 | 8  |           | 6  | 123 | 127 | 130 | 89  |
| Si167 | no MR | male   | 15 | 7  | Caucasian | 8  | 128 | 118 | 130 | 82  |
| Si332 | no MR | male   | 13 | 13 | Caucasian | 6  | 121 | 128 | 130 | 100 |



---

|       |          |        |    |    |           |    |     |     |     |    |
|-------|----------|--------|----|----|-----------|----|-----|-----|-----|----|
| Si259 | no MR    | male   | 12 | 12 |           | 9  | 119 | 137 | 132 | 79 |
| Si234 | no MR    | male   | 13 | 15 |           | 8  | 121 | 132 | 133 | 81 |
| Si188 | no MR    | male   | 9  | 17 | Caucasian | 7  | 134 | 128 | 135 | 91 |
| Si94  | no MR    | male   | 14 | 11 | Caucasian | 8  | 106 | 146 | 137 | 83 |
| Si268 | no MR    | female | 16 | 17 |           |    | 149 | 128 | 141 | 71 |
| Si296 | no MR    | male   | 18 | 10 |           |    | 143 | 132 | 141 | 68 |
| Si172 | no MR    | male   | 12 | 13 | Caucasian | 9  | 113 | 158 | 148 | 84 |
| Si54  | unknown  | male   | 8  | 10 |           |    |     |     |     |    |
| Si59  | unknown  | female | 7  | 17 |           |    |     |     |     |    |
| Si90  | unknown  | male   | 9  | 13 |           |    |     |     |     |    |
| Si112 | moderate | male   | 11 | 17 | Caucasian | 10 | 40  | 77  | ~55 | 69 |
| Si150 | unknown  | male   | 9  | 11 |           |    |     |     |     |    |
| Si154 | unknown  | male   | 7  | 11 |           |    |     |     |     |    |
| Si262 | unknown  | male   | 9  | 16 |           |    |     |     |     |    |
| Si278 | unknown  | male   | 9  | 17 |           |    |     |     |     |    |
| Si308 | unknown  | male   | 11 | 13 |           |    |     |     |     |    |
| Si330 | unknown  | male   | 12 | 6  |           |    |     |     |     |    |

---
