# Supplementary material for: Relative Burden of Large CNVs on a Range of Neurodevelopmental Phenotypes
Source: PubMed Central journal article supplement (PMC3213131; doi:10.1371/journal.pgen.1002334), 2011-11-10
Supplement: pgen.1002334.s013.pdf [file pgen.1002334.s013.pdf]

**Table S6. Clinical details of cases with idiopathic ID**

| <b>Patient Code</b> | <b>Sex</b> | <b>Age (years)</b> | <b>Phenotype</b>                                                                                                   | <b>Other genetic tests</b> |
|---------------------|------------|--------------------|--------------------------------------------------------------------------------------------------------------------|----------------------------|
| 01012               | M          | 20                 | Profound ID, Myoclonic epilepsy                                                                                    |                            |
| 01019               | F          | 27                 | Moderate ID, glycogenosis, microcephaly, ataxia, cerebellar hypoplasia and hypotrophy                              |                            |
| 01113               | M          | 34                 | Moderate ID, motor polyneuropathy, retinitis pigmentosa, CNS developmental defects                                 |                            |
| 01124               | F          | 34                 | Profound ID, Drug-resistant epilepsy, Microcephaly, Spastic tetraplegia, Perinatal hypoxic ischemic encephalopathy |                            |
| 01164               | M          | 20                 | Severe ID, dysmorphic features                                                                                     |                            |
| 01230               | F          |                    | Mild ID, PDD, epilepsy                                                                                             |                            |
| 01235               | F          | 15                 | Severe ID, Microcephaly, Tetraplegia, Ataxia                                                                       |                            |
| 01236               | M          | 24                 | Moderate ID, macrocephaly, myopathy                                                                                |                            |
| 01246               | M          | 15                 | Borderline Intellectual Functioning, ASD                                                                           |                            |
| 01274               | M          | 17                 | Severe ID, Saethre-Chotzen syndrome (ACS III)                                                                      |                            |
| 01314               | M          | 15                 | Severe ID, Obesity                                                                                                 |                            |
| 01318               | M          | 18                 | Severe ID, Macrocephaly, Ataxia, Dysmorphic features                                                               |                            |
| 01357               | M          | 24                 | Moderate ID, Saethre-Chotzen syndrome (ACS III)                                                                    |                            |
| 01398               | M          | 14                 | Profound ID, Spastic Tetraparesis, Microcephaly, CNS Malformation                                                  |                            |
| 01402               | M          | 30                 | Moderate ID, Anxiety disorder                                                                                      |                            |
| 01434               | M          |                    |                                                                                                                    |                            |
| 01438               | M          | 19                 | Moderate ID                                                                                                        |                            |
| 01447               | M          |                    |                                                                                                                    |                            |
| 01509               | M          | 27                 | Severe ID, ASD, Focal Epilepsy                                                                                     |                            |
| 01512               | M          | 15                 | Borderline Intellectual Functioning, Expressive speech impairment                                                  |                            |
| 01522               | M          | 38                 | Severe ID, Lujan-Fryns phenotype                                                                                   |                            |
| 01538               | M          |                    |                                                                                                                    |                            |
| 01540               | F          |                    |                                                                                                                    |                            |
| 01575               | M          | 26                 | Moderate ID, Psychosis                                                                                             |                            |
| 01583               | M          | 27                 | Mild ID, Neurosensory deafness, Hypoxic Ischemic Encephalopathy                                                    |                            |

---

|       |   |    |                                                                                              |          |
|-------|---|----|----------------------------------------------------------------------------------------------|----------|
| 01593 | F | 22 | Severe ID, Spastic Paraparesis, Saethre-Chotzen syndrome, Generalized Developmental Disorder |          |
| 01609 | M | 17 |                                                                                              |          |
| 01613 | F | 13 | Moderate ID, Spastic Tetraparesis, Hypoxic Ischemic Encephalopathy                           |          |
| 01616 | M | 16 | Severe ID, Pervasive Developmental Disorder                                                  |          |
| 01619 | F | 14 | Severe ID, Partial Occipital Epilepsy                                                        |          |
| 01631 | M | 14 | Severe ID, ASD, Hypospadias, Cryptorchidism                                                  |          |
| 01634 | M | 21 | Profound ID, ASD                                                                             |          |
| 01658 | F | 51 | Moderate ID, Cerebral Atrophy                                                                |          |
| 01686 | F | 16 | Severe ID, Microcephaly, IUGR                                                                |          |
| 01705 | M | 22 | Severe MCA/ID, PDD, Epilepsy                                                                 |          |
| 01728 | M | 24 | Moderate ID, Obesity, Astigmatism                                                            |          |
| 01746 | M | 19 | Moderate MCA/ID, Partial Epilepsy                                                            |          |
| 01755 | M | 12 | Mild ID, Craniosynostosis                                                                    |          |
| 01827 | M | 22 | Moderate ID, Partial Epilepsy, Perinatal Hypoxic Ischemic Encephalopathy                     |          |
| 01833 | F | 11 | Severe MCA/ID, Microcephaly, PDD                                                             |          |
| 01856 | M | 16 | Severe ID, PDD                                                                               |          |
| 01879 | F | 19 | Severe ID, Partial Epilepsy                                                                  |          |
| 01883 | F | 26 | Borderline Intellectual Functioning, Psychosis, MCA                                          |          |
| 01893 | F | 17 | Mild ID                                                                                      |          |
| 01911 | M | 21 | Moderate ID, Microcephaly, Partial Epilepsy                                                  |          |
| 01930 | M | 34 | Probable Autosomal Dominant Cerebellar Ataxia                                                | Frataxin |
| 01959 | M | 42 | Borderline Intellectual Functioning, Cerebellar Ataxia, Spastic Paraparesis, Polyneuropathy  |          |
| 01977 | F | 19 | Mild ID, Epilepsy, Congenital Cerebellar Ataxia, Left Parieto-Occipital Ischemic Lesion      |          |
| 01996 | M | 13 | Moderate ID, PDD                                                                             |          |
| 02003 | M | 11 | Severe ID                                                                                    |          |
| 0201  | M | 38 | Severe ID, Lujan-Fryns phenotype                                                             |          |
| 02012 | M | 72 | Mild ID, Cerebellar Ataxia, Neurosensory Deafness, Cerebral and                              | SCA      |

---

|       |   |    | Cerebellar Atrophy                                                                                                                         |            |
|-------|---|----|--------------------------------------------------------------------------------------------------------------------------------------------|------------|
| 0203  | F | 21 | Severe ID, Spastic Paraparesis, Motor Axonal Neuropathy                                                                                    |            |
| 02031 | M | 13 | Severe ID, PDD                                                                                                                             |            |
| 02040 | F | 93 | Cognitive Decline, Cortical Atrophy, Hypertension, Chronic Renal Failure                                                                   |            |
| 02043 | M | 64 | Cerebellar Ataxia                                                                                                                          |            |
| 02055 | F | 40 | Severe ID, Spastic Tetraparesis, Ataxia, Epilepsy, Microcephaly, Sensory Motor Neuropathy, Cerebral and Cerebellar Atrophy                 |            |
| 02082 | M | 25 | Mild ID, Saethre-Chotzen syndrome (ACS III)                                                                                                | TWIST gene |
| 02087 | M | 18 | Partial Epilepsy, Perinatal Hypoxic Ischemic Encephalopathy, Anxiety Disorder, Marfanoid Habitus                                           |            |
| 02092 | F | 12 | Moderate MCA/ID, karyotype 46,XX,15p+                                                                                                      | Karyotype  |
| 02099 | M | 28 | Severe ID                                                                                                                                  |            |
| 02106 | M | 12 | Moderate ID, Ectodermal Dysplasia NOS                                                                                                      |            |
| 02110 | M | 38 | Schizoid Personality Disorder, Myopathy, Macrocephaly                                                                                      |            |
| 02117 | M | 26 | Mild ID, PDD                                                                                                                               |            |
| 02120 | M | 33 | Moderate ID, Mild cerebral and cerebellar vermis atrophy                                                                                   |            |
| 02129 | M | 15 | NOS ID, Infantile Psychosis                                                                                                                |            |
| 02139 | M | 20 | Moderate ID, Microcephaly, Left Spastic Hemiparesis, Partial Epilepsy, Widespread Dysarrangement of Neuronal Migration and Cortical set-up |            |
| 02140 | F | 40 | Profound ID, Spastic Tetraparesis, Microcephaly, CNS Malformation                                                                          |            |
| 02147 | M | 9  | ADHD, Craniosynostosis                                                                                                                     |            |
| 02154 | F | 10 | Mild ID                                                                                                                                    |            |
| 02159 | M | 13 | Mild ID, Tetraplegia, Probable Hallervorden-Spatz disease                                                                                  |            |
| 02160 | F | 16 | Moderate ID, Spastic Tetraparesis, Mitochondrial Encephalomyopathy with POLG1 gene Mutation                                                | POLG1 gene |
| 02174 | F |    |                                                                                                                                            |            |
| 02175 | F | 11 | Mild ID                                                                                                                                    |            |
| 02182 | F | 17 | Moderate ID, Arnold-Chiari I, Syringomyelia, Psychosis                                                                                     |            |
| 02184 | M | 26 | Borderline Intellectual Functioning, Anxiety Disorder. Crouzon Syndrome                                                                    |            |
| 02185 | F | 10 | NOS MCA/ID                                                                                                                                 |            |
| 02186 | M | 13 | Severe ID, Schimmelpenning-Feuerstein syndrome                                                                                             |            |

---

|       |   |                 |                                                                      |                              |
|-------|---|-----------------|----------------------------------------------------------------------|------------------------------|
| 02200 | M | 65              |                                                                      |                              |
| 02701 | M | Dead 9-year-old | Profound ID, CNS Malformation, Familiar Lissencephaly                |                              |
| 02222 | M | 9               | Mild ID, ACS                                                         | MLPA Genes Craniosynostosis  |
| 02223 | F | 10              | Mild ID                                                              |                              |
| 02227 | M | 21              | NOS ID, NOD PDD                                                      | TWIST gene, FGFR gene        |
| 02237 | M | 11              | Miopathy                                                             |                              |
| 02245 | F | 37              | Profound ID, Mosaic Turner syndrome, Crouzon Craniosynostosis        | Karyotype                    |
| 02248 | M | 19              | Profound ID, ASD, Microcephaly                                       |                              |
| 02257 | F | 17              | Moderate ID                                                          | TWIST and FGFRs genes        |
| 02259 | M | 12              | Borderline Intellectual Functioning, Microcephaly, ADHD, Miopathy    | FRAXA, FRAXE                 |
| 02304 | M | 8               | NOS ID, Plagiocephaly, Brachycephaly                                 | TWIST and FGFRs genes        |
| 0231  | M | 36              | NOS ID, Schizophrenia, Dysmorphic features                           |                              |
| 02322 | M | 25              | Severe ID, Miopathy, Dysmorphic features                             |                              |
| 02325 | M | 16              | Severe MCA/ID, Craniosynostosis                                      | TWIST and FGFRs genes        |
| 02334 | M | 17              | Moderate ID, PDD, Miopathy                                           | POLG1 gene                   |
| 02412 | M | 23              | Severe ID, Psychosis                                                 | Subtelomeric FISH            |
| 02417 | F | 17              | Moderate ID, PDD, Fetal Alcohol Syndrome                             |                              |
| 02423 | M | 9               |                                                                      |                              |
| 02424 | M |                 | NOS ID                                                               |                              |
| 02427 | F | 11              |                                                                      |                              |
| 02433 | M | 15              | Mild ID, PDD, Partial Epilepsy, Left Hemihypertrophy                 |                              |
| 02434 | M | 15              | Moderate ID, Psychosis                                               |                              |
| 02437 | F | 26              | Mild ID, Schizophrenia                                               |                              |
| 02438 | F | 16              | Mild ID, Partial Epilepsy, Perinatal Hypoxic Ischemic Encephalopathy |                              |
| 02442 | M | 17              |                                                                      |                              |
| 02443 | F | 23              | Moderate ID, Epilepsy, Polimicrogiria, Schizencephaly                | Karyotype, Subtelomeric MLPA |
| 02447 | F | 27              | Moderate ID                                                          |                              |
| 02448 | M | 26              | Moderate ID, Partial Epilepsy                                        |                              |

---

|       |   |    |                                                                              |                                             |
|-------|---|----|------------------------------------------------------------------------------|---------------------------------------------|
| 02449 | M | 34 | Moderate ID, Spastic Tetraparesis, Perinatal Hypoxic Ischemic Encephalopathy | Karyotype, PQBP1 gene                       |
| 02450 | M | 7  | Right Hemiparesis                                                            |                                             |
| 02452 | M | 19 | Moderate MCA/ID                                                              |                                             |
| 02453 | M | 28 | Profound ID, AR Primary Microcephaly                                         |                                             |
| 02455 | M | 10 | Borderline Intellectual Functioning                                          |                                             |
| 02456 | F | 9  | NOS MCA/ID, PDD                                                              | Karyotype, Subtelomeric MLPA                |
| 02457 | M | 25 | Moderate MCA/ID, Epilepsy                                                    | Subtelomeric MLPA                           |
| 02458 | M | 18 | Severe ID, ASD                                                               | Subtelomeric MLPA                           |
| 02459 | M | 35 | Mild ID, Microcephaly, Miopathy                                              |                                             |
| 02461 | M | 11 | NOS ID, PDD                                                                  |                                             |
| 02462 | M | 14 | ASD High Functioning                                                         |                                             |
| 02464 | F | 12 | Mild ID, Epilepsy, Down Syndrome                                             | Karyotype                                   |
| 02465 | F | 11 | Moderate ID, Down Syndrome                                                   | Karyotype                                   |
| 02466 | M | 15 | Mild ID, Psychosis, Obesity                                                  |                                             |
| 02467 | M | 18 | ASD, Borderline Intellectual Functioning                                     |                                             |
| 02470 | M | 9  | Borderline Intellectual Functioning, Perthes Disease                         |                                             |
| 02471 | F | 13 | Profound ID, Spastic Tetraparesis, Microcephaly, Motor peripheral neuropathy |                                             |
| 02473 | F | 15 | Mild ID, Microcephaly, EEG anomalies                                         |                                             |
| 02475 | M | 23 | Mild ID, Anxiety Disorder                                                    | Karyotype, Subtelomeric MLPA                |
| 02477 | F | 10 | Moderate ID                                                                  |                                             |
| 02478 | M | 17 | Borderline Intellectual Functioning, OCD, Partial Epilepsy                   | PTEN gene                                   |
| 02479 | M | 6  | CHD, Normal Intellectual Functioning                                         | Karyotype, FISH 22q11.23, Subtelomeric MLPA |
| 02480 | M | 11 | Severe ID, PDD                                                               |                                             |
| 02482 | F | 9  | Down Syndrome, Moderate ID, Hypothyroidism                                   | Karyotype                                   |
| 02485 | F | 17 | Left Hemiparesis, Normal Intellectual Functioning                            | Karyotype, Subtelomeric MLPA                |
| 02487 | M | 35 | Severe MCA/ID, EEG and EMG anomalies                                         | Subtelomeric MLPA                           |
| 02491 | M | 10 | Expressive Speech Disorder                                                   | FISH 22q11.23, Subtelomeric MLPA            |

---

|       |   |    |                                                         |                              |
|-------|---|----|---------------------------------------------------------|------------------------------|
| 02492 | M | 8  | Severe ID, 18p Tetrasomy                                | Karyotype                    |
| 02493 | M | 19 | NOS ID, ASD                                             | Subtelomeric MLPA            |
| 02494 | F | 44 | Profound MCA/ID                                         | Karyotype, Subtelomeric MLPA |
| 02495 | M | 29 | Mild ID, Psychotic Disorder                             | PTEN gene                    |
| 02496 | M | 9  | Moderate ID, ASD                                        | PTEN gene                    |
| 02500 | F | 15 | Mild ID, Early Onset Psychosis                          | Subtelomeric MLPA            |
| 02502 | M | 23 | Severe ID, Triplication Critical Region 21q 22.13-q22.2 | Karyotype, LSI21 FISH        |
| 02503 | M | 33 | Borderline Intellectual Functioning, Partial Epilepsy   |                              |
| 02508 | M | 8  | Mild MCA/ID                                             |                              |
| 02509 | M | 10 | Mild ID, Dysmorphic features                            | Karyotype, Subtelomeric MLPA |
| 02510 | M | 21 | Mild ID                                                 | Karyotype, Subtelomeric MLPA |
| 02511 | F | 11 | Moderate MCA/ID, PDD                                    |                              |
| 02512 | M | 27 | Profound ID. Partial 11p Trisomy                        | Karyotype                    |
| 02513 | M | 22 | Mild ID                                                 | Karyotype, Subtelomeric MLPA |
| 02514 | M | 18 | Moderate ID                                             | Karyotype, Subtelomeric MLPA |
| 02515 | M | 13 | ADHD, BIF                                               | Karyotype, Subtelomeric MLPA |
| 02518 | F | 25 | Mild ID                                                 | Karyotype, Subtelomeric MLPA |
| 02520 | M | 9  | Mild ID, ASD                                            | Karyotype, Subtelomeric MLPA |
| 02521 | M | 15 | Learning Disability, Obesity                            |                              |
| 02522 | F | 26 | Severe ID, Partial Trisomy 15                           | Karyotype                    |
| 02524 | M | 7  | NOS ID, Spastic Tetraparesis                            |                              |
| 02525 | M | 21 | Mild ID                                                 | Karyotype, Subtelomeric MLPA |
| 02526 | M | 16 | Moderate ID, ASD                                        |                              |
| 02528 | F | 11 | Moderate ID, OCD                                        |                              |
| 02529 | M | 18 | Severe ID, ASD, EEG anomalies                           | Subtelomeric MLPA            |
| 02531 | M | 26 | Moderate ID, OCD                                        | Karyotype, Subtelomeric MLPA |
| 02532 | F | 25 | Mild ID, Psychosis, Neurosensory Deafness               | Karyotype, Subtelomeric MLPA |
| 02533 | F | 16 | Mild ID, OCD                                            |                              |
| 02535 | M | 19 | Moderate ID, ASD                                        | Karyotype, Subtelomeric MLPA |

---

---

|       |   |    |                                                |                                     |
|-------|---|----|------------------------------------------------|-------------------------------------|
| 02537 | F | 16 | Moderate ID                                    |                                     |
| 02538 | F | 16 | Mild ID, ADHD                                  |                                     |
| 02539 | M | 8  | Severe ID, Epilepsy                            |                                     |
| 02542 | F | 28 | Severe ID, Obesity                             | Subtelomeric MLPA                   |
| 02543 | F | 19 | Mild ID, Microcephaly, Spastic Tetraparesis    | Subtelomeric MLPA                   |
| 02546 | M | 9  | Mild ID                                        | Karyotype, Subtelomeric MLPA        |
| 02547 | F | 8  | NOS ID                                         | Karyotype, Subtelomeric MLPA        |
| 02548 | F | 10 | Severe ID, PDD                                 |                                     |
| 02550 | M | 21 | BIF, Psychosis, EEG Anomalies                  | Karyotype, Subtelomeric MLPA, FraXE |
| 02551 | M | 15 | Mild ID, ADHD, Obesity                         | Karyotype, Subtelomeric MLPA        |
| 02553 | F | 34 | ADCA2                                          | SCA2                                |
| 02554 | F | 46 | SCA                                            | SCA                                 |
| 02555 | F | 15 | Mild MCA/ID, Paraparesis, Immune Dysfunction   | PTEN gene                           |
| 02557 | M | 11 | Mild ID                                        | Subtelomeric MLPA                   |
| 02560 | M | 10 | Mild ID, Diplegia, Microcephaly                | Subtelomeric MLPA                   |
| 02561 | F | 7  | Aicardi syndrome, Infantile Spasms, Severe ID  |                                     |
| 02562 | F | 17 | Mild ID, Epilepsy, Spastic Diplegia            | Kartotype, Subtelomeric MLPA        |
| 02563 | M | 12 | Severe ID, ASD                                 |                                     |
| 02566 | M | 36 | Down syndrome, Severe ID, Epilepsy             | Karyotype                           |
| 02568 | M | 59 | Narcolepsy                                     |                                     |
| 02569 | M | 28 | NOS ID, Psychosis, Macrocephaly, EEG anomalies | Karyotype, PTEN and FMR-1 genes     |
| 02571 | M | 14 | Mild ID, PDD, Obesity                          | Subtelomeric MLPA, PTEN Gene        |
| 02572 | M | 15 | BIF, PDD                                       | Subtelomeric MLPA                   |
| 02573 | M | 7  | Mild ID                                        |                                     |
| 02574 | F | 57 | Ataxia                                         | SCA                                 |
| 02575 | F | 23 | BIF, Partial Epilepsy, Microcephaly            | Karyotype                           |
| 02576 | F | 18 | Moderate ID                                    | Subtelomeric MLPA                   |
| 02577 | M | 13 | BIF, ADHD                                      |                                     |
| 02578 | F | 18 | Mild ID, Early Onset Psychosis                 | Karyotype, FISH 22q11.23            |

---

|       |   |    |                                                                  |                                                             |
|-------|---|----|------------------------------------------------------------------|-------------------------------------------------------------|
| 02579 | M | 12 | BIF, MCA                                                         | Subtelomeric MLPA. FISH 22q11.23                            |
| 02580 | M | 12 | BIF                                                              | Subtelomeric MLPA. FISH 22q11.23                            |
| 02581 | M | 31 | Moderate MCA/ID                                                  | PTEN gene                                                   |
| 02582 | M | 11 | NOS ID, ASD                                                      | Subtelomeric MLPA                                           |
| 02585 | M | 11 | Mild ID, Left Hemiparesis                                        | PQBP-1 gene                                                 |
| 02586 | M | 12 | NOS ID, PDD                                                      | Subtelomeric MLPA                                           |
| 02587 | F | 45 | AR Microcephaly                                                  |                                                             |
| 02589 | M | 10 | Severe ID                                                        |                                                             |
| 02590 | F | 22 | NOS MCA/ID, Epilepsy                                             | Karyotype                                                   |
| 02592 | F | 12 | NOS, MCA/ID, PDD                                                 | Subtelomeric MLPA, MECP-2                                   |
| 02593 | M | 16 | Moderate ID, Myoclonic Epilepsy                                  |                                                             |
| 02595 | F | 7  | NOS ID, Microcephaly, Tetraparesis                               | Subtelomeric MLPA                                           |
| 02598 | F | 12 | Williams syndrome, Mild ID                                       | FISH 7q11.23                                                |
| 02599 | M | 11 | Severe MCA/ID                                                    |                                                             |
| 02601 | F | 9  | Ophthalmoplegia Cerebellar Hypoplasia                            |                                                             |
| 02602 | F | 30 | Severe ID, Epilepsy, Microcephaly                                |                                                             |
| 02604 | M | 7  | Mild ID                                                          |                                                             |
| 02605 | M | 33 | Profound MCA/ID, Tetraparesis, Partial Epilepsy                  | Karyotype                                                   |
| 02609 | M | 48 | Severe MCA/ID                                                    | Subtelomeric MLPA                                           |
| 02610 | F | 20 | Moderate ID, ASD                                                 | Subtelomeric MLPA                                           |
| 02612 | M | 7  | Severe ID, Epilepsy                                              | Subtelomeric MLPA, ARX gene,<br>Mitochondrial DNA screening |
| 02615 | M | 11 | BIF, PDD, Craniosynostosis                                       | Karyotype, TWIST and FGFRs genes,<br>Subtelomeric MLPA      |
| 02620 | M | 16 | BIF, Early Onset Psychosis, Macrocephaly                         | Karyotype, PTEN gene                                        |
| 02623 | F | 17 |                                                                  |                                                             |
| 02624 | F | 9  | BIF, Trigonocephaly                                              | TWIST and FGFRs genes                                       |
| 02627 | M | 8  | Mild ID, PDD                                                     | Subtelomeric MLPA                                           |
| 02628 | M | 66 | Spastic Tetraparesis, Medullary Focal Atrophy by Ischemic lesion |                                                             |
| 02630 | F | 9  | MCA, Cytomegalovirus Connatal Infection                          |                                                             |

---

|       |   |    |                                                                                                                   |                                     |
|-------|---|----|-------------------------------------------------------------------------------------------------------------------|-------------------------------------|
| 02635 | F | 49 | Severe ID, Epilepsy, ASD                                                                                          |                                     |
| 02636 | M | 26 | Severe ID, ASD                                                                                                    |                                     |
| 02637 | M | 35 | Profound MCA/ID, Epilepsy, Immune Deficiency                                                                      |                                     |
| 02638 | M | 7  | NOS ID, Unbalanced 4-15 translocation 4q35 and 15 PTER@q12 deletions. Phenotype compatible with Angelman syndrome | Karyotype, FISH                     |
| 02639 | M | 18 | Severe MCA/ID                                                                                                     | Karyotype, Subtelomeric MLPA, FMR-1 |
| 02641 | M | 8  | Expressive speech delay, Dolichocephaly                                                                           | Karyotype, Subtelomeric MLPA        |
| 02642 | M | 22 | Profound ID, Epilepsy, Spastic Tetraparesis, Perinatal Hypoxic Ischemic Encephalopathy                            | ARX gene                            |
| 02643 | M | 20 | Severe ID, ASD, Right Neurosensory Deafness                                                                       |                                     |
| 02644 | F | 10 | Mild ID, Brachycephaly                                                                                            |                                     |
| 02645 | M | 8  | Severe ID, Spastic Tetraparesis, Partial Epilepsy                                                                 | Subtelomeric MLPA                   |
| 02653 | M | 13 | Moderate ID, Psychosis                                                                                            |                                     |
| 02656 | M | 14 | Severe ID, PDD                                                                                                    | Subtelomeric MLPA                   |
| 02770 | M | 10 | Mild ID                                                                                                           |                                     |
| 02853 | F | 14 | Moderate ID, Generalized Epilepsy                                                                                 |                                     |
| 03058 | M | 14 | Moderate ID, Hyperactivity                                                                                        |                                     |
| 03182 | M | 15 | Mild ID, OCD                                                                                                      |                                     |
| 03183 | F | 33 | NOS ID                                                                                                            | Karyotype                           |
| 03184 | M | 45 | Severe MCA/ID, Psychosis                                                                                          |                                     |
| 03185 | M | 9  |                                                                                                                   |                                     |
| 03187 | M | 8  | Mild MCA/ID, NOS Nuromuscular disease                                                                             |                                     |
| 03188 | F | 13 | NOS ID, Tetraparesis, Microcephaly                                                                                |                                     |
| 03189 | M | 9  | Mild ID                                                                                                           |                                     |
| 03201 | M | 17 | Severe ID, PDD, Left Neurosensory Deafness                                                                        |                                     |
| 03202 | F | 22 | Severe MCA/ID, Partial Epilepsy                                                                                   |                                     |
| 03203 | M | 9  | Moderate MCA/ID, IUGR                                                                                             |                                     |
| 03204 | M | 7  | NOS ID, EEG Anomalies                                                                                             |                                     |
| 03205 | M | 5  | NOS ID, Plagiocephaly                                                                                             | Subtelomeric MLPA                   |
| 03207 | M | 13 | Mild ID, Obesity                                                                                                  |                                     |

---

---

|       |   |    |                                                       |                                                   |
|-------|---|----|-------------------------------------------------------|---------------------------------------------------|
| 03208 | M | 14 | BIF, Microcephaly                                     |                                                   |
| 03210 | M | 10 | Mild ID                                               |                                                   |
| 03247 | F | 20 | Mild MCA/ID, OCD                                      |                                                   |
| 03249 | F | 12 | Moderate ID                                           |                                                   |
| 03250 | F | 21 | Mild MCA/ID, Microcephaly, Short Stature              |                                                   |
| 03252 | M | 8  | Normal Intellectual Functioning                       |                                                   |
| 03256 | M | 11 | BIF, PDD                                              |                                                   |
| 03258 | M | 12 | Mild ID, ADHD                                         |                                                   |
| 03259 | M | 14 | BIF, PDD, EEG Anomalies                               |                                                   |
| 03266 | M | 7  | NOS ID, ASD                                           |                                                   |
| 03268 | M | 8  | Moderate ID, PDD, Rubinstein Taybi phenotype          |                                                   |
| 03269 | M | 17 | Moderate ID                                           |                                                   |
| 03270 | F | 8  | Moderate MCA/ID                                       |                                                   |
| 03271 | M | 22 | Moderate ID, Ataxia                                   | SCA genes. Mitochondrial Genes Mutation Screening |
| 03272 | M | 7  | NOS ID, PDD                                           |                                                   |
| 03275 | M | 8  | Expressive Speech Disorder                            |                                                   |
| 03276 | M | 14 | Mild ID, Microcephaly                                 |                                                   |
| 03279 | M | 21 | Moderate ID, Compulsive Behaviour                     |                                                   |
| 03280 | M | 9  | Gait Disturbance, First Complex Mitochondrial Disease |                                                   |
| 03282 | F | 11 | Severe MCA/ID                                         |                                                   |
| 03284 | M | 14 | Severe ID, ASD                                        |                                                   |
| 03285 | M | 14 | Mild ID                                               |                                                   |
| 03286 | M | 23 | Mild ID                                               |                                                   |
| 03287 | M | 7  | Severe ID, PDD                                        |                                                   |
| 03288 | F | 7  | NOS ID                                                |                                                   |
| 03289 | M | 10 | Mild ID, Chiari 1 Anomaly                             |                                                   |
| 03290 | M | 13 | Learning Disability                                   |                                                   |
| 03291 | F | 62 |                                                       |                                                   |

---

---

|       |   |    |                                                                            |           |
|-------|---|----|----------------------------------------------------------------------------|-----------|
| 03292 | M | 18 | Mild ID                                                                    |           |
| 03293 | F | 13 | Mild MCA/ID                                                                |           |
| 03294 | F | 14 | Mild ID                                                                    |           |
| 03295 | F | 27 | Severe ID, Generalized Epilepsy                                            | PTEN gene |
| 03296 | M | 27 | Moderate ID, Partial Epilepsy                                              |           |
| 03297 | F | 46 | Spastic Paraparesis, Motor Axonal Neuropathy                               |           |
| 03298 | M | 15 | BIF, Epilepsy                                                              |           |
| 03299 | M | 16 | NOS MCA/ID                                                                 |           |
| 03300 | M | 5  | NOS ID, Macrocephaly                                                       |           |
| 03301 | M | 6  | Moderate ID, Myoclonic Epilepsy                                            |           |
| 03302 | M | 14 | Moderate MCA/ID                                                            |           |
| 03303 | M | 11 | BIF                                                                        |           |
| 03305 | M | 8  | BIF                                                                        |           |
| 03306 | F | 3  | Profound ID, Microcephaly, Epilepsy                                        |           |
| 03307 | F | 55 | Ataxia, Tetraparesis, Epilepsy                                             | SCA genes |
| 03308 | M | 19 | Profound MCA/ID, Partial Epilepsy                                          |           |
| 03311 | M | 6  | Severe ID, PDD                                                             |           |
| 03312 | M | 5  | Expressive Speech Disorder, Epilepsy, Macrocephaly, External Hydrocephalus |           |
| 03313 | M | 19 | Severe ID, PDD                                                             |           |
| 03314 | M | 11 | Moderate ID, Epilepsy                                                      |           |
| 03315 | F | 26 | Profound ID, Epilepsy                                                      | MECP2     |
| 03316 | F | 28 | Severe ID, Microcephaly                                                    |           |
| 03317 | F | 51 | SCA                                                                        |           |
| 03319 | M | 14 | Moderate ID, Neurosensory Deafness, Myopathy, COX deficit                  |           |
| 03320 | M | 14 | Mild ID, ADHD, Epilepsy                                                    |           |
| 03321 | M | 28 | Severe ID, PDD, Epilepsy                                                   |           |
| 03322 | M | 16 | BIF                                                                        |           |
| 03323 | F | 9  | Mild ID                                                                    |           |

---

---

|       |   |    |                                                  |
|-------|---|----|--------------------------------------------------|
| 03324 | F | 6  | Mild ID, ADHD                                    |
| 03325 | M | 15 | BIF                                              |
| 03326 | M | 22 | Profound ID                                      |
| 03327 | M | 7  | Moderate MCA/ID                                  |
| 03328 | F | 32 | Mild ID, Anxiety Disorder, Neurosensory Deafness |
| 03329 | M | 17 | Moderate ID                                      |
| 03330 | M | 23 | BIF                                              |
| 03331 | M | 11 | Mild ID, Microcephaly                            |
| 03332 | M | 21 | Severe MCA/ID                                    |
| 03347 | M | 7  | Mild ID, PDD                                     |
| 03348 | F | 8  | BIF                                              |
| 03349 | M | 18 | Moderate ID                                      |
| 03352 | M | 14 | Moderate ID, Craniosynostosis, EEG anomalies     |
| 03353 | M | 17 | Severe ID, Partial Epilepsy                      |
| 03355 | F | 41 | NOS ID, Drug-resistant Partial Epilepsy          |
| 03356 | M | 13 | Moderate ID                                      |
| 03357 | F | 23 | NOS ID, Psychosis                                |
| 03358 | M | 8  | Mild ID, PDD                                     |
| 03359 | M | 18 | Severe MCA/ID                                    |
| 03360 | M | 13 | Bipolar Disorder                                 |
| 03361 | M | 10 | BIF                                              |
| 03362 | F | 14 | Severe ID, ASD, EEG Anomalies                    |
| 03363 | M | 7  | NOS ID, ASD, EEG Anomalies                       |
| 03364 | M | 6  | NOS ID, Partial Epilepsy                         |
| 03365 | M | 3  | Epileptic Encephalopathy                         |
| 03366 | F | 28 | Profound ID, Severe Myoclonic Epilepsy           |
| 03367 | F | 17 | Moderate ID                                      |
| 03368 | M | 10 | Severe ID, VACTERL Association                   |
| 03369 | M | 43 | Severe ID                                        |

---

---

|       |   |    |                                                       |           |
|-------|---|----|-------------------------------------------------------|-----------|
| 03370 | F | 45 | NOS ID, Microcephaly                                  |           |
| 03371 | F | 10 | Moderate ID, Obesity, EEG anomalies                   |           |
| 03372 | M | 19 | Moderate ID                                           |           |
| 03373 | F | 30 | Moderate ID, Psychosis                                |           |
| 03374 | F | 22 | Moderate ID                                           |           |
| 03376 | M | 12 | Mild ID, ADHD                                         |           |
| 03378 | F | 8  | Severe ID, ASD                                        |           |
| 03379 | F | 7  | Moderate ID, PDD                                      |           |
| 03380 | F | 5  | Mild ID                                               |           |
| 03381 | F | 12 | NOS MCA/ID                                            |           |
| 03382 | M | 9  | BIF                                                   |           |
| 03383 | M | 7  | PDD                                                   |           |
| 03384 | M | 11 | BIF                                                   |           |
| 03385 | M | 12 | NOS ID, Early Onset Psychosis                         |           |
| 03386 | M | 6  | NOS ID, PDD                                           |           |
| 03387 | M | 7  | Moderate ID, Epilepsy, Klinefelter syndrome           | Karyotype |
| 03388 | F | 23 | Moderate ID, Schizophrenia                            |           |
| 03389 | M | 27 | Severe ID, Palpebral Myoclonus Syndrome with Absences |           |
| 03391 | F | 23 | Severe ID, Partial Epilepsy, Spastic Tetraparesis     |           |
| 03394 | M | 17 | Moderate ID                                           |           |
| 03396 | F | 19 | Profound ID, PCH 2                                    |           |
| 03397 | F | 16 | Mild ID                                               |           |
| 03398 | M | 28 | Paranoid Schizophrenia                                |           |
| 03399 | F | 25 | Mild ID, Anxiety Disorder                             |           |
| 03400 | M | 12 | Moderate ID, ASD, Obesity                             |           |
| 03401 | F | 16 | Severe MCA/ID, Epilepsy                               |           |
| 03402 | F | 6  | NOS ID, PDD                                           |           |
| 03403 | M | 9  | BIF, Mixed Speech Impairment, EEG Anomalies           |           |
| 03404 | M | 11 | Mild ID, Early Onset Psychosis                        |           |

---

---

|       |   |    |                                               |
|-------|---|----|-----------------------------------------------|
| 03405 | M | 40 | Mild ID, Schizoid Personality Disorder        |
| 03406 | F | 7  | BIF, Expressive Speech Disorder               |
| 03407 | M | 16 | Mild MCA/ID                                   |
| 03411 | M | 8  | Moderate ID, Epilepsy                         |
| 03412 | F | 6  | Speech Delay, EEG Anomalies                   |
| 03413 | M | 10 | NOS MCA/ID, PDD, Generalized Epilepsy         |
| 03414 | M | 6  | NOS ID, ASD, Plagiocephaly                    |
| 03415 | M | 12 | Mild ID, Expressive Speech Disorder, Epilepsy |
| 03419 | M | 13 | Mild ID, ADHD, Epilepsy                       |
| 03422 | F | 14 | BIF, Anxiety Disorder                         |
| 03425 | F | 28 | Severe ID, Obesity                            |
| 03434 | M | 16 | Moderate ID                                   |
| 03435 | F | 5  | NOS ID                                        |
| 03436 | F | 13 | Severe ID, ASD                                |
| 03437 | M | 14 | Moderate MCA/ID                               |
| 03439 | M | 16 | Mild ID, Psychosis                            |
| 03440 | M | 13 | Moderate ID                                   |
| 03441 | M | 6  | NOS ID, PDD                                   |
| 03442 | M | 20 | Moderate ID                                   |
| 03443 | M | 22 | Mild ID, Anxiety Disorder, Epilepsy           |
| 03444 | M | 16 | Moderate ID, ASD, Mood Disorder               |
| 03445 | M | 11 | Mild ID                                       |
| 03447 | F | 10 | Learning Disability, Craniosynostosis         |
| 03448 | F | 23 | Moderate MCA/ID, Obesity                      |
| 03449 | M | 10 | Mild MCA/ID                                   |
| 03466 | M | 6  | Mild MCA/ID                                   |
| 03467 | F | 11 | Mild ID                                       |
| 03468 | M | 16 | Severe ID                                     |
| 03469 | M | 14 | Severe ID                                     |

---

---

|       |   |    |                                                 |           |
|-------|---|----|-------------------------------------------------|-----------|
| 03470 | M | 8  | NOS ID, PDD                                     |           |
| 03471 | F | 14 | BIF, ADHD                                       |           |
| 03472 | F | 11 | BIF                                             |           |
| 03473 | M | 44 | Normal Intellectual Functioning, Infertility    |           |
| 03474 | F | 7  | Severe ID, Microcephaly                         |           |
| 03475 | F | 5  | Severe ID, Generalized Epilepsy                 |           |
| 03476 | M | 8  | NOS ID, ASD, 15q11.2 deletion                   |           |
| 03477 | M | 20 | Mild ID                                         |           |
| 03478 | F | 8  | Severe MCA/ID, Spastic Tetraparesis             |           |
| 0422  | F | 25 | Severe ID, ASD, Epilepsy                        |           |
| 0699  | F | 21 | Severe ID, Epilepsy, 47,XXX                     | Karyotype |
| 0701  | F | 23 | Profound ID, Microcephaly, partial Epilepsy     |           |
| 047   | F | 22 | Moderate ID, Severe Myoclonic Epilepsy          |           |
| 0626  | F | 56 | Mild ID, Coffin-Lowry Syndrome                  |           |
| 0644  | M | 22 | Mild MCA/ID                                     |           |
| 072   | M | 23 | Severe ID, ASD                                  |           |
| 078   | F | 36 | Severe MCA/ID, Ataxia, Cerebellar Hypoplasia    |           |
| 0782  | M | 24 | Profound MCA/ID, Epilepsy                       |           |
| 0837  | M | 20 | Profound ID, Spastic Tetraparesis, Microcephaly |           |
| 1799  | M | 10 | Severe ID, Brachmann De Lange syndrome          |           |
| 2797  | M | 10 | BIF, PDD                                        |           |
| 3213  | M | 10 | Severe ID                                       |           |
| 3042  | M | 7  | PDD                                             |           |
| 3262  | F | 25 | Severe MCA/ID, Alopecia                         |           |
| 2559  | M | 13 | Profound ID, 46, XY, dup (2)(q32@q33            | Karyotype |
| 3236  | F | 10 | Severe ID, PDD, Partial Epilepsy, Macrocephaly  | PTEN gene |

---
