# Supplementary material for: Relative Burden of Large CNVs on a Range of Neurodevelopmental Phenotypes
Source: PubMed Central journal article supplement (PMC3213131; doi:10.1371/journal.pgen.1002334), 2011-11-10
Supplement: pgen.1002334.s014.pdf [file pgen.1002334.s014.pdf]

**Table S7. Clinical features of cases with ID plus MCA**

| <b>Sample ID</b> | <b>Age at diagnosis</b> | <b>Sex</b> | <b>Clinical features</b>                      | <b>Malformations</b>                                                                                                                                                                                                                           | <b>Other testing</b>                                                                    |
|------------------|-------------------------|------------|-----------------------------------------------|------------------------------------------------------------------------------------------------------------------------------------------------------------------------------------------------------------------------------------------------|-----------------------------------------------------------------------------------------|
| GB1              | 2 y                     | F          | Goldenhar-VACTERL spectrum                    | bilateral anotia, bilateral choanal atresia, palatoschisis, multiple VSD, hemivertebrae                                                                                                                                                        | CDH 7 molecular analysis:negative                                                       |
| GB2              | 12 y                    | M          | DD/ MR, Cohen syndrome                        | none                                                                                                                                                                                                                                           |                                                                                         |
| GB3              | 5 y                     | F          | MCA- DD/MR, Odho syndrome                     | NA                                                                                                                                                                                                                                             |                                                                                         |
| GB4              | 2 months                | M          | MCA, Haemifacial microsomia                   | left atresia of external auditive duct, right microtia and low set bud ear, admedial cleft hard and soft palate, malar hypoplasia with left temporal depression, balanic hypospadias, cutaneous syndactyly of 2nd and 3th toes                 | not performed                                                                           |
| GB5              | 6 y                     | M          | MCA, Piebaldism                               | right calcaneovalgus, left talipes varus                                                                                                                                                                                                       |                                                                                         |
| GB6              | 7 y                     | F          | MCA, Rieger syndrome                          | right congenital glaucoma, left microphthalmia and anterior segment dysgenesis, cleft uvula, hypodontia and conical teeth, hyperplasia of frenulum of the tongue                                                                               | not performed<br>proposed PITX2 analysis                                                |
| GB7              | 6 months                | F          | MCA-DD, Rubinstein-Taybi syndrome             | Patent ductus arteriosus, ASD, broad thumbs                                                                                                                                                                                                    | FISH 22q11 : neg<br>EP300 gene: neg<br>CREBB gene : neg                                 |
| GB8              | 17 y                    | F          | MCA, Turner phenotype - XX Ovarian Dysgenesis | spondylosyndesis C2-C3 and C6-C7, sacralization of L5, pectus carinatum,                                                                                                                                                                       | karyotype on fibroblasts and ovaric tissue: 46,XX                                       |
| GB9              | 11 months               | M          | MCA-DD/MR, Microphthalmia plus syndrome       | left microphthalmia, right anophthalmia and orbital hypoplasia, left choanal atresia, right cleft palate, platyspondilia of thoracic vertebral body, right ectopic kidney cryptorchidism, micropenis                                           |                                                                                         |
| GB10             | 7 y                     | M          | MCA-DD/MR, Seckel-like syndrome               | NA                                                                                                                                                                                                                                             |                                                                                         |
| GB11             | 2 y                     | M          | MCA-DD/MR, VACTERL                            | left microphthalmia, right anophthalmia and orbital hypoplasia, left choana atresia, right choana stenosis, right cleft palate, maxillary fission, platyspondilia of thoracic vertebral body, right ectopic kidney, cryptorchidism, micropenis | DEB: negative for FANCONI Syndrome                                                      |
| GB12             | 1 y                     | M          | MCA-DD/MR, Beckwith-Wiedemann syndrome        | NA                                                                                                                                                                                                                                             | VLCFA dosage:negative; FISH 22 and 10:negative;<br>methylation analysis 11p15: negative |
| GB13             | 6 y                     | M          | MCA-DD/MR, Coffin-Siris syndrome              | hypoplastic distal phalanges                                                                                                                                                                                                                   | 17p microdeletion: negative                                                             |

|      |            |   |                                                                       |                                                                                                                                                                    |                                                                                                                                                                        |
|------|------------|---|-----------------------------------------------------------------------|--------------------------------------------------------------------------------------------------------------------------------------------------------------------|------------------------------------------------------------------------------------------------------------------------------------------------------------------------|
| GB14 | 2 y        | M | MCA-DD/MR, COFS syndrome                                              | bilateral congenital cataract, VSD, bilateral pyelectasia                                                                                                          | Analyses of DNA repair on fibroblast: NEG;<br>metabolic analysis: negative not performed                                                                               |
| GB15 | 2 y        | F | MCA-DD/MR, Goldenhar spectrum                                         | left anotia, cheilognathopalatoschisis, hypoplastic tongue, VSD                                                                                                    |                                                                                                                                                                        |
| GB16 | 8 y        | F | MCA-DD/MR, Hemifacial macrosomia                                      | left external auditory duct atresia, left poliotia, external right ear malformation, right epibulbar dermoid cyst, ASD and VSD, transposition of the great vessels | FISH 22q11.2 negative                                                                                                                                                  |
| GB17 | 5 y        | F | MCA-DD/MR, Hypomelanosis of Ito                                       | camptodactyly of 5th finger                                                                                                                                        |                                                                                                                                                                        |
| GB18 | 4 months   | F | MCA-DD/MR, Mowat-Wilson syndrome                                      | Hirschprung disease, Patent ductus arteriosus                                                                                                                      | FISH 22q11.2 negative                                                                                                                                                  |
| GB19 | 15 y       | M | MCA-DD/MR, Myhre syndrome                                             | agenesia of 5 teeth, conic teeth, cleft palate, bilateral cryptorchidism, agenesia of deferent, brachydactylia                                                     |                                                                                                                                                                        |
| GB20 | 4 months   | M | MCA, Blepharophymosis-epicanthus inversus                             | none                                                                                                                                                               |                                                                                                                                                                        |
| GB21 | 14 months  | M | MCA-DD/MR, Overgrowth syndrome, Cranio-fronto-nasal syndrome spectrum | diastasis recti abdominis, cryptorchidism, hypospadias                                                                                                             | NSD, FGFR2, FGFR3, TWIST, EPHRIN B, EFNB analysis: negative; del5q35.3: negative,                                                                                      |
| GB22 | 3 days old | F | MCA, Seckel like phenotype                                            | cleft palate, arthrogyrosis                                                                                                                                        |                                                                                                                                                                        |
| GB23 | 4 y        | F | MCA-DD/MR, Sotos like phenotype                                       | blue scleras                                                                                                                                                       | FRAXA: negative; FISH 5q35.3: negative; NSD1 analysis: negative; molecular analysis for Prader-Willi syndrome, Steinert syndrome: negative. Muscular biopsy: negative. |
| GB24 | 11 y       | M | MCA-DD/MR, Joubert syndrome suspicion                                 | NA                                                                                                                                                                 |                                                                                                                                                                        |
| GB25 | 6 months   | F | MCA-DD/MR, Aicardi syndrome                                           | pseudocoloboma iris                                                                                                                                                |                                                                                                                                                                        |
| GB26 | 5 y        | M | MCA-DD/MR, Pallister-Killian Syndrome suspicion                       | VSD                                                                                                                                                                |                                                                                                                                                                        |
| GB27 | 1 month    | F | MCA-DD/MR, WAGR/Beckwith-Wiedemann syndrome                           | congenital cataract, left megaureter, right pyelectasia                                                                                                            | metabolic analysis: negative; 11p15 methylation pattern negative                                                                                                       |
| GB28 | 7 months   | M | BECKWITH                                                              | lower limb's dysmetria,                                                                                                                                            | 11p15 methylation pattern negative                                                                                                                                     |

|      |          |   |                                              |                                                                                                                                                                                              |                                                                                                                             |
|------|----------|---|----------------------------------------------|----------------------------------------------------------------------------------------------------------------------------------------------------------------------------------------------|-----------------------------------------------------------------------------------------------------------------------------|
|      |          |   | WIEDEMANN SYNDROME                           | umbelical hernia,auricular pits                                                                                                                                                              |                                                                                                                             |
| GB29 | 1 month  | M | Susp Menkes,susp Cutis Laxa syndrome         | none                                                                                                                                                                                         | connexina 26 neg, MENKES negative, cystic fibrosis negative<br>NIPLB 1 analysis: in progress                                |
| GB30 | 8 y      | F | DD/MR, Cornelia de Lange spectrum            | NA                                                                                                                                                                                           |                                                                                                                             |
| GB31 | 17 y     | F | DD/MR, Beckwith Wiedemann                    | asymmetric lower extremities, mandibulofacial dysostosis                                                                                                                                     | 11p15 methylation pattern negative                                                                                          |
| GB32 | 8 y      | F | DD/MR,Dubowitz Syndrome                      | NA                                                                                                                                                                                           |                                                                                                                             |
| GB33 | 3 months | M | MCA, Lung hypoplasia syndrome                | dextrocardia, ASD, right lung hypoplasia                                                                                                                                                     | not performed                                                                                                               |
| GB34 | 2 days   | M | SPECIFIC SYNDROMIC PHENOTYPE MCA             | cleft palate, left upper extremity hemimelia, left hand agenesis, T3 butterfly vertebra, 5th rib arch anomaly, right kidney hypoplasia and ectopia, left kidney malrotation imperforate anus | not performed                                                                                                               |
|      |          |   | VACTERL association                          |                                                                                                                                                                                              |                                                                                                                             |
| GB35 | 11 y     | F | OTHER, CNS abnormalities                     | none                                                                                                                                                                                         | metabolic analysis:negative                                                                                                 |
| GB36 | 11 y     | F | OTHER, familial CHD                          | bilateral cleft palate, aortic subvalvular stenosis                                                                                                                                          |                                                                                                                             |
| GB37 | 3 y      | M | OTHER, familial CHD                          | patent ductus arteriosus,bilateral crytorchidism                                                                                                                                             | not performed                                                                                                               |
| GB38 | 6 months | M | Syndromic CHD                                | tetralogy of Fallot, pulmonary valve agenesis, posteriorly placed anomalous vein, short humerus                                                                                              |                                                                                                                             |
| GB39 | 4 y      | F | CHD                                          | myocardiopathy and Wolff-Parkinson-White syndrome                                                                                                                                            |                                                                                                                             |
| GB40 | 6 y      | F | Facial chromosomal phenotype                 | NA                                                                                                                                                                                           |                                                                                                                             |
| GB41 | 4 months | M | Isolated hemihypertrophy                     | NA                                                                                                                                                                                           | normal metilation pattern of KvDMR1 and H19 (BWS negative)<br>analysis of gene laminin: normal;<br>serphin gene not deleted |
| GB42 | 10 y     | F | MCA DD/MR, Mulvihill-Smith Syndrome          | ASD                                                                                                                                                                                          |                                                                                                                             |
| GB43 | 11 y     | F | MCA- DD/MR, microcephaly-lymphedema syndrome | S1 schysis                                                                                                                                                                                   | FISH 22q11 and FISH10p:negative                                                                                             |
| GB44 | 1 month  | M | MCA-DD, COFS spectrum                        | II-III toes syndactyly                                                                                                                                                                       | metabolic analysis:negative                                                                                                 |

|      |          |   |                                           |                                                                                    |                                                                  |
|------|----------|---|-------------------------------------------|------------------------------------------------------------------------------------|------------------------------------------------------------------|
| GB45 | 1 day    | M | DD/MR, De Lange spectrum                  | unilaterla preaxial polydactyly                                                    |                                                                  |
| GB46 | 11 y     | M | DD/MR, CHARGE syndrome                    | choanal stenosis,short neck, crenate breastbone,pyelic ectasia                     |                                                                  |
| GB47 | 2 y      | F | DD/MR, DiGeorge syndrome-like phenotype   | truncus                                                                            | FISH22q11:negative deletion 22q11 on amniocytes(microsatellites) |
| GB48 | 2 months | M | DD/MR, 8 Trisomy mosaic                   | patent ductus arteriosus,mild septal hypertrophy, hypospadias,                     | Karyotype on 50 metaphases:47,XY,+8 (84%)/46,XY                  |
| GB49 | 18 y     | M | MCA-DD/MR, Beals Syndrome                 | cataract, camptodactyly, severe scoliosis, joint contractures, left cryptorchidism |                                                                  |
| GB50 | 8 y      | F | MCA-DD, Beckwith-Wiedemann-like phenotype | NA                                                                                 |                                                                  |
| GB51 | 5 months | F | Developmental delay                       | low set ears, hypertelorism, long philtrum                                         |                                                                  |
| GB52 | 9 months | M | Beckwith-Wiedemann                        | NA                                                                                 | metabolic analysis:negative; 11p15 methylation pattern negative  |
| GB53 | NA.      | M | Noonan-like phenotype                     | multiple VSD, cryptorchidism, short stature                                        | PTPN11 and SOS1 neg                                              |
| GB54 | NA.      | F | Noonan-like phenotype                     | pulmonic valve stenosis                                                            | PTPN11 negative                                                  |
| GB55 | NA.      | M | Noonan-like phenotype                     | severe hypertrophic cardiomyopathy                                                 | PTPN11 negative                                                  |
| GB56 | NA.      | F | Noonan-like phenotype                     | pulmonic valve stenosis mitral insufficiency                                       | PTPN11 negative SOS1 negative                                    |
| GB57 | NA.      | M | Noonan-like phenotype                     | NA                                                                                 | PTPN11 negative                                                  |
| GB58 | NA.      | M | Noonan-like phenotype                     | VSD, cryptorchidism,                                                               | PTPN11 negative SOS1 negative                                    |
| GB59 | NA.      | M | Noonan-like phenotype                     | arrhythmia cryptorchidism                                                          | PTPN11 negative SOS1 positive                                    |
| GB60 | NA.      | M | Noonan-like phenotype                     | pulmonic valve stenosis, cryptorchidism                                            | PTPN11 negative                                                  |
| GB61 | NA.      | M | Noonan-like phenotype                     | pulmonic valve stenosis                                                            | PTPN11 negative                                                  |
| GB62 | NA.      | M | Noonan-like phenotype                     | tetralogy of Fallot, cryptorchidism                                                | PTPN11 negative                                                  |
| GB63 | NA.      | F | Noonan-like phenotype                     | pulmonic valve                                                                     | PTPN11                                                           |

|      |         |   |                                          |                                                                                                                                    |                                   |
|------|---------|---|------------------------------------------|------------------------------------------------------------------------------------------------------------------------------------|-----------------------------------|
|      |         |   |                                          | stenosis                                                                                                                           | negative                          |
| GB64 | NA.     | M | Noonan-like phenotype                    | hypertrophic cardiomyopathy                                                                                                        | PTPN11<br>negative                |
| GB65 | NA.     | F | Noonan-like phenotype                    | pulmonic valve stenosis                                                                                                            | PTPN11<br>negative                |
| GB66 | NA.     | M | Noonan-like phenotype                    | double outlet right ventricle                                                                                                      | PTPN11<br>negative                |
| GB67 | 5 days  | M | MCA/VATER<br>association                 | right coloboma of the retina, right posterior polar cataract,<br>right microphthalmia, D-T butterfly vertebrae, XII rib agenesis   |                                   |
| GB68 | 9 y     | M | MCA-DD/MR, Cornelia<br>de Lange syndrome | atrial sept defect (ostium primum and ostium secundum), mitralic<br>valve incompetence,<br>cryptorchidism, clinodactyly 5th finger | NIPLB 1 analysis: negative        |
| GB71 | 17 y    | F | MCA-DD/MR.<br>9 Trisomy                  | congenital dislocation of the hip                                                                                                  |                                   |
| GB72 | 1 month | F | MCA, Mowat-Wilson                        | Hirschprung's disease                                                                                                              |                                   |
| GB73 | 1 month | F | MCA-DD/MR, Mowat-<br>Wilson              | Hirschprung's disease                                                                                                              | RET: negative<br>ZFHX1B: negative |
| GB88 | NA.     | M | MCA, 1 Trisomy                           | polycystic kidney, duodenum<br>stenosis, bowel malrotation, pancreas malformation, staphyloschisis                                 |                                   |
| GB92 | NA.     | M | Williams syndrome                        | anomalous pulmonary venous<br>return, long SQT interval (pacemaker), pulmonary regurgitation                                       | Del7q21.23                        |
