# Supplementary material for: Relative Burden of Large CNVs on a Range of Neurodevelopmental Phenotypes
Source: PubMed Central journal article supplement (PMC3213131; doi:10.1371/journal.pgen.1002334), 2011-11-10
Supplement: pgen.1002334.s015.pdf [file pgen.1002334.s015.pdf]

**Table S8A. Comparison of rare CNV rates in the cohorts studied**

| Cohort1       | Cohort2      | No. of rare CNV cases (cohort1) | No. of rare CNV cases (cohort2) | Significance (p-value) | Odds ratio |
|---------------|--------------|---------------------------------|---------------------------------|------------------------|------------|
| IDMCACombined | Dyslexia     | 69                              | 6                               | 3.55E-12               | 10.016404  |
| IDMCACombined | Autism       | 69                              | 35                              | 0.018974303            | 1.6110072  |
| Autism        | Dyslexia     | 35                              | 6                               | 2.41E-06               | 6.1095819  |
| ID            | MCA          | 60                              | 9                               | 0.225328002            | 1.4306148  |
| AutismMR      | AutismNoMR   | 11                              | 25                              | 0.476515456            | 1.0922966  |
| Dyslexia      | NIMH control | 6                               | 6                               | 0.578710884            | 0.9494     |
| ID            | NIMH control | 60                              | 6                               | 1.09E-11               | 10.0671    |
| Autism        | NIMH control | 35                              | 6                               | 5.06702E-06            | 5.814      |
| IDMCACombined | NIMH control | 69                              | 6                               | 1.43E-11               | 9.5304     |

**Table S8B. Rare CNVs in dyslexia, autism, and ID**

| Cohort   | Total | Cases      | CNVs       | Two hits | RefSeq genes | median size | Hotspot CNVs | non-hotspot CNVs | genomic disorder |
|----------|-------|------------|------------|----------|--------------|-------------|--------------|------------------|------------------|
| Dyslexia | 322   | 6 (1.9%)   | 6 (2%)     | 0 (0%)   | 10           | 302 kb      | 3 (50%)      | 3                | 0                |
| Autism   | 336   | 35 (10.4%) | 36 (10.7%) | 1 (2.8%) | 680          | 662 kb      | 21 (58%)     | 15               | 8                |
| ID       | 358   | 60 (16.8%) | 64 (17.9%) | 4 (6.6%) | 1537         | 849 kb      | 20 (31%)     | 44               | 15               |
| ID/MCA   | 73    | 9 (12.3%)  | 13 (17.8%) | 4 (44%)  | 678          | 1.86 Mb     | 5 (60%)      | 8                | 5                |

**Table S8C. Inheritance of rare CNVs in the disease cohorts**

|          | Total tested | <i>de novo</i> | Paternal | Maternal | Total inherited | Both | Complex* |
|----------|--------------|----------------|----------|----------|-----------------|------|----------|
| Dyslexia | 8            | 0              | 5        | 3        | 8 (100%)        |      |          |
| Autism   | 35           | 14 (40%)       | 9        | 11       | 21 (60%)        | 1    |          |
| ID       | 47           | 30 (63.8%)     | 5        | 9        | 14 (29.8%)      |      | 3        |

\*Complex inheritance includes balanced translocations.

**Table S8D. Individuals with two rare copy number variants**

| Cohort | Sample | Chrom | Start | Size | Chr. Band | CNV | inheritance |
|--------|--------|-------|-------|------|-----------|-----|-------------|
|--------|--------|-------|-------|------|-----------|-----|-------------|

|                |      |       |             |            |                   |             |                                                    |
|----------------|------|-------|-------------|------------|-------------------|-------------|----------------------------------------------------|
| ID             | 699  | chr4  | 152,300,259 | 423,718    | 4q31.3            | deletion    | de novo                                            |
|                |      | chrY  | 3,072,083   | 3,082,442  | Yp11.2            | duplication | de novo                                            |
| ID             | 2522 | chr15 | 80,767,738  | 19,379,303 | 15q25             | duplication | paternal or de novo                                |
|                |      | chr2  | 188,179,827 | 673,252    | 2q32.1            | duplication | paternal or de novo                                |
| ID             | 2597 | chr11 | 121,813,520 | 12,633,728 | 11q24.1-q25       | deletion    | de novo                                            |
|                |      | chrX  | 65,611,216  | 322,784    | Xq12              | deletion    | maternal                                           |
| ID             | 3448 | chr3  | 50,846,910  | 7,577,247  | 3p21.31p14.3      | duplication | de novo                                            |
|                |      | chr5  | 156,526,018 | 7,607,806  | 5q33.3q34         | duplication | de novo                                            |
| ID with MCA    | GB58 | chr3  | 197,391,142 | 2,039,784  | 3q29              | duplication | de novo                                            |
|                |      | chr17 | 3,707       | 1,856,379  | 17p13.3           | deletion    | de novo                                            |
| ID with MCA    | GB6  | chr4  | 110,560,125 | 3,335,124  | 4q25              | deletion    | de novo                                            |
|                |      | chr16 | 15,170,619  | 3,491,890  | 16p13.11          | duplication | paternal                                           |
| ID with MCA    | GB71 | chr9  | 201336      | 16,470,976 | partial trisomy 9 | duplication | 46,XX rcp (8;10)(q2.2;q21.2) + t (9;12)(p2.2;p1.3) |
|                |      | chr13 | 83,679,489  | 705,821    | 13q31.1 dup       | duplication | maternal                                           |
| ID with MCA    | GB88 | chr5  | 90,252      | 1,540,511  | 5p15.33           | deletion    | 46,XX,t(1;5)(q23;p15) balanced (maternal)          |
|                |      | chr1  | 174,979,260 | 63,278,601 | 1q24qter          | duplication | 46,XX,t(1;5)(q23;p15) balanced (maternal)          |
| Autism with ID | Si84 | chr16 | 29,546,342  | 583,059    | 16p11.2           | deletion    | de novo                                            |
|                |      | chr22 | 21,298,606  | 2,064,156  | 22q11.22          | duplication | maternal                                           |

Shaded rows depict two hits due to a derivative chromosome representing a single unbalanced translocation event
