# Supplementary material for: Relative Burden of Large CNVs on a Range of Neurodevelopmental Phenotypes
Source: PubMed Central journal article supplement (PMC3213131; doi:10.1371/journal.pgen.1002334), 2011-11-10
Supplement: pgen.1002334.s016.pdf [file pgen.1002334.s016.pdf]

**Table S9. Genomic disorders identified in 1,227 cases with dyslexia, autism, ID, and ID/MCA.**

| Chr   | Start     | End       | Size     | Chr. Band     | CNV         | Sample | Cohort   | Type   | Inheritance      | Control CNVs | Gene count |
|-------|-----------|-----------|----------|---------------|-------------|--------|----------|--------|------------------|--------------|------------|
| chr1  | 743498    | 5334310   | 4590812  | 1p36          | deletion    | 3332   | ID       | non-HS | de novo          | 0            | 91         |
| chr1  | 245415305 | 247043877 | 1628572  | 1q44          | deletion    | Si138  | Autism   | non-HS | maternal         | 0            | 48         |
| chr15 | 18045749  | 30589746  | 12543997 | 15q11.2q13.3  | duplication | 3213   | ID       | HS     | de novo          | 0            | 142        |
| chr15 | 26994610  | 30522495  | 3527885  | 15q13.1q13.3  | deletion    | 1879   | ID       | HS     | de novo          | 0            | 17         |
| chr16 | 14936606  | 16426815  | 1490209  | 16p13.12      | deletion    | 3401   | ID       | HS     | maternal         | 2            | 15         |
| chr16 | 15170619  | 18662509  | 3491890  | 16p13.11      | duplication | GB6    | ID/MCA   | HS     | paternal         | 2            | 14         |
| chr16 | 15367033  | 18321829  | 2954796  | 16p11.31p12.3 | deletion    | 3376   | ID       | HS     | maternal         | 0            | 12         |
| chr16 | 15386338  | 16177142  | 790804   | 16p13.12      | duplication | 2449   | ID       | HS     | maternal         | 10           | 9          |
| chr16 | 28730254  | 28949347  | 219093   | 16p11.2       | deletion    | 3360   | ID       | HS     | NA               | 1            | 9          |
| chr16 | 29554938  | 30104150  | 549212   | 16p11.2       | deletion    | 2257   | ID       | HS     | NA               | 3            | 27         |
| chr16 | 29655898  | 29979351  | 323453   | 16p11.2       | deletion    | 3042   | ID       | HS     | NA               | 3            | 18         |
| chr17 | 3707      | 1860086   | 1856379  | 17p13.3       | deletion    | GB58   | ID/MCA   | non-HS | de novo          | 0            | 31         |
| chr17 | 13958086  | 15457720  | 1499634  | 17p12         | duplication | Si102  | Autism   | HS     | de novo          | 2            | 9          |
| chr17 | 31880822  | 33305362  | 1424540  | 17q12         | deletion    | 3299   | ID       | HS     | de novo          | 2            | 18         |
| chr17 | 41063431  | 41533855  | 470424   | 17q21.31      | deletion    | GB61   | ID/MCA   | HS     | de novo          | 0            | 9          |
| chr22 | 46841144  | 49542685  | 2701541  | 22q13.22      | deletion    | 3282   | ID       | non-HS | Paternal/de novo | 0            | 41         |
| chr3  | 197188186 | 198861094 | 1672908  | 3q29          | deletion    | 3249   | ID       | HS     | de novo          | 0            | 24         |
| chr3  | 197391142 | 199430926 | 2039784  | 3q29          | duplication | GB58   | ID/MCA   | HS     | de novo          | 0            | 33         |
| chr5  | 175479594 | 177400099 | 1920505  | 5q35          | deletion    | 3359   | ID       | HS     | de novo          | 0            | 41         |
| chr6  | 100383567 | 103310184 | 2926617  | 6q16.3        | deletion    | 1755   | ID       | non-HS | de novo          | 0            | 4          |
| chr7  | 72300576  | 73798218  | 1497642  | 7q11.23       | deletion    | GB92   | ID/MCA   | HS     | de novo          | 0            | 28         |
| chr8  | 8085497   | 11899019  | 3813522  | 8p23.1        | deletion    | 2473   | ID       | HS     | NA               | 0            | 32         |
| chr15 | 18193472  | 26871283  | 8677811  | 15q11.2q13.1  | duplication | Si41   | Autism   | HS     | de novo          | 0            | 125        |
| chr16 | 29546342  | 30129401  | 583059   | 16p11.2       | deletion    | Si175  | Autism   | HS     | de novo          | 3            | 36         |
| chr16 | 29546342  | 30129401  | 583059   | 16p11.2       | deletion    | Si245  | Autism   | HS     | de novo          | 3            | 36         |
| chr16 | 29546342  | 30129401  | 583059   | 16p11.2       | deletion    | Si84   | Autism   | HS     | de novo          | 3            | 36         |
| chr22 | 17266528  | 19800553  | 2534025  | 22q11.21      | deletion    | Si123  | Autism   | HS     | de novo          | 0            | 59         |
| chr22 | 21298606  | 23362762  | 2064156  | 22q11.22      | duplication | Si84   | Autism   | HS     | maternal         | 3            | 41         |
| chr15 | 20301665  | 20602651  | 300986   | 15q11.2       | deletion    | 937    | Dyslexia | HS     | paternal         | 25           | 7          |
