# Supplementary material for: Relative Burden of Large CNVs on a Range of Neurodevelopmental Phenotypes
Source: PubMed Central journal article supplement (PMC3213131; doi:10.1371/journal.pgen.1002334), 2011-11-10
Supplement: pgen.1002334.s017.pdf [file pgen.1002334.s017.pdf]

**Table S10. Clinical features of an individual with 6q16 deletion.**

| Clinical features                        | Previous studies* | This study                                                                            |
|------------------------------------------|-------------------|---------------------------------------------------------------------------------------|
| Age of the patient                       | NA                | 10 year old male                                                                      |
| Inheritance                              | NA                | de novo                                                                               |
| Developmental delay                      | 10/10             | mild mental retardation                                                               |
| Language delay                           | 6/10              | No                                                                                    |
| Hyperphagia                              | 5/10              | No                                                                                    |
| Hypotonia                                | 8/10              | No                                                                                    |
| Obesity                                  | 7/10              | No                                                                                    |
| Tapered fingers                          | 2/10              | No                                                                                    |
| Clinodactyly                             | 2/10              | No                                                                                    |
| Short stature                            | 2/10              | No                                                                                    |
| Vision anomalies                         | 7/10              | Hypermetropic astigmatism                                                             |
| Behavioral problems<br>(autism features) | 6/10              | No                                                                                    |
| Cardiac features                         | 2/10              | No                                                                                    |
| Brain anomalies                          | 5/10              | No                                                                                    |
| EEG anomalies                            | 4/10              | No                                                                                    |
| Rounded face/full cheeks                 | 4/10              | asymmetric facies                                                                     |
| Skull anomalies                          | 7/10              | craniosynostosis (plagiocephaly Left posterior and<br>Right anterior)                 |
| Microcephaly                             | 1/10              | No                                                                                    |
| Eye anomalies                            | 5/10              | No                                                                                    |
| Low-set ears                             | 4/10              | No                                                                                    |
| malformed ears                           | 9/10              | Asymmetry                                                                             |
| Nose                                     | 9/10              | No                                                                                    |
| Philtrum                                 | 3/10              | smooth philtrum                                                                       |
| Microretrognathia                        | 7/10              | No                                                                                    |
| Mouth/malpositioned teeth                | 2/10              | narrow mouth                                                                          |
| High arched palate                       | 2/10              | No                                                                                    |
| Skeletal features                        | NA                | joint laxity, pes planus, partial 2nd-3rd toe cutaneous<br>syndactyly                 |
| Perinatal history                        |                   | Fracture on the right clavicle during eutocic delivery<br>after 38 weeks of pregnancy |
| Birth weight                             | NA                | 3,150 grams                                                                           |
| Birth length                             | NA                | NA                                                                                    |
| Head circumference<br>(OFC)              | NA                | 34 cm                                                                                 |
| Maternal age                             | NA                | NA                                                                                    |
| Paternal age                             | NA                | NA                                                                                    |

\*Previous study includes Bonaglia et al., 2008<sup>2</sup>; Klein et al., 2007<sup>3</sup>; Le Caignec et al., 2005<sup>4</sup>; and Verela et al., 2006<sup>5</sup>.
